# Supplementary material for: A facile strategy applied to simultaneous qualitative-detection on multiple components of mixture samples: a joint study of infrared spectroscopy and multi-label algorithms on PBX explosives
Source: Royal Society of Chemistry journal article supplement (doi:10.1039/c5ra20685e), 2016-01-01
Supplement: c5ra20685e1.xlsx [file c5ra20685e1.xlsx]

## Sheet: Sheet1
train dataset
HMX	RDX	TATB	TNT	spectrum
1	-1	-1	-1	0.135	0.109	0.0909	0.0905	0.11	0.199	0.316	0.365	0.397	0.405	0.391	0.356	0.301	0.245	0.238	0.295	0.386	0.488	0.579	0.631	0.648	0.629	0.573	0.486	0.373	0.249	0.13	0.0496	0.0322	0.0435	0.0493	0.0481	0.0455	0.0418	0.0371	0.0322	0.0273	0.0227	0.0184	0.0146	0.0113	0.00902	0.00741	0.00617	0.00524	0.00524
1	-1	-1	-1	0.126	0.115	0.0968	0.0985	0.123	0.188	0.27	0.308	0.33	0.338	0.321	0.287	0.241	0.197	0.202	0.268	0.358	0.45	0.534	0.589	0.607	0.59	0.54	0.457	0.348	0.229	0.115	0.0369	0.0189	0.0282	0.0339	0.0349	0.0337	0.0305	0.0268	0.0236	0.0199	0.016	0.0128	0.0101	0.00794	0.0066	0.0055	0.0044	0.00371	0.0034
1	-1	-1	-1	0.0807	0.075	0.0714	0.0703	0.0919	0.145	0.214	0.249	0.271	0.279	0.27	0.246	0.208	0.177	0.19	0.251	0.331	0.415	0.483	0.525	0.54	0.524	0.477	0.403	0.307	0.201	0.102	0.0371	0.0234	0.034	0.0383	0.0367	0.0346	0.0318	0.0279	0.0239	0.0202	0.0171	0.0139	0.0107	0.00814	0.00656	0.0055	0.005	0.00478	0.0047
1	1	-1	-1	0.0917	0.0826	0.0935	0.133	0.168	0.201	0.23	0.228	0.224	0.205	0.176	0.145	0.114	0.0897	0.0799	0.0851	0.1	0.122	0.151	0.175	0.189	0.198	0.2	0.195	0.184	0.174	0.17	0.175	0.187	0.202	0.217	0.228	0.232	0.23	0.221	0.208	0.191	0.173	0.157	0.148	0.144	0.145	0.15	0.158	0.165	0.168
1	1	-1	-1	0.105	0.126	0.146	0.162	0.202	0.233	0.243	0.233	0.222	0.203	0.176	0.144	0.112	0.0877	0.0787	0.0878	0.108	0.13	0.152	0.169	0.182	0.191	0.196	0.193	0.187	0.182	0.181	0.187	0.202	0.221	0.236	0.243	0.244	0.24	0.23	0.218	0.201	0.182	0.167	0.158	0.154	0.156	0.16	0.164	0.167	0.169
1	1	-1	-1	0.106	0.0909	0.107	0.13	0.16	0.181	0.196	0.19	0.186	0.17	0.147	0.126	0.101	0.0798	0.0759	0.0829	0.0978	0.118	0.139	0.156	0.167	0.175	0.181	0.18	0.174	0.169	0.167	0.173	0.186	0.201	0.213	0.218	0.217	0.211	0.2	0.187	0.174	0.158	0.146	0.141	0.14	0.142	0.147	0.152	0.156	0.157
1	1	-1	-1	0.108	0.091	0.0883	0.124	0.169	0.205	0.247	0.265	0.276	0.271	0.251	0.221	0.189	0.169	0.171	0.194	0.23	0.27	0.308	0.337	0.351	0.351	0.335	0.305	0.265	0.221	0.186	0.169	0.173	0.189	0.202	0.207	0.208	0.205	0.197	0.187	0.176	0.165	0.155	0.148	0.145	0.147	0.153	0.159	0.162	0.163
1	1	-1	-1	0.0488	0.0683	0.096	0.11	0.135	0.172	0.214	0.221	0.222	0.211	0.19	0.164	0.132	0.106	0.0987	0.112	0.14	0.178	0.216	0.242	0.257	0.26	0.251	0.23	0.201	0.169	0.142	0.128	0.127	0.136	0.144	0.148	0.149	0.146	0.14	0.131	0.121	0.112	0.102	0.0958	0.0925	0.092	0.0937	0.0962	0.0979	0.0978
1	1	-1	-1	0.0466	0.0752	0.104	0.124	0.138	0.173	0.224	0.235	0.237	0.229	0.21	0.185	0.154	0.122	0.105	0.115	0.143	0.181	0.219	0.243	0.257	0.261	0.252	0.231	0.202	0.169	0.14	0.127	0.133	0.152	0.168	0.174	0.175	0.171	0.164	0.154	0.14	0.126	0.113	0.104	0.101	0.104	0.108	0.112	0.115	0.116
1	1	-1	-1	0.103	0.0685	0.0517	0.0962	0.16	0.21	0.267	0.285	0.296	0.288	0.262	0.225	0.182	0.15	0.144	0.164	0.199	0.242	0.288	0.319	0.332	0.328	0.308	0.277	0.237	0.191	0.149	0.126	0.127	0.139	0.15	0.154	0.153	0.149	0.141	0.132	0.122	0.112	0.103	0.097	0.0944	0.0952	0.097	0.0985	0.0985	0.0976
1	1	-1	-1	0.0654	0.0965	0.113	0.134	0.162	0.201	0.232	0.247	0.249	0.243	0.223	0.194	0.16	0.135	0.13	0.145	0.176	0.212	0.242	0.267	0.283	0.283	0.267	0.238	0.203	0.167	0.136	0.12	0.121	0.131	0.139	0.142	0.141	0.138	0.131	0.122	0.111	0.101	0.0938	0.09	0.0874	0.0865	0.0866	0.0874	0.0878	0.0872
1	1	-1	-1	0.0891	0.103	0.111	0.12	0.127	0.161	0.216	0.231	0.233	0.228	0.211	0.187	0.155	0.122	0.106	0.114	0.139	0.183	0.225	0.251	0.266	0.266	0.253	0.231	0.2	0.167	0.136	0.118	0.119	0.128	0.136	0.139	0.138	0.133	0.125	0.115	0.103	0.0928	0.0848	0.0817	0.0805	0.0795	0.08	0.0814	0.0816	0.0806
1	1	-1	-1	0.114	0.149	0.169	0.187	0.208	0.264	0.313	0.331	0.335	0.327	0.304	0.266	0.222	0.185	0.177	0.218	0.281	0.343	0.399	0.441	0.459	0.454	0.426	0.376	0.308	0.232	0.161	0.117	0.108	0.12	0.129	0.13	0.129	0.124	0.115	0.106	0.0972	0.0877	0.0786	0.0713	0.0674	0.0675	0.0694	0.0723	0.0748	0.0762
1	1	-1	-1	0.0948	0.0866	0.0923	0.108	0.149	0.207	0.259	0.282	0.296	0.292	0.275	0.247	0.209	0.176	0.174	0.21	0.266	0.324	0.376	0.412	0.43	0.425	0.396	0.348	0.288	0.22	0.157	0.115	0.105	0.114	0.122	0.126	0.125	0.121	0.116	0.107	0.096	0.0866	0.0794	0.0735	0.07	0.0691	0.0694	0.0701	0.0704	0.0703
1	1	-1	-1	0.14	0.107	0.094	0.126	0.16	0.213	0.284	0.314	0.332	0.327	0.305	0.27	0.225	0.189	0.184	0.217	0.271	0.331	0.391	0.43	0.446	0.44	0.41	0.36	0.294	0.221	0.151	0.111	0.106	0.119	0.129	0.132	0.13	0.125	0.117	0.109	0.0996	0.0906	0.0819	0.0751	0.0711	0.0708	0.0723	0.0745	0.0762	0.0772
1	1	-1	-1	0.0782	0.0959	0.109	0.145	0.178	0.235	0.291	0.322	0.336	0.333	0.313	0.28	0.239	0.21	0.212	0.256	0.326	0.4	0.458	0.501	0.518	0.508	0.468	0.403	0.321	0.232	0.148	0.096	0.0822	0.0929	0.103	0.104	0.102	0.098	0.0919	0.0836	0.0749	0.0663	0.059	0.0539	0.0512	0.0495	0.0497	0.0508	0.0508	0.0503
1	1	-1	-1	0.116	0.134	0.144	0.151	0.182	0.27	0.346	0.373	0.384	0.379	0.358	0.317	0.259	0.207	0.202	0.255	0.337	0.422	0.496	0.547	0.568	0.555	0.513	0.448	0.361	0.263	0.171	0.116	0.111	0.127	0.137	0.141	0.14	0.135	0.126	0.114	0.1	0.0872	0.0758	0.0688	0.0652	0.065	0.0662	0.0682	0.0695	0.0699
1	1	-1	-1	0.0618	0.0809	0.096	0.11	0.145	0.192	0.265	0.295	0.31	0.308	0.292	0.262	0.217	0.177	0.177	0.22	0.282	0.35	0.419	0.463	0.481	0.472	0.438	0.381	0.306	0.223	0.142	0.09	0.0832	0.0954	0.104	0.107	0.106	0.103	0.0976	0.0903	0.0824	0.0747	0.0675	0.0621	0.0587	0.0575	0.0576	0.0581	0.0582	0.0579
1	1	1	-1	0.217935	0.171778	0.146938	0.181628	0.210356	0.227871	0.267047	0.273339	0.275739	0.262611	0.237793	0.207141	0.175952	0.151292	0.139289	0.141191	0.155255	0.186989	0.232092	0.290261	0.359334	0.423695	0.473231	0.501987	0.508719	0.498037	0.474002	0.445193	0.412786	0.375615	0.332343	0.286966	0.250246	0.233249	0.222336	0.208226	0.190361	0.170969	0.154859	0.145069	0.140987	0.141821	0.144754	0.148988	0.151833	0.151739
1	1	1	-1	0.0860287	0.0926856	0.0948487	0.130368	0.155664	0.174324	0.208837	0.218731	0.220172	0.214942	0.198028	0.171245	0.147536	0.131146	0.119696	0.12171	0.134086	0.150573	0.187731	0.240216	0.294908	0.344678	0.383334	0.40548	0.408712	0.401841	0.388115	0.367338	0.34416	0.318677	0.281955	0.241796	0.217597	0.203274	0.189739	0.175051	0.155959	0.137356	0.125175	0.120071	0.117844	0.119953	0.124844	0.129603	0.131489	0.13191
1	1	1	-1	0.0213891	0.0648658	0.110981	0.130606	0.158307	0.199563	0.212133	0.210119	0.201653	0.185794	0.167149	0.145448	0.119006	0.0967912	0.0882909	0.103535	0.132062	0.161464	0.19311	0.239179	0.293191	0.341634	0.377492	0.398228	0.402206	0.388969	0.364927	0.337721	0.310272	0.282222	0.247692	0.211744	0.185118	0.173598	0.166861	0.158693	0.147037	0.13436	0.123627	0.115278	0.111426	0.111336	0.1125	0.114129	0.114743	0.114222
1	1	1	-1	0.0235799	0.0393224	0.0490996	0.0620333	0.0743578	0.0869368	0.101842	0.108885	0.112627	0.113935	0.109891	0.102784	0.0948421	0.0919144	0.0967605	0.110361	0.131006	0.157175	0.197018	0.286217	0.419393	0.561085	0.682342	0.765571	0.805138	0.801162	0.757001	0.680389	0.577451	0.451536	0.312959	0.180661	0.0839959	0.0509235	0.0505679	0.0527245	0.0508829	0.0457315	0.0405002	0.0364808	0.0340058	0.0327998	0.0315006	0.0302826	0.0292276	0.0281077
1	1	1	-1	0.0379479	0.0553815	0.0624828	0.0663117	0.0708088	0.0815535	0.0958439	0.101321	0.10421	0.107355	0.105747	0.0994682	0.0930236	0.090854	0.0962284	0.107006	0.120221	0.142254	0.185372	0.274694	0.398636	0.528882	0.636942	0.709967	0.742656	0.737221	0.697481	0.628669	0.532942	0.413491	0.284126	0.16739	0.0895119	0.0635913	0.0604775	0.0599544	0.0541675	0.0473971	0.0419363	0.0389254	0.0373092	0.0363625	0.0356317	0.0354851	0.0352674	0.0344683
1	1	1	-1	0.0268213	0.0437484	0.0644181	0.0737243	0.0807995	0.0864288	0.0964064	0.100942	0.102613	0.10125	0.0973911	0.0954279	0.0920985	0.0898335	0.0934354	0.103777	0.118474	0.140278	0.184233	0.273055	0.408485	0.552689	0.673686	0.758009	0.800835	0.800829	0.759664	0.683106	0.576108	0.446414	0.306169	0.175504	0.0834974	0.048375	0.0489556	0.0494089	0.0449321	0.039823	0.0354423	0.032299	0.0315495	0.0316952	0.0313362	0.031253	0.0307408	0.0296955
1	1	1	-1	0.0221339	0.0448243	0.0733976	0.0844864	0.102134	0.122046	0.132987	0.138704	0.138697	0.131767	0.121004	0.109466	0.0982441	0.0927627	0.0990802	0.117638	0.146159	0.188582	0.246236	0.327689	0.430221	0.532338	0.612354	0.659849	0.671884	0.652541	0.605997	0.535892	0.449292	0.351469	0.251136	0.164472	0.101173	0.0691135	0.0618189	0.0605402	0.0558008	0.0507439	0.0470299	0.0438104	0.0419866	0.0403474	0.0385054	0.0370656	0.0360429	0.0348998
1	1	1	-1	0.0109839	0.0409345	0.0635303	0.071119	0.0875791	0.104063	0.113721	0.111636	0.106421	0.0993218	0.0924156	0.0840022	0.0742818	0.0683593	0.0733129	0.0895712	0.1128	0.145013	0.194888	0.268211	0.359995	0.45213	0.526014	0.57429	0.594774	0.583608	0.543524	0.481619	0.405341	0.317582	0.223429	0.140686	0.0862872	0.0604136	0.0534032	0.0507185	0.0457155	0.0409141	0.0377099	0.0342634	0.0318967	0.0304213	0.0288614	0.0277953	0.0272721	0.0266317
1	1	1	-1	0.0215356	0.0435111	0.0596458	0.0633438	0.0735751	0.0882025	0.102442	0.106463	0.10733	0.108322	0.105602	0.0997276	0.0948557	0.0931629	0.0969594	0.110932	0.132725	0.163666	0.214842	0.296753	0.400744	0.504708	0.589314	0.643409	0.663318	0.650261	0.608197	0.539729	0.450377	0.349554	0.244619	0.15142	0.0890453	0.0627927	0.0571527	0.0547474	0.0489761	0.0429042	0.0393076	0.0368212	0.0347277	0.0331582	0.0322181	0.0318248	0.0311025	0.0300184
1	1	1	-1	0.0611595	0.0691387	0.0862584	0.10663	0.118153	0.134025	0.144008	0.143268	0.141838	0.133892	0.124672	0.117291	0.108498	0.0977769	0.0925265	0.0988631	0.114157	0.135919	0.17543	0.258111	0.373426	0.494264	0.595634	0.666742	0.705302	0.708778	0.67579	0.611935	0.525636	0.422869	0.311003	0.205231	0.130792	0.104629	0.0986005	0.0926165	0.081942	0.0710113	0.0628363	0.058142	0.0560655	0.055982	0.0573476	0.0595092	0.0608976	0.061446
1	1	1	-1	0.0309535	0.0743638	0.109614	0.119896	0.134912	0.155434	0.168875	0.169645	0.165356	0.157787	0.150521	0.141226	0.128715	0.118046	0.117494	0.130583	0.151715	0.182344	0.232768	0.322761	0.447605	0.580763	0.691425	0.767809	0.808115	0.809049	0.772395	0.703943	0.610347	0.496014	0.370637	0.254967	0.170512	0.133413	0.122459	0.115157	0.102276	0.0891098	0.080405	0.0762557	0.0756886	0.0760003	0.0758699	0.0769599	0.0790117	0.0795319
1	1	1	-1	0.0686314	0.0910164	0.103175	0.106849	0.115758	0.125228	0.132556	0.130932	0.127737	0.124853	0.118599	0.110361	0.102289	0.0982581	0.10138	0.109557	0.123316	0.145465	0.19101	0.280039	0.400223	0.524445	0.630528	0.705596	0.744249	0.746459	0.713745	0.650065	0.558656	0.444868	0.323079	0.211882	0.137219	0.108121	0.0982596	0.0902762	0.0813327	0.0724331	0.0655742	0.0622243	0.0615889	0.0620004	0.0624216	0.0634034	0.0641012	0.0640386
1	1	1	-1	0.0639303	0.111823	0.143729	0.173931	0.231307	0.273204	0.292302	0.284677	0.273618	0.254569	0.226168	0.189028	0.149869	0.122252	0.111462	0.115697	0.133431	0.161248	0.195867	0.248146	0.318302	0.386918	0.439025	0.47257	0.488472	0.489008	0.478121	0.461458	0.440028	0.410602	0.37252	0.330571	0.294795	0.277108	0.264546	0.244944	0.219614	0.195194	0.175309	0.16328	0.160935	0.166458	0.17392	0.181715	0.187724	0.189446
1	1	1	-1	0.119749	0.172884	0.219285	0.266493	0.300859	0.316934	0.313271	0.288613	0.262602	0.230413	0.194375	0.157108	0.125219	0.103588	0.0955623	0.103126	0.121206	0.149356	0.184408	0.235827	0.300011	0.36278	0.415909	0.452827	0.470935	0.472993	0.463542	0.447476	0.426042	0.396257	0.35799	0.317406	0.285075	0.26782	0.253972	0.23726	0.21806	0.197915	0.181239	0.171765	0.17106	0.17574	0.180971	0.186396	0.189425	0.18889
1	1	1	-1	0.0740925	0.104905	0.144686	0.180041	0.216048	0.252117	0.259078	0.245445	0.230224	0.204513	0.172811	0.14126	0.108085	0.0843499	0.0760285	0.0849041	0.107577	0.135665	0.170498	0.220573	0.281203	0.340776	0.387667	0.41831	0.431346	0.431765	0.4239	0.412753	0.397516	0.373515	0.341047	0.303754	0.273639	0.25685	0.24269	0.225005	0.201825	0.177308	0.158082	0.1498	0.151332	0.158812	0.167465	0.17581	0.18064	0.18179
1	1	1	-1	0.0358491	0.0579993	0.0893215	0.119117	0.168243	0.185833	0.188436	0.182242	0.176159	0.161769	0.140693	0.119675	0.0972011	0.0822708	0.0857254	0.0984061	0.114104	0.134475	0.162435	0.215622	0.291417	0.372381	0.439722	0.485846	0.51173	0.517768	0.503824	0.476967	0.440516	0.391344	0.330964	0.268031	0.216735	0.192915	0.181685	0.168969	0.151298	0.133948	0.121731	0.114073	0.11132	0.114278	0.11934	0.123391	0.125382	0.125099
1	1	1	-1	0.027283	0.0844947	0.133191	0.172076	0.207376	0.222336	0.230082	0.217578	0.201621	0.179972	0.155961	0.129746	0.104971	0.0929315	0.0954137	0.107004	0.124096	0.151306	0.189175	0.24686	0.324662	0.404298	0.47044	0.515943	0.539089	0.540072	0.524888	0.500454	0.464199	0.412891	0.351453	0.290989	0.242489	0.219567	0.210825	0.198091	0.179896	0.160995	0.144385	0.134455	0.133019	0.136361	0.139972	0.144	0.146384	0.14612
1	1	1	-1	0.0489487	0.086451	0.119702	0.132025	0.149511	0.172449	0.181874	0.176958	0.167206	0.153233	0.136396	0.117944	0.0964998	0.0794286	0.0720858	0.0775299	0.0925143	0.113739	0.145564	0.20272	0.27767	0.35377	0.417508	0.46157	0.485424	0.49053	0.478401	0.454244	0.418763	0.371075	0.315123	0.258578	0.215828	0.196259	0.184592	0.170271	0.151816	0.132667	0.118329	0.110265	0.107821	0.110576	0.115128	0.120495	0.124869	0.126197
1	1	1	-1	0.028886	0.0597542	0.0976516	0.140319	0.182256	0.209591	0.218183	0.213208	0.20635	0.189871	0.166778	0.143122	0.120501	0.102992	0.0980366	0.107029	0.120127	0.137527	0.174996	0.245327	0.341697	0.443487	0.530425	0.592727	0.628216	0.639003	0.625124	0.589414	0.53389	0.458904	0.372305	0.288516	0.227678	0.197232	0.181092	0.165001	0.146058	0.128407	0.115518	0.109329	0.108392	0.111114	0.11538	0.120217	0.123747	0.125082
1	1	1	-1	0.0397837	0.0715902	0.101081	0.136255	0.164038	0.181918	0.190607	0.183823	0.174482	0.159351	0.139497	0.118517	0.0997252	0.0857845	0.0829487	0.0924917	0.110029	0.138115	0.18017	0.249163	0.340539	0.434111	0.511303	0.564905	0.593784	0.597206	0.576634	0.537392	0.483093	0.414235	0.335205	0.260264	0.205588	0.179113	0.166442	0.153124	0.136545	0.121475	0.110642	0.104603	0.102938	0.104333	0.106134	0.107538	0.108917	0.108958
1	1	1	-1	0.0311241	0.0756584	0.11916	0.145923	0.170734	0.178023	0.180168	0.171697	0.158734	0.142266	0.12525	0.109679	0.0955992	0.0855043	0.0842632	0.093728	0.107379	0.131059	0.171261	0.240028	0.332782	0.42991	0.513083	0.575799	0.610909	0.617546	0.599334	0.558987	0.50132	0.430011	0.34704	0.267427	0.209003	0.180901	0.167184	0.154836	0.139669	0.124703	0.110728	0.101928	0.0998091	0.101389	0.104555	0.108018	0.110061	0.110351
1	1	1	-1	0.0524516	0.071333	0.0920776	0.105044	0.153291	0.210344	0.260184	0.284508	0.293323	0.289032	0.272106	0.243388	0.204686	0.180175	0.187908	0.218813	0.261444	0.314406	0.372465	0.4345	0.493421	0.533971	0.549392	0.539607	0.505877	0.45202	0.389538	0.333644	0.288137	0.24006	0.187999	0.142663	0.109185	0.0889526	0.079694	0.0733693	0.0660616	0.0595459	0.0555111	0.0526256	0.0502505	0.0481893	0.0469177	0.0468965	0.0469111	0.0463087
1	1	1	-1	0.0551948	0.0560839	0.0602912	0.063678	0.0843544	0.109656	0.134838	0.149117	0.154882	0.154284	0.146476	0.133177	0.114377	0.101752	0.109662	0.135045	0.168436	0.206806	0.250042	0.300884	0.350945	0.387608	0.404602	0.401687	0.378994	0.339672	0.290798	0.244932	0.205264	0.166347	0.126174	0.0899954	0.0662111	0.0562886	0.0520578	0.0487709	0.0440203	0.039672	0.0367121	0.0344037	0.0324102	0.0312295	0.0305346	0.0303021	0.0300672	0.0296305
1	1	1	-1	0.000221972	0.0253062	0.0519463	0.0601207	0.0750063	0.0985218	0.122913	0.132573	0.133585	0.130041	0.12325	0.112217	0.0957293	0.0841819	0.0877859	0.108762	0.143162	0.182899	0.227432	0.274085	0.317267	0.348146	0.362749	0.360878	0.339463	0.30094	0.253741	0.208093	0.168779	0.134972	0.102071	0.0725093	0.052894	0.0435928	0.0399583	0.0371465	0.0344176	0.0314604	0.028145	0.02537	0.0237437	0.0224351	0.0212602	0.0210343	0.0210634	0.0208236
1	1	1	-1	0.0558234	0.0563499	0.0669102	0.0765164	0.0847504	0.101575	0.122582	0.128584	0.131317	0.128786	0.121727	0.11383	0.10305	0.0953221	0.0981994	0.114081	0.136323	0.163495	0.212765	0.303121	0.415795	0.526061	0.614262	0.668866	0.685513	0.667304	0.619692	0.549557	0.461685	0.358181	0.244802	0.142287	0.0784392	0.0603182	0.0568608	0.0550635	0.0501693	0.0432726	0.0370555	0.0336276	0.0324189	0.0321545	0.0317267	0.031264	0.0308321	0.030339
1	1	1	-1	0.0469756	0.0592485	0.0828494	0.104372	0.10937	0.122584	0.135931	0.138092	0.137886	0.132067	0.121906	0.113258	0.104716	0.0982705	0.101724	0.117641	0.141892	0.172105	0.219664	0.303536	0.411232	0.516652	0.598661	0.648657	0.662926	0.644034	0.596672	0.527807	0.443821	0.346274	0.241358	0.14632	0.0841316	0.0650883	0.0630811	0.0599928	0.0534935	0.0465227	0.0403418	0.0361375	0.034654	0.0346712	0.0344434	0.0343628	0.0339799	0.0332093
1	1	1	-1	0.048465	0.0678955	0.0872651	0.0998953	0.101943	0.114474	0.144022	0.155596	0.159785	0.160043	0.15576	0.146051	0.135051	0.126785	0.13106	0.147785	0.171821	0.20424	0.254725	0.347164	0.471406	0.593931	0.691241	0.751467	0.769111	0.747924	0.696022	0.620376	0.528457	0.418459	0.295452	0.179858	0.101784	0.0774133	0.076046	0.0732889	0.0659546	0.0568216	0.0496335	0.0458003	0.0440657	0.0438456	0.0445391	0.0455097	0.0459962	0.0454745
1	1	1	-1	0.0325469	0.0686532	0.107185	0.123711	0.139005	0.150274	0.168155	0.171785	0.169869	0.163341	0.15187	0.141566	0.128881	0.11709	0.119877	0.13913	0.166258	0.198477	0.24422	0.324455	0.433122	0.544584	0.632814	0.686669	0.70525	0.689989	0.644535	0.577302	0.49627	0.402872	0.299331	0.198372	0.125414	0.100287	0.0967682	0.0938563	0.0855305	0.0761914	0.0693675	0.0646867	0.0625891	0.0623267	0.0629184	0.0642379	0.064803	0.064252
1	1	1	-1	0.0911748	0.110827	0.132616	0.148548	0.17015	0.183373	0.198145	0.194497	0.189939	0.180535	0.165895	0.149821	0.132564	0.119217	0.121178	0.134443	0.152696	0.184182	0.229855	0.310245	0.42284	0.53852	0.631624	0.690862	0.714545	0.704416	0.663661	0.597987	0.514239	0.412744	0.301393	0.199975	0.12665	0.100625	0.0970164	0.0919098	0.0817883	0.0708591	0.0638268	0.0611744	0.0606532	0.0609648	0.0616017	0.0624041	0.0630271	0.0629949
1	1	1	-1	0.0462983	0.0863198	0.111365	0.117762	0.138958	0.154286	0.172662	0.175359	0.17084	0.165758	0.157083	0.141268	0.120438	0.107672	0.112133	0.129057	0.154131	0.186452	0.235527	0.318817	0.43173	0.546284	0.637399	0.695119	0.714967	0.697636	0.649586	0.583161	0.500725	0.401903	0.296286	0.195548	0.126483	0.102641	0.100556	0.0989661	0.091499	0.0819504	0.0748288	0.0709874	0.0684825	0.0673153	0.0671759	0.0682969	0.0697311	0.0704392
1	1	1	-1	0.0861937	0.137028	0.185297	0.198365	0.211844	0.234861	0.254324	0.25136	0.239791	0.221922	0.19922	0.175344	0.147257	0.120004	0.112649	0.12819	0.158116	0.193565	0.233425	0.279703	0.329874	0.375949	0.407343	0.420664	0.419265	0.406087	0.384538	0.361359	0.344231	0.326185	0.300472	0.268326	0.238887	0.221229	0.20771	0.191436	0.172058	0.152991	0.139664	0.132941	0.130817	0.131655	0.134639	0.138849	0.141169	0.14073
1	1	1	-1	0.0544092	0.076811	0.106129	0.134361	0.157941	0.184113	0.202454	0.202721	0.198284	0.185029	0.165862	0.144855	0.120114	0.0990695	0.0929571	0.104403	0.126416	0.155343	0.189727	0.22968	0.273796	0.314937	0.344249	0.358834	0.360002	0.348335	0.328075	0.308161	0.290867	0.26993	0.243333	0.215111	0.190963	0.175735	0.164085	0.15111	0.13574	0.121345	0.111076	0.105227	0.103855	0.105641	0.108741	0.111785	0.114042	0.114846
1	1	1	-1	0.0895758	0.118315	0.149068	0.176126	0.205528	0.220185	0.237445	0.237831	0.230559	0.215753	0.193253	0.167797	0.142971	0.124486	0.12172	0.134561	0.154752	0.183907	0.222085	0.263947	0.309801	0.349627	0.376011	0.385822	0.381007	0.367064	0.348567	0.331374	0.315329	0.297491	0.273345	0.24699	0.223502	0.207657	0.195207	0.180798	0.16303	0.144515	0.131494	0.125565	0.124788	0.12829	0.131089	0.133257	0.13371	0.132339
1	1	1	-1	0.0962697	0.0941202	0.114573	0.156818	0.188475	0.216407	0.238373	0.234738	0.23126	0.215884	0.190592	0.16562	0.140328	0.120932	0.12249	0.142905	0.176292	0.219428	0.266861	0.330905	0.41099	0.488171	0.548041	0.583114	0.591895	0.577458	0.545181	0.505564	0.462241	0.408698	0.344339	0.27695	0.225132	0.199838	0.187042	0.172594	0.156135	0.141053	0.129743	0.122914	0.12106	0.123521	0.126424	0.128851	0.130989	0.132
1	1	1	-1	0.0632091	0.110317	0.152931	0.174548	0.19202	0.211629	0.230324	0.227726	0.218875	0.203909	0.185015	0.164631	0.142002	0.122641	0.11586	0.127421	0.152669	0.185899	0.230041	0.290021	0.360727	0.429218	0.481698	0.511288	0.518856	0.507974	0.480476	0.443159	0.402294	0.356255	0.3022	0.247456	0.205255	0.183349	0.170334	0.155953	0.138817	0.121749	0.109579	0.104604	0.104526	0.107494	0.110816	0.113672	0.115635	0.115494
1	1	1	-1	0.0256033	0.0781751	0.135183	0.15571	0.182634	0.206619	0.225252	0.218525	0.208482	0.191051	0.170675	0.148858	0.122831	0.102221	0.0993431	0.114757	0.137301	0.170675	0.215988	0.275722	0.346046	0.415202	0.46906	0.500811	0.510694	0.50104	0.475389	0.440897	0.401232	0.353279	0.298346	0.245911	0.206815	0.18795	0.177823	0.16584	0.150299	0.134825	0.122972	0.116259	0.112984	0.112947	0.115122	0.11812	0.119889	0.119945
1	1	1	-1	0.0851432	0.119457	0.162464	0.194569	0.192884	0.223013	0.239524	0.235505	0.226493	0.209251	0.18644	0.16614	0.147354	0.129597	0.122043	0.135828	0.163647	0.202993	0.254616	0.326263	0.417	0.508759	0.579061	0.621754	0.636421	0.626842	0.596592	0.55126	0.495276	0.42736	0.348861	0.27595	0.224439	0.196983	0.182915	0.169625	0.151787	0.134176	0.12026	0.112636	0.110406	0.111508	0.114548	0.117938	0.120547	0.121785
1	1	1	-1	0.0302377	0.0486681	0.0633879	0.0812991	0.118852	0.152253	0.170354	0.172806	0.172197	0.165055	0.149035	0.127564	0.10327	0.0845926	0.0824122	0.0958708	0.117803	0.143832	0.181016	0.242096	0.317845	0.39184	0.449849	0.484757	0.495925	0.484819	0.455357	0.414969	0.367331	0.310243	0.24586	0.183737	0.141454	0.125616	0.118531	0.111296	0.100119	0.088287	0.079386	0.0738489	0.0717553	0.0720886	0.0728544	0.0737763	0.0742	0.0742878
1	1	1	-1	0.0364123	0.0716821	0.103867	0.116711	0.134602	0.153885	0.163433	0.160856	0.153123	0.141288	0.128249	0.112957	0.0958315	0.0831573	0.0835361	0.0972865	0.12004	0.148689	0.186638	0.241794	0.311018	0.381263	0.437955	0.47441	0.488595	0.48146	0.457198	0.421245	0.377011	0.323247	0.262445	0.203086	0.158017	0.134554	0.123924	0.115407	0.103706	0.091133	0.0810489	0.0756134	0.0737431	0.0740656	0.0749049	0.0760742	0.0765174	0.0756945
1	1	1	-1	0.027526	0.0400227	0.0537142	0.0648735	0.0851426	0.125971	0.162742	0.174845	0.182876	0.181767	0.17134	0.155572	0.132032	0.107659	0.104294	0.128905	0.169369	0.217632	0.268004	0.318819	0.366362	0.402922	0.419567	0.411696	0.381943	0.335928	0.279095	0.225228	0.187344	0.155942	0.122723	0.0921439	0.0713381	0.0627121	0.0598394	0.0567594	0.0511124	0.0442024	0.0382498	0.0350301	0.0342302	0.0343646	0.0347591	0.0353397	0.0357985	0.0356678
1	1	1	-1	0.0207022	0.0627479	0.0911424	0.0915578	0.0990169	0.113878	0.1488	0.165231	0.170109	0.171929	0.166818	0.153676	0.135259	0.121988	0.124816	0.143038	0.173397	0.214094	0.261719	0.310547	0.356393	0.39077	0.407475	0.402536	0.374872	0.332751	0.284119	0.238748	0.202586	0.168484	0.135324	0.104754	0.0812518	0.0704577	0.0655552	0.0609963	0.056089	0.0507337	0.045558	0.0425621	0.0415274	0.0414481	0.0416461	0.0414599	0.0410216	0.0406191
1	1	1	-1	0.0263794	0.0391117	0.0592295	0.081606	0.0972995	0.127027	0.161975	0.179572	0.18727	0.185952	0.174715	0.159218	0.140087	0.122098	0.120003	0.139993	0.175119	0.215951	0.261375	0.31166	0.360105	0.396211	0.412716	0.407933	0.381458	0.338559	0.287829	0.240057	0.201756	0.168756	0.134467	0.100389	0.0757238	0.0643545	0.0598034	0.0554572	0.0497193	0.0436896	0.0383314	0.0351719	0.0350801	0.0367102	0.0379402	0.0384679	0.0387999	0.0387085
1	1	1	-1	0.000572057	0.0345003	0.0703491	0.0970017	0.109383	0.123629	0.150842	0.159985	0.16128	0.156732	0.146367	0.133154	0.116136	0.10126	0.101406	0.122112	0.155888	0.198663	0.252523	0.321444	0.398825	0.466947	0.512422	0.528915	0.514687	0.474704	0.416449	0.351939	0.290945	0.231805	0.168548	0.109622	0.0716564	0.0597876	0.058058	0.0550184	0.0490526	0.0414276	0.0345528	0.0309904	0.029982	0.0304295	0.0311809	0.0324088	0.0334869	0.0336502
1	1	1	-1	0.0299874	0.0509356	0.0848846	0.105066	0.111988	0.131299	0.157953	0.16787	0.170632	0.165572	0.154186	0.143098	0.12893	0.113651	0.115215	0.140184	0.17695	0.223138	0.277838	0.350527	0.436191	0.512434	0.563469	0.583096	0.570836	0.532448	0.474057	0.405407	0.338454	0.270017	0.19651	0.128473	0.0806746	0.0641	0.0619389	0.0580769	0.0510187	0.0437963	0.0383111	0.0353182	0.0344117	0.0350027	0.0364704	0.0377868	0.038446	0.0386934
1	1	1	-1	0.0371735	0.0687638	0.094444	0.0962173	0.104138	0.12658	0.154128	0.161405	0.162663	0.158855	0.150257	0.137112	0.119248	0.10288	0.0995464	0.117697	0.152163	0.194938	0.245026	0.305569	0.374043	0.435268	0.477374	0.493588	0.482887	0.449764	0.399382	0.340314	0.282544	0.2272	0.16943	0.113669	0.0750568	0.05907	0.0550846	0.0518863	0.0475042	0.0424016	0.0374439	0.0344483	0.0333154	0.0327102	0.0325148	0.0326504	0.0330822	0.0332091
1	1	1	-1	0.0363493	0.053752	0.0749734	0.0898261	0.109581	0.138689	0.178552	0.192226	0.196875	0.191965	0.182992	0.170973	0.151477	0.131356	0.128381	0.150608	0.189004	0.238631	0.30444	0.402176	0.517903	0.623949	0.702237	0.744504	0.748589	0.714963	0.646736	0.557679	0.464586	0.366788	0.26	0.1596	0.0928056	0.071033	0.0665522	0.0627806	0.0572997	0.0511355	0.0460032	0.043304	0.0422906	0.0419234	0.0420005	0.0418272	0.0411142	0.0401372
1	1	1	-1	0.00368835	0.0426233	0.0795368	0.0950294	0.110757	0.129217	0.153914	0.161159	0.161924	0.156279	0.147776	0.134989	0.11964	0.110613	0.112873	0.126381	0.152274	0.190032	0.244326	0.328164	0.434325	0.537078	0.615608	0.659398	0.666061	0.639145	0.584754	0.510993	0.423288	0.32612	0.225158	0.133486	0.0735243	0.0529926	0.0518846	0.0512712	0.046653	0.0407071	0.035041	0.0312185	0.0290979	0.0282355	0.0282376	0.0284576	0.0285567	0.0283312
1	1	1	-1	0.0262614	0.0508935	0.0665126	0.0644741	0.0677476	0.0972871	0.131191	0.147309	0.152756	0.153895	0.151992	0.143823	0.127663	0.113557	0.112322	0.131358	0.164408	0.204333	0.256268	0.334981	0.434507	0.52713	0.594098	0.630245	0.633607	0.603089	0.545656	0.474913	0.397149	0.312286	0.219691	0.133065	0.0746543	0.0543811	0.0540251	0.0523017	0.0463337	0.0400783	0.0345441	0.0307441	0.028929	0.0281	0.0276929	0.0277121	0.02816	0.0285369
1	1	1	-1	0.0236461	0.0532903	0.0856859	0.114453	0.13759	0.167714	0.194413	0.206224	0.208422	0.201466	0.18615	0.166355	0.141952	0.120257	0.118487	0.139935	0.172441	0.212477	0.255485	0.303674	0.350339	0.384496	0.401151	0.39866	0.376256	0.338846	0.293344	0.25214	0.223018	0.1967	0.16591	0.136816	0.11524	0.103828	0.0960346	0.0881628	0.0800803	0.0724138	0.0655942	0.0620076	0.0618066	0.0634821	0.0648584	0.0663949	0.0678101	0.0680787
1	1	1	-1	0.0426188	0.0825421	0.120635	0.148379	0.164064	0.199065	0.234011	0.240495	0.238315	0.229526	0.212928	0.190205	0.16413	0.140223	0.133157	0.151191	0.187878	0.235054	0.285861	0.335784	0.384613	0.422621	0.442824	0.441064	0.418138	0.378951	0.332246	0.290141	0.256902	0.226517	0.196542	0.166899	0.14225	0.128751	0.121883	0.113955	0.102917	0.0908658	0.0823429	0.0781649	0.0776721	0.0806801	0.0830345	0.0843716	0.0854572	0.085406
1	1	1	-1	0.0299602	0.0398623	0.0665281	0.0980531	0.128877	0.172012	0.202038	0.215035	0.221061	0.213704	0.198159	0.179926	0.154777	0.129866	0.126764	0.145135	0.178734	0.216722	0.259258	0.309083	0.356617	0.390181	0.405467	0.402051	0.380688	0.34384	0.297625	0.255236	0.224607	0.196099	0.165462	0.136488	0.118379	0.110805	0.104512	0.0961295	0.0865234	0.0779348	0.0704169	0.0649613	0.0635462	0.0641282	0.0642389	0.0647229	0.0648276	0.0645822
1	1	1	-1	0.00132464	0.0809605	0.156658	0.17757	0.180187	0.183654	0.19914	0.198375	0.186064	0.171669	0.158266	0.146054	0.130159	0.118638	0.123964	0.146204	0.176313	0.217473	0.267427	0.331594	0.407046	0.473951	0.520958	0.541729	0.535393	0.508213	0.462963	0.410263	0.360418	0.305544	0.241746	0.182389	0.139583	0.121151	0.113491	0.103742	0.0912625	0.0790887	0.071243	0.0679454	0.0671169	0.0688304	0.0714377	0.0739614	0.0755507	0.0753077
1	1	1	-1	0.0505685	0.0658236	0.0858861	0.108678	0.12728	0.164312	0.185595	0.186938	0.187114	0.180128	0.166489	0.147472	0.126113	0.10919	0.110052	0.131093	0.163016	0.197644	0.234974	0.28778	0.355031	0.418419	0.462364	0.482408	0.476649	0.449242	0.408775	0.364496	0.321041	0.270582	0.211504	0.154194	0.114852	0.100458	0.0979409	0.093662	0.0848303	0.0754946	0.0677383	0.0629923	0.0619249	0.0636235	0.0656598	0.0672893	0.0681903	0.0678096
1	1	1	-1	0.0463625	0.0714038	0.0899843	0.100192	0.125035	0.14805	0.164255	0.169515	0.170898	0.167263	0.158315	0.141662	0.118722	0.10343	0.111677	0.139064	0.175761	0.216251	0.259024	0.315063	0.378847	0.437548	0.47881	0.495999	0.486565	0.452969	0.404471	0.355083	0.312445	0.264688	0.210671	0.157784	0.118461	0.101576	0.0951725	0.0908035	0.0847121	0.0777434	0.0706668	0.0655763	0.0639147	0.0646884	0.0654247	0.0659108	0.0662633	0.066039
1	1	1	-1	0.020567	0.0444495	0.0667148	0.0793944	0.0911367	0.111038	0.125649	0.133182	0.135977	0.133975	0.125163	0.113729	0.101204	0.0940171	0.100754	0.123558	0.158667	0.196757	0.238451	0.303142	0.385894	0.462716	0.51753	0.544529	0.54262	0.51645	0.4724	0.41924	0.361277	0.297718	0.228507	0.160741	0.110896	0.0930974	0.0892086	0.0820352	0.0728756	0.0650095	0.0585003	0.054343	0.0534072	0.0546507	0.055406	0.0559894	0.0561748	0.0555825
1	1	1	-1	0.0293297	0.0499971	0.0789907	0.100632	0.10647	0.137043	0.156701	0.159622	0.159001	0.150546	0.138359	0.126076	0.111329	0.0975388	0.0977436	0.116748	0.148229	0.18358	0.222657	0.287803	0.375386	0.459612	0.522108	0.55719	0.564139	0.544993	0.503684	0.448842	0.389507	0.31986	0.239889	0.162995	0.109312	0.0918014	0.0906295	0.0864088	0.0786516	0.0708802	0.064039	0.0588929	0.0561999	0.0556412	0.0560346	0.0563034	0.0560105	0.0551997
1	1	1	-1	0.0320167	0.0495886	0.0645349	0.069028	0.0898466	0.123198	0.142497	0.145215	0.145328	0.139659	0.130389	0.11759	0.100275	0.0853995	0.0856944	0.103949	0.129344	0.158937	0.196718	0.257802	0.337041	0.411308	0.466576	0.499092	0.508395	0.493606	0.45842	0.411303	0.356721	0.292439	0.22038	0.153012	0.105417	0.0883184	0.0844289	0.0773028	0.0680957	0.0603622	0.0543446	0.0502133	0.0493182	0.0502991	0.051247	0.0521899	0.0521476	0.0513822
1	1	1	-1	0	0.0650581	0.0895955	0.14841	0.162658	0.222302	0.242388	0.247485	0.242124	0.236177	0.213841	0.177801	0.15419	0.134431	0.117645	0.139011	0.186436	0.221767	0.25847	0.306756	0.345728	0.378531	0.402488	0.404335	0.384802	0.358114	0.326999	0.292247	0.271196	0.260423	0.237257	0.20984	0.188624	0.170278	0.156719	0.149254	0.136818	0.121378	0.111449	0.107324	0.105343	0.107243	0.111921	0.115763	0.117928	0.118824
1	1	1	-1	0.0825672	0.0913718	0.110776	0.131302	0.151383	0.198768	0.234156	0.237618	0.238838	0.228405	0.209729	0.18572	0.154865	0.126769	0.118707	0.135051	0.170838	0.215532	0.259339	0.301272	0.342499	0.375007	0.391946	0.390209	0.370638	0.339806	0.303203	0.272072	0.254215	0.239082	0.219059	0.196869	0.17822	0.166498	0.158427	0.147987	0.134436	0.119567	0.10671	0.0996131	0.0971557	0.0980504	0.100346	0.10237	0.102947	0.102437
1	1	1	-1	0.285324	0.154633	0.110224	0.21041	0.196294	0.23396	0.253636	0.262801	0.267347	0.251427	0.219739	0.192712	0.175144	0.155623	0.145758	0.160731	0.203561	0.254031	0.300345	0.353354	0.403598	0.4364	0.447179	0.442605	0.422183	0.384137	0.340456	0.310698	0.287151	0.262874	0.244332	0.226365	0.202938	0.186306	0.1783	0.165074	0.14582	0.128964	0.119658	0.11312	0.10922	0.111925	0.116935	0.119854	0.120445	0.120876
1	1	1	-1	0.0758887	0.121173	0.15994	0.176988	0.182583	0.20274	0.219561	0.223383	0.217924	0.207924	0.192194	0.17519	0.156222	0.140651	0.141119	0.16049	0.191195	0.229952	0.275896	0.337977	0.408563	0.46988	0.511859	0.529875	0.524803	0.49929	0.458531	0.412867	0.367795	0.318993	0.264829	0.213362	0.176517	0.159663	0.149518	0.137924	0.125202	0.11325	0.103799	0.0981187	0.0961313	0.0972481	0.0997621	0.103898	0.106556	0.106445
1	1	1	-1	0.0607398	0.0863343	0.106013	0.116478	0.147839	0.181368	0.207361	0.217018	0.217491	0.211333	0.195344	0.173065	0.146789	0.122949	0.120152	0.14046	0.168673	0.203411	0.246525	0.301217	0.362888	0.415595	0.451561	0.467709	0.462096	0.440671	0.40733	0.369948	0.336323	0.298058	0.252576	0.206865	0.171564	0.152155	0.139769	0.127349	0.113355	0.100107	0.0900015	0.0851431	0.0845793	0.0863486	0.0880052	0.0895687	0.0905166	0.090281
1	1	1	-1	0.0585562	0.0926075	0.126669	0.134383	0.145167	0.161422	0.182774	0.186337	0.183643	0.174912	0.161539	0.14504	0.122537	0.105608	0.106305	0.122054	0.148483	0.183888	0.229593	0.28405	0.342447	0.395754	0.433211	0.447375	0.440369	0.417134	0.380964	0.342521	0.307425	0.267622	0.223087	0.181124	0.150908	0.13404	0.124522	0.115456	0.10339	0.0901761	0.0809147	0.0761616	0.073823	0.0744069	0.0760929	0.0780524	0.0797714	0.0800777
1	1	-1	1	0.00398087	0.0247381	0.0423906	0.0523192	0.0646578	0.0789236	0.0898343	0.094142	0.0931068	0.0886858	0.0806855	0.0686207	0.0544121	0.0438325	0.0431335	0.0539471	0.0701015	0.0872022	0.104993	0.120304	0.130943	0.134566	0.132875	0.127541	0.118013	0.10771	0.103858	0.111621	0.129005	0.150046	0.167532	0.178805	0.183215	0.180348	0.170275	0.153695	0.133929	0.11293	0.0929399	0.0771961	0.0679638	0.0635811	0.0615732	0.0616832	0.0619306	0.0619749
1	1	-1	1	0.0144379	0.0407049	0.0608375	0.0864122	0.112369	0.135752	0.153572	0.155783	0.151996	0.143364	0.128046	0.109456	0.091705	0.0785901	0.0773527	0.0885357	0.109352	0.135952	0.162006	0.182132	0.195288	0.200394	0.198614	0.190779	0.176819	0.16148	0.152489	0.15565	0.171427	0.192685	0.210797	0.223036	0.227193	0.222386	0.210135	0.192212	0.169554	0.143106	0.116251	0.0948159	0.0825647	0.077211	0.0747915	0.0745042	0.0749185	0.0759223
1	1	-1	1	0.0762727	0.0705333	0.0697037	0.0707725	0.0873021	0.10761	0.123129	0.128106	0.129674	0.124823	0.115338	0.100436	0.0816992	0.0677404	0.0642874	0.0695445	0.0819975	0.0989008	0.115775	0.129056	0.139117	0.143986	0.143593	0.138074	0.128153	0.118152	0.115077	0.121327	0.134763	0.151466	0.166317	0.176084	0.178147	0.173741	0.1643	0.150211	0.131789	0.111064	0.092062	0.0780054	0.0697833	0.0653337	0.0634179	0.0642416	0.0652376	0.0656901
1	1	-1	1	0.00695349	0.0172905	0.0475378	0.0533957	0.0509013	0.0849017	0.0951609	0.100789	0.102096	0.0939186	0.0827089	0.0755145	0.0631697	0.0452926	0.0316814	0.0380707	0.0611713	0.083296	0.0979128	0.109682	0.123473	0.134733	0.137689	0.131501	0.121996	0.11687	0.116323	0.121013	0.135547	0.160891	0.185326	0.198979	0.201673	0.197188	0.189694	0.176861	0.154675	0.12581	0.0988809	0.0807912	0.0694134	0.0622076	0.0585681	0.0596146	0.0619058	0.0633009
1	1	-1	1	0.0237995	0.0225483	0.0174298	0.0250263	0.0332115	0.0435869	0.054453	0.0591751	0.0615401	0.0630617	0.0571007	0.0480819	0.0386884	0.0295612	0.0299803	0.0361334	0.0475085	0.0664041	0.0794718	0.0911804	0.100894	0.105191	0.107719	0.103831	0.0943003	0.0861324	0.0823595	0.0935693	0.11541	0.137947	0.158801	0.171537	0.177117	0.177694	0.169552	0.155331	0.135192	0.109213	0.0851952	0.0662387	0.0540002	0.0517477	0.0502473	0.0504687	0.0517991	0.0525233
1	1	-1	1	0	0.0375645	0.0798992	0.101873	0.0953554	0.0773962	0.0722581	0.0859688	0.0873283	0.0854639	0.0821184	0.0785588	0.0702525	0.0613838	0.0593124	0.0663988	0.0791546	0.0915169	0.104137	0.120203	0.132634	0.1384	0.137547	0.13125	0.122209	0.112762	0.107665	0.1138	0.133381	0.159023	0.179222	0.188708	0.191081	0.186897	0.17512	0.157223	0.135237	0.11233	0.0925554	0.0778136	0.0683602	0.063155	0.0609708	0.060732	0.0601134	0.0606554
1	1	-1	1	0.100623	0.0902323	0.0936774	0.126639	0.153071	0.176289	0.200663	0.201771	0.199503	0.18573	0.163443	0.137771	0.113441	0.0981474	0.0948749	0.103146	0.123896	0.156189	0.188881	0.213128	0.227752	0.234093	0.23395	0.226812	0.212199	0.195936	0.184993	0.184601	0.193666	0.207787	0.219917	0.22709	0.22688	0.219544	0.207143	0.192816	0.176786	0.158607	0.141196	0.129137	0.12262	0.119951	0.119778	0.121064	0.120901	0.119843
1	1	-1	1	0.0187893	0.0415017	0.0716166	0.0884871	0.110756	0.141618	0.158569	0.158414	0.153921	0.143026	0.128938	0.111768	0.0889676	0.0704436	0.0663599	0.0770356	0.100023	0.126583	0.149597	0.168228	0.179874	0.183184	0.17987	0.172071	0.160023	0.144502	0.131006	0.128222	0.136915	0.150399	0.163353	0.171018	0.17347	0.170439	0.161618	0.149678	0.135389	0.120493	0.107202	0.0958577	0.0881827	0.084619	0.0829291	0.0829112	0.0831893	0.0835171
1	1	-1	1	0.014595	0.026013	0.0466724	0.0635741	0.0943718	0.140171	0.169621	0.177714	0.18147	0.174969	0.160557	0.139174	0.111241	0.0858306	0.0741916	0.0803047	0.0969417	0.11789	0.139229	0.156885	0.170194	0.177632	0.179475	0.175587	0.164896	0.152716	0.146305	0.149652	0.162507	0.176661	0.186072	0.192068	0.1934	0.18857	0.179667	0.167739	0.153087	0.136483	0.121035	0.111022	0.106191	0.103907	0.102664	0.101558	0.100957	0.100195
1	1	-1	1	0.0735098	0.0473686	0.0199866	0.0182327	0.0446021	0.0652203	0.0781405	0.0842502	0.0905155	0.0921825	0.0838963	0.0679454	0.0490587	0.0345629	0.0310915	0.0347747	0.0433549	0.0564486	0.069557	0.0835157	0.0965949	0.106342	0.111852	0.111029	0.10668	0.105362	0.11178	0.128142	0.151781	0.17773	0.199676	0.2145	0.22206	0.22154	0.211092	0.192048	0.166581	0.137863	0.112315	0.0945917	0.0842755	0.0795684	0.0787409	0.0810777	0.0835372	0.0858588
1	1	-1	1	0.0407726	0.0509103	0.0564145	0.057387	0.0748968	0.0944035	0.109605	0.112242	0.111875	0.107443	0.097868	0.0823557	0.0632385	0.0480995	0.0427079	0.047748	0.0592931	0.07508	0.0925476	0.108289	0.11997	0.128267	0.133338	0.133963	0.132081	0.131161	0.136524	0.153744	0.178565	0.204785	0.226009	0.23871	0.243096	0.238869	0.225558	0.205184	0.179101	0.151019	0.125782	0.106636	0.09607	0.0933689	0.0937752	0.0959404	0.0974637	0.0991573
1	1	-1	1	0.081056	0.0639104	0.0485455	0.0538879	0.0663662	0.078523	0.092367	0.0958961	0.0985655	0.0976321	0.0892335	0.0756249	0.0599519	0.0478841	0.0432646	0.047054	0.0577644	0.0730368	0.0888692	0.102181	0.112361	0.119928	0.124971	0.125544	0.121265	0.116383	0.118195	0.133303	0.15831	0.186649	0.209402	0.222663	0.227851	0.224218	0.212613	0.19475	0.170418	0.142383	0.115521	0.0947914	0.0834845	0.0815894	0.0834703	0.0872226	0.090039	0.0918389
1	1	-1	1	0.114393	0.103429	0.100478	0.12421	0.181161	0.229082	0.265726	0.267082	0.269907	0.259935	0.236715	0.20168	0.160024	0.128419	0.116861	0.123085	0.143723	0.173804	0.204099	0.226573	0.242654	0.253716	0.258675	0.25491	0.245398	0.235954	0.236526	0.252243	0.280749	0.316454	0.344589	0.35895	0.364831	0.360918	0.345209	0.321253	0.289233	0.254738	0.226869	0.208262	0.199634	0.198161	0.201683	0.20873	0.211608	0.212194
1	1	-1	1	0.110551	0.113417	0.130627	0.170982	0.204101	0.237825	0.264782	0.267312	0.264024	0.249523	0.221922	0.189307	0.155019	0.124926	0.106413	0.106347	0.120023	0.139689	0.164372	0.18609	0.201234	0.210874	0.216692	0.215542	0.208146	0.203289	0.207098	0.221843	0.24409	0.271894	0.295262	0.30598	0.307844	0.302147	0.28903	0.270154	0.245248	0.216612	0.191779	0.176741	0.169392	0.168241	0.171426	0.176721	0.179413	0.179263
1	1	-1	1	0.19941	0.198189	0.18195	0.170111	0.20442	0.238674	0.271694	0.276075	0.275218	0.269479	0.246415	0.210521	0.169234	0.132619	0.111627	0.108908	0.121012	0.143226	0.172654	0.198238	0.217045	0.231047	0.239681	0.240788	0.235778	0.230028	0.229642	0.236757	0.254673	0.28056	0.306342	0.320791	0.326097	0.322468	0.307492	0.288539	0.265942	0.24146	0.219006	0.20093	0.190061	0.186412	0.189998	0.197009	0.202778	0.204213
1	1	-1	1	0.0893097	0.0764071	0.0677648	0.0816415	0.108714	0.134601	0.155779	0.159972	0.161191	0.154629	0.138436	0.115736	0.0898998	0.0671492	0.0540077	0.0533671	0.0625344	0.0769801	0.0948354	0.11156	0.124487	0.133336	0.138495	0.139151	0.137036	0.132732	0.13097	0.138688	0.155517	0.176808	0.194393	0.204521	0.208763	0.206816	0.198088	0.183795	0.165237	0.145073	0.126392	0.110144	0.100333	0.0988238	0.100773	0.104082	0.106186	0.107037
1	1	-1	1	0.102859	0.0755992	0.0663575	0.0962327	0.130965	0.152575	0.170237	0.172159	0.174504	0.164981	0.146169	0.121986	0.0959886	0.0774148	0.068029	0.0690685	0.0812317	0.10021	0.119789	0.136767	0.150641	0.160792	0.167183	0.167294	0.162555	0.1563	0.157587	0.171845	0.194685	0.223188	0.248108	0.262799	0.268674	0.267159	0.257162	0.239831	0.216002	0.187724	0.160643	0.139882	0.129521	0.127666	0.128626	0.131939	0.13449	0.136587
1	1	-1	1	0.112711	0.0926878	0.086778	0.10737	0.128353	0.149707	0.170027	0.171166	0.172996	0.165971	0.147659	0.125284	0.101168	0.080131	0.0680165	0.0665739	0.0749438	0.0913359	0.110935	0.128138	0.142082	0.154359	0.161822	0.16189	0.157267	0.155128	0.161495	0.178552	0.202649	0.227707	0.247374	0.258134	0.262095	0.258779	0.246688	0.227051	0.20016	0.170873	0.145822	0.129801	0.122897	0.122895	0.125692	0.128948	0.130453	0.131452
1	1	-1	1	0.063084	0.0530501	0.0504155	0.0701638	0.101835	0.123743	0.149518	0.149852	0.151917	0.145886	0.130555	0.109148	0.0841771	0.0668816	0.0603002	0.062195	0.0735357	0.0925737	0.113554	0.127653	0.137417	0.145811	0.150307	0.150296	0.146014	0.141766	0.146611	0.167428	0.198823	0.233056	0.262024	0.28016	0.287418	0.284415	0.271798	0.250612	0.221359	0.189431	0.159	0.135302	0.123315	0.121567	0.123876	0.127473	0.130044	0.132163
1	1	-1	1	0.028856	0.0212148	0.0225135	0.0487592	0.0731618	0.0974777	0.116273	0.119205	0.122249	0.118494	0.106169	0.0898942	0.0718403	0.0566301	0.0486518	0.0495059	0.059431	0.0753799	0.0916948	0.104766	0.114604	0.122359	0.12882	0.132043	0.131059	0.131593	0.138445	0.153667	0.177739	0.205769	0.228806	0.242239	0.247053	0.24261	0.229007	0.209614	0.184738	0.15704	0.131735	0.114092	0.104175	0.100659	0.102647	0.107066	0.109159	0.110614
1	1	-1	1	0.04525	0.051152	0.0516417	0.070032	0.0947659	0.109137	0.121675	0.119887	0.11764	0.1118	0.0995812	0.0812606	0.0622532	0.0498908	0.045177	0.0489564	0.0597475	0.075172	0.0907863	0.104825	0.116094	0.124811	0.13079	0.131512	0.129992	0.129195	0.133848	0.149258	0.173394	0.201098	0.224181	0.237073	0.241204	0.238956	0.22888	0.210617	0.185034	0.157024	0.13299	0.114409	0.104001	0.101794	0.104106	0.108119	0.110501	0.111475
1	1	-1	1	0.0174151	0.036343	0.0563822	0.0675465	0.0873654	0.116962	0.158437	0.173962	0.179337	0.175999	0.164853	0.146073	0.120683	0.100652	0.0980861	0.111411	0.137714	0.17315	0.20866	0.232557	0.243795	0.241923	0.228604	0.204396	0.171319	0.135398	0.104115	0.0873976	0.0877257	0.0957092	0.102403	0.106178	0.106289	0.102152	0.095081	0.0861428	0.0751738	0.0631033	0.0526929	0.0455549	0.0409498	0.0383354	0.0372118	0.0370898	0.0369742	0.0369101
1	1	-1	1	0.00284757	0.0419437	0.0784156	0.113272	0.164238	0.212959	0.241865	0.24491	0.241799	0.228077	0.205953	0.17679	0.145367	0.127262	0.13407	0.164168	0.208355	0.258152	0.298477	0.32419	0.336858	0.332654	0.312487	0.28067	0.241516	0.198688	0.161601	0.143358	0.143983	0.154624	0.163187	0.167206	0.166116	0.159711	0.149642	0.136652	0.121313	0.106271	0.0933549	0.0828079	0.0765885	0.0747973	0.0742393	0.073544	0.072605	0.0721512
1	1	-1	1	0.0479488	0.06098	0.0846376	0.100376	0.117697	0.157252	0.193631	0.209959	0.215795	0.209397	0.19426	0.17388	0.146554	0.120474	0.115842	0.13435	0.169683	0.212546	0.250826	0.279963	0.296461	0.296711	0.282157	0.253262	0.213594	0.170543	0.131591	0.108091	0.106377	0.114533	0.12287	0.127425	0.127495	0.123876	0.117322	0.108145	0.0956127	0.0816986	0.069874	0.0613758	0.0561652	0.0531901	0.0517436	0.0514906	0.0514224	0.050986
1	1	-1	1	0.0852106	0.0602496	0.0388657	0.0442353	0.0583503	0.0816073	0.112217	0.122267	0.131648	0.135751	0.129549	0.115802	0.0982549	0.0833785	0.079848	0.0908294	0.114039	0.145997	0.175506	0.195918	0.207476	0.211426	0.208133	0.195326	0.172687	0.148542	0.131219	0.128035	0.141309	0.16314	0.18271	0.193783	0.196258	0.192094	0.182525	0.167336	0.146215	0.121152	0.0965299	0.0785259	0.068039	0.0637368	0.0626053	0.0632077	0.0627795	0.0624466
1	1	-1	1	0.0633031	0.0362994	0.0187547	0.0222729	0.0404079	0.0535084	0.0836261	0.0985213	0.110441	0.115355	0.112092	0.100441	0.0825661	0.0694985	0.0694488	0.0796879	0.0968647	0.120408	0.14719	0.166289	0.176778	0.17897	0.174341	0.161628	0.139646	0.113972	0.0954816	0.0931694	0.106984	0.127019	0.144555	0.155257	0.159399	0.156763	0.147522	0.133426	0.11508	0.0937992	0.0722828	0.0556653	0.0458858	0.0423245	0.0431658	0.0443385	0.044314	0.044619
1	1	-1	1	0.0416027	0.0470885	0.0458118	0.0463612	0.057314	0.0783249	0.111486	0.126221	0.133948	0.138235	0.133801	0.120788	0.101333	0.0847121	0.0787117	0.0835323	0.100187	0.125954	0.150033	0.166442	0.175467	0.176309	0.170642	0.156885	0.135728	0.112511	0.0949788	0.0917431	0.103671	0.121711	0.137271	0.145478	0.147125	0.143201	0.133599	0.120206	0.103106	0.0833308	0.0648223	0.0514541	0.0440912	0.0419474	0.0423543	0.0430962	0.0432099	0.043073
1	1	-1	1	0.0625129	0.0681986	0.0761812	0.0890578	0.0998065	0.109352	0.123578	0.127525	0.127603	0.123213	0.114072	0.100543	0.0839834	0.0717995	0.0681025	0.0735689	0.08837	0.109027	0.129857	0.146834	0.157911	0.163259	0.162843	0.155272	0.141232	0.125089	0.112806	0.112529	0.125619	0.14466	0.161481	0.172125	0.176581	0.17483	0.166449	0.152729	0.133585	0.111289	0.0898754	0.0732718	0.0628184	0.0598593	0.0611767	0.0630653	0.0638546	0.0651363
1	1	-1	1	0.109907	0.0766913	0.0471907	0.0640588	0.0815633	0.106834	0.138687	0.147241	0.154721	0.153643	0.14103	0.119207	0.0949412	0.0765974	0.0688847	0.074006	0.0928272	0.119783	0.145369	0.163109	0.173885	0.178274	0.175743	0.164089	0.145262	0.125018	0.111628	0.11407	0.132454	0.156376	0.175603	0.186804	0.190949	0.188396	0.17925	0.164969	0.144547	0.120498	0.0982155	0.0816621	0.0726165	0.0705296	0.0710035	0.0723943	0.0736822	0.074719
1	1	-1	1	0.0491216	0.0416145	0.0343027	0.0415536	0.0556331	0.0851694	0.113151	0.127057	0.135564	0.138044	0.1323	0.11812	0.097463	0.0798464	0.0727608	0.0788069	0.0973165	0.119765	0.141549	0.160262	0.172869	0.177431	0.174698	0.164139	0.146255	0.125075	0.109342	0.10884	0.122046	0.141588	0.159641	0.171149	0.176832	0.177116	0.170867	0.158272	0.139729	0.117287	0.0953566	0.0783555	0.0683798	0.0643472	0.0633562	0.0646863	0.0657606	0.0667823
1	1	-1	1	0.200044	0.113533	0.0630578	0.096604	0.149479	0.193184	0.228209	0.234722	0.245568	0.236304	0.209389	0.173694	0.133347	0.104629	0.098222	0.109906	0.134704	0.168233	0.203858	0.232226	0.249978	0.257016	0.253705	0.238047	0.214741	0.188625	0.167728	0.164692	0.177455	0.196597	0.213377	0.223832	0.228481	0.226055	0.216973	0.202237	0.182102	0.160685	0.1434	0.130677	0.12321	0.121926	0.123824	0.127575	0.129039	0.128679
1	1	-1	1	0.18476	0.1321	0.0880578	0.108225	0.142046	0.19345	0.241167	0.25455	0.266599	0.266203	0.246062	0.213416	0.175937	0.143958	0.125414	0.128766	0.15061	0.181202	0.215118	0.243095	0.262101	0.272224	0.272152	0.261693	0.242907	0.220081	0.201539	0.197655	0.207197	0.222878	0.236574	0.243792	0.246035	0.243075	0.233997	0.219502	0.200004	0.178734	0.160836	0.148121	0.141244	0.140818	0.143159	0.146429	0.148726	0.149418
1	1	-1	1	0.237991	0.177136	0.130969	0.125321	0.154329	0.183714	0.208543	0.21541	0.223244	0.218436	0.200762	0.172157	0.135934	0.106762	0.0964218	0.104532	0.127363	0.156352	0.185052	0.208855	0.226717	0.2361	0.236096	0.224872	0.20506	0.179851	0.157439	0.149993	0.159487	0.177637	0.193535	0.200556	0.202409	0.200233	0.192159	0.178674	0.161165	0.142281	0.12567	0.112717	0.105829	0.106629	0.11035	0.114644	0.116886	0.117684
1	1	-1	1	0.12922	0.12087	0.117566	0.141914	0.18053	0.213457	0.255546	0.266232	0.271119	0.262172	0.239015	0.203555	0.161893	0.131616	0.117687	0.119247	0.135486	0.165183	0.201567	0.23098	0.249505	0.258489	0.260107	0.248759	0.227937	0.207206	0.194351	0.197652	0.215458	0.240119	0.262334	0.275675	0.280187	0.275745	0.262686	0.243003	0.217601	0.187906	0.162808	0.14695	0.137482	0.133113	0.133313	0.136987	0.139021	0.138955
1	1	-1	1	0.117906	0.0845664	0.0682765	0.0783791	0.0929684	0.11538	0.139222	0.146296	0.152273	0.149437	0.137229	0.121746	0.101817	0.0838347	0.0780707	0.0853537	0.103491	0.128338	0.152363	0.172143	0.184204	0.188767	0.187749	0.180114	0.16616	0.151513	0.142382	0.146973	0.16382	0.185459	0.204534	0.215479	0.218621	0.214453	0.202774	0.185704	0.164608	0.141405	0.119892	0.104985	0.0971763	0.0958601	0.0971233	0.0991099	0.100491	0.100585
1	1	-1	1	0.120077	0.0879089	0.0682147	0.0749105	0.0964237	0.12082	0.154796	0.16809	0.17706	0.176017	0.163791	0.143486	0.115348	0.092848	0.0825471	0.0838485	0.0977798	0.120255	0.145384	0.165603	0.179657	0.186723	0.186403	0.178094	0.164517	0.148537	0.13582	0.137599	0.153421	0.175649	0.194436	0.204077	0.206064	0.202557	0.192821	0.177846	0.158504	0.136814	0.117587	0.103237	0.0940121	0.0920344	0.0948272	0.0986694	0.0999769	0.0996794
1	1	-1	1	0.121298	0.104997	0.0871978	0.0839498	0.0855816	0.0997333	0.137561	0.156694	0.168547	0.175047	0.170209	0.155594	0.132627	0.110471	0.0941133	0.0889083	0.0994407	0.123663	0.151912	0.176042	0.192581	0.202917	0.205428	0.197569	0.179762	0.157068	0.138344	0.134531	0.145976	0.167945	0.190278	0.206598	0.217264	0.219859	0.213017	0.199652	0.17969	0.15502	0.129592	0.108765	0.095655	0.0910704	0.0920914	0.0956737	0.0997015	0.104094
1	1	-1	1	0.0976299	0.0733997	0.0596083	0.0776566	0.0973967	0.118629	0.146903	0.158998	0.166181	0.1644	0.150126	0.130597	0.108654	0.0888112	0.0805505	0.0882547	0.105157	0.125972	0.150511	0.173127	0.186428	0.192588	0.192749	0.183732	0.168422	0.153531	0.145083	0.15054	0.168852	0.193292	0.213357	0.224082	0.22773	0.225243	0.214977	0.198556	0.176386	0.150954	0.129102	0.113009	0.102898	0.0990988	0.0982372	0.0992684	0.100205	0.101308
1	1	-1	1	0.0646436	0.0666302	0.0657649	0.0862749	0.110984	0.135231	0.155928	0.162056	0.164113	0.16118	0.147003	0.124794	0.100512	0.0815878	0.0716108	0.0769036	0.094038	0.114683	0.138393	0.159782	0.174825	0.183779	0.187142	0.182025	0.169502	0.154308	0.14428	0.146904	0.161079	0.182538	0.202029	0.213576	0.218643	0.216864	0.207699	0.192983	0.172116	0.147797	0.126001	0.109123	0.0990049	0.0968446	0.0983315	0.101687	0.104338	0.105737
1	1	-1	1	0.0693322	0.0518423	0.0437217	0.063669	0.0780382	0.109517	0.166993	0.193199	0.21306	0.220515	0.213566	0.196412	0.170337	0.146821	0.142693	0.162906	0.200281	0.24958	0.29884	0.33195	0.34821	0.348549	0.331569	0.295676	0.245819	0.189491	0.135978	0.102792	0.097698	0.106333	0.115856	0.120948	0.122869	0.121529	0.115524	0.106418	0.0944805	0.0810398	0.0691959	0.0601814	0.053438	0.0497826	0.0486776	0.0483573	0.0478195	0.0479446
1	1	-1	1	0.092065	0.0677958	0.0472856	0.0582815	0.0762155	0.113591	0.171736	0.19891	0.217021	0.223684	0.214237	0.191056	0.157538	0.126319	0.11731	0.134324	0.170769	0.219882	0.266701	0.297694	0.313661	0.314271	0.297901	0.26468	0.216946	0.161269	0.109483	0.0775342	0.0748626	0.0866759	0.0973903	0.102172	0.10188	0.0981802	0.0923082	0.084483	0.0742057	0.0619889	0.0504927	0.0418632	0.0367653	0.0343391	0.0340898	0.0351404	0.0355901	0.0358297
1	1	-1	1	0.140559	0.121368	0.106201	0.0912061	0.109222	0.185905	0.250067	0.273955	0.292371	0.300142	0.288911	0.262812	0.218547	0.172307	0.152973	0.178179	0.235183	0.299487	0.352806	0.389375	0.405977	0.405467	0.388156	0.349786	0.292687	0.225976	0.160855	0.116756	0.106272	0.119404	0.132932	0.137972	0.137516	0.133475	0.12624	0.118774	0.107939	0.0935438	0.0795887	0.0685222	0.0606058	0.0567307	0.0561104	0.0577876	0.0590823	0.0599522
1	1	-1	1	0.132846	0.0796794	0.0488332	0.0539741	0.0657352	0.108965	0.158773	0.180982	0.202585	0.209924	0.202764	0.184987	0.15449	0.129271	0.129849	0.15579	0.20043	0.254236	0.299866	0.329445	0.345942	0.347141	0.330282	0.294465	0.243285	0.185712	0.134781	0.111316	0.116269	0.13152	0.146279	0.154452	0.158174	0.157668	0.150965	0.138867	0.122378	0.103268	0.085005	0.0707393	0.06108	0.0554508	0.0519317	0.0501907	0.048865	0.048716
1	1	-1	1	0.0722002	0.0430312	0.0231297	0.0275335	0.0384839	0.0666139	0.107129	0.12521	0.139105	0.14364	0.137428	0.121776	0.0998292	0.0799444	0.0731197	0.0842949	0.109967	0.142897	0.17447	0.196731	0.209071	0.210454	0.200775	0.17965	0.149358	0.115039	0.0854016	0.069612	0.0714395	0.0835482	0.0947523	0.0999974	0.101077	0.0997698	0.0945616	0.0864101	0.075399	0.062866	0.0514826	0.0424899	0.0365459	0.0335691	0.0323112	0.0324781	0.0326362	0.0323945
1	1	-1	1	0.195932	0.139049	0.0897223	0.0810183	0.0959812	0.142769	0.192023	0.211805	0.229793	0.235563	0.226529	0.203583	0.170607	0.139503	0.129462	0.148837	0.189889	0.237358	0.279977	0.309991	0.325812	0.32749	0.312816	0.280834	0.235389	0.182878	0.136031	0.109952	0.110611	0.125667	0.138425	0.143819	0.144851	0.141729	0.133905	0.122441	0.106331	0.0874349	0.0700178	0.0568971	0.0500388	0.0483763	0.0480158	0.0482874	0.0488149	0.0493618
1	1	-1	1	0.0729174	0.0471263	0.0292282	0.0386641	0.050914	0.0714747	0.111173	0.133763	0.149682	0.156113	0.152339	0.138543	0.117783	0.0992048	0.0914419	0.0984332	0.119046	0.147029	0.176231	0.197348	0.207958	0.208239	0.198619	0.178199	0.148194	0.114569	0.0858855	0.0734424	0.0810766	0.100182	0.117816	0.12723	0.130365	0.127634	0.11941	0.107068	0.0910311	0.0727467	0.0553302	0.0422044	0.0344284	0.0324549	0.0340276	0.0358017	0.0362513	0.0364435
1	1	-1	1	0.0449951	0.0399883	0.038314	0.0409413	0.0551796	0.0814333	0.125881	0.146609	0.159362	0.164452	0.158956	0.143297	0.119423	0.09607	0.0878026	0.0976421	0.120087	0.15157	0.185916	0.21031	0.223232	0.225304	0.217349	0.1979	0.167495	0.13247	0.103003	0.0883415	0.0927866	0.107551	0.120365	0.127576	0.129865	0.126811	0.118746	0.107397	0.0927731	0.0756717	0.0594565	0.0473801	0.0399067	0.0365757	0.0361032	0.0368033	0.0365464	0.0366352
1	1	-1	1	0.0647293	0.0519184	0.0429437	0.0490054	0.0618623	0.0911253	0.138793	0.158429	0.172138	0.177611	0.171428	0.153466	0.126714	0.102319	0.0930256	0.105264	0.132223	0.169159	0.208429	0.234774	0.249417	0.253318	0.245661	0.223681	0.189278	0.150196	0.117561	0.103728	0.109521	0.126596	0.14162	0.149913	0.153347	0.150796	0.142329	0.129522	0.111882	0.090476	0.0708617	0.0568455	0.0478656	0.0435891	0.0416902	0.0414357	0.0411719	0.0415189
1	1	-1	1	0.0693322	0.0518423	0.0437217	0.063669	0.0780382	0.109517	0.166993	0.193199	0.21306	0.220515	0.213566	0.196412	0.170337	0.146821	0.142693	0.162906	0.200281	0.24958	0.29884	0.33195	0.34821	0.348549	0.331569	0.295676	0.245819	0.189491	0.135978	0.102792	0.097698	0.106333	0.115856	0.120948	0.122869	0.121529	0.115524	0.106418	0.0944805	0.0810398	0.0691959	0.0601814	0.053438	0.0497826	0.0486776	0.0483573	0.0478195	0.0479446
1	1	-1	1	0.114036	0.0992067	0.0924972	0.101676	0.125681	0.163781	0.213393	0.237202	0.248734	0.249083	0.233311	0.204837	0.167154	0.135157	0.124946	0.139863	0.172253	0.21295	0.256993	0.294747	0.314339	0.315679	0.303119	0.276012	0.235205	0.187584	0.145974	0.124125	0.125222	0.138367	0.151172	0.157789	0.159661	0.156311	0.146672	0.133713	0.118413	0.102047	0.0880875	0.0780548	0.0724241	0.0711496	0.0720454	0.0741534	0.0750065	0.0742678
1	1	-1	1	0.241637	0.152741	0.0876425	0.118064	0.142336	0.195492	0.26623	0.294525	0.318145	0.322211	0.30219	0.26411	0.219897	0.182061	0.166923	0.185001	0.228593	0.284024	0.33739	0.372663	0.389655	0.389476	0.373854	0.33944	0.288413	0.231176	0.18357	0.161968	0.170795	0.193625	0.211848	0.216752	0.213039	0.203135	0.187615	0.170771	0.150621	0.127529	0.108362	0.095967	0.0901777	0.0901361	0.0931014	0.0964911	0.0982126	0.0980744
1	1	-1	1	0.0879916	0.0636696	0.0539591	0.0791297	0.118692	0.17474	0.250645	0.27895	0.296887	0.296588	0.276709	0.243177	0.199364	0.1596	0.14657	0.164488	0.200509	0.248028	0.300875	0.338004	0.354261	0.353884	0.337939	0.304117	0.259176	0.214303	0.178295	0.164542	0.178511	0.205048	0.224629	0.23321	0.233974	0.225643	0.20898	0.187956	0.161807	0.134605	0.115004	0.10454	0.0991967	0.0981023	0.100375	0.103528	0.103289	0.101949
1	1	-1	1	0.0479904	0.0557978	0.0608082	0.078146	0.104271	0.134021	0.172404	0.192453	0.202991	0.20471	0.195586	0.173515	0.145724	0.128754	0.126277	0.138962	0.166534	0.200385	0.232488	0.256559	0.268735	0.267037	0.253648	0.227378	0.190393	0.151471	0.120362	0.106922	0.1106	0.123918	0.137356	0.144332	0.147007	0.145147	0.137975	0.127578	0.114075	0.0979072	0.0842766	0.0760079	0.0703226	0.0683314	0.0687017	0.0695195	0.0696984	0.0699276
1	1	-1	1	0.216059	0.147163	0.0888576	0.0832774	0.096852	0.128004	0.171723	0.189245	0.204617	0.210927	0.200924	0.179104	0.148213	0.123046	0.114998	0.128486	0.163402	0.204083	0.243096	0.273256	0.289925	0.292548	0.282763	0.259423	0.223175	0.181631	0.1459	0.129779	0.137031	0.157043	0.175381	0.184402	0.188546	0.18856	0.181306	0.167578	0.148781	0.127357	0.106913	0.0908793	0.0813882	0.0776153	0.0762093	0.0756785	0.0756316	0.0768576
1	1	-1	1	0.0948078	0.064499	0.0435158	0.0576719	0.0709689	0.102352	0.131607	0.145953	0.157407	0.158892	0.147739	0.128596	0.107419	0.0889711	0.0808642	0.0922194	0.116745	0.146389	0.174133	0.195653	0.208669	0.211571	0.204216	0.1862	0.161174	0.133369	0.11125	0.103573	0.11084	0.127269	0.142587	0.151194	0.154599	0.152608	0.143599	0.13013	0.112831	0.0939268	0.0775194	0.0639842	0.0555297	0.0530039	0.0533261	0.0539117	0.0534995	0.0534295
1	1	-1	1	0.0856564	0.0687583	0.0594235	0.0746428	0.0984955	0.123768	0.161429	0.176673	0.188427	0.189724	0.178674	0.157372	0.130143	0.108389	0.103036	0.116042	0.142618	0.176751	0.213056	0.238837	0.25415	0.260781	0.255761	0.235833	0.204355	0.16983	0.141567	0.13124	0.14189	0.162625	0.179416	0.18827	0.191351	0.187673	0.178032	0.163467	0.142652	0.118124	0.096519	0.08118	0.0723891	0.0702943	0.071162	0.0726211	0.0727776	0.0733729
1	1	-1	1	0.113295	0.0770213	0.046797	0.0355865	0.0405214	0.0722398	0.124498	0.151851	0.170284	0.178627	0.17585	0.160304	0.132741	0.105281	0.0917144	0.0980968	0.122026	0.155357	0.192809	0.219714	0.235374	0.238766	0.230397	0.209762	0.179692	0.145317	0.117068	0.107052	0.117526	0.138557	0.158131	0.16938	0.172355	0.16798	0.157455	0.141993	0.121859	0.0992353	0.0795178	0.0656391	0.0582446	0.0558301	0.0565445	0.0584895	0.0589578	0.0582309
1	1	-1	1	0.109703	0.0897928	0.0776941	0.0942987	0.116309	0.145395	0.195247	0.216912	0.230797	0.232235	0.218587	0.193835	0.161442	0.132718	0.120423	0.1274	0.152059	0.190105	0.230553	0.260106	0.27751	0.282821	0.275965	0.254498	0.221458	0.182924	0.147782	0.127592	0.128516	0.141271	0.152798	0.157994	0.15814	0.154603	0.147809	0.138641	0.127392	0.11417	0.102322	0.0939796	0.0893772	0.0878398	0.08765	0.0886495	0.0886653	0.087823
1	1	-1	1	0.123721	0.111505	0.097744	0.0932038	0.117108	0.16045	0.212673	0.231047	0.244815	0.248084	0.236574	0.211511	0.175571	0.143946	0.130556	0.136476	0.160306	0.196934	0.232705	0.256205	0.269718	0.273886	0.265211	0.241733	0.207761	0.168451	0.134636	0.118864	0.121768	0.134733	0.147423	0.153865	0.155823	0.154348	0.148237	0.139027	0.12604	0.110283	0.0964513	0.0872411	0.0830883	0.0831848	0.0849762	0.0877663	0.0892929	0.0894602
1	1	-1	1	0.116118	0.0937735	0.0751192	0.0821056	0.112344	0.149167	0.196519	0.219643	0.232527	0.232849	0.216789	0.188051	0.150785	0.119905	0.109886	0.122107	0.153747	0.195885	0.236007	0.266802	0.285506	0.290054	0.280509	0.254357	0.215942	0.173077	0.135925	0.116177	0.117814	0.132347	0.145287	0.149529	0.148109	0.143681	0.136136	0.127336	0.115143	0.100058	0.0878836	0.0807873	0.0775956	0.0773611	0.0790646	0.0810298	0.0820449	0.0819153
1	1	-1	1	0.0596224	0.0573954	0.0555781	0.0633497	0.0718325	0.098706	0.14131	0.164966	0.177466	0.180868	0.174512	0.157635	0.133069	0.109744	0.0974255	0.101812	0.120879	0.147876	0.178982	0.206779	0.223931	0.23089	0.226888	0.210555	0.18628	0.157692	0.133146	0.122625	0.12821	0.141644	0.152141	0.157483	0.159124	0.156303	0.147888	0.135395	0.118126	0.0991329	0.0839035	0.0727805	0.0667923	0.0653312	0.0660044	0.0679886	0.0692972	0.0704271
1	1	-1	1	0.172235	0.108383	0.0618648	0.0685611	0.10276	0.13159	0.187876	0.209978	0.229593	0.232886	0.2195	0.192423	0.15796	0.132878	0.12028	0.125681	0.146861	0.180776	0.223162	0.253074	0.269722	0.276303	0.271471	0.251161	0.218667	0.184661	0.158047	0.147238	0.152548	0.170788	0.189553	0.199318	0.202774	0.199776	0.190857	0.177392	0.157948	0.135417	0.115617	0.102512	0.0947888	0.0926045	0.0941161	0.0970859	0.0985164	0.0990216
1	1	-1	1	0.116512	0.104498	0.0921136	0.0951656	0.116628	0.155647	0.200411	0.227646	0.244762	0.25274	0.246411	0.224771	0.191917	0.162845	0.150455	0.160262	0.189378	0.225326	0.260932	0.291636	0.311546	0.318997	0.314356	0.294536	0.261556	0.221765	0.188884	0.176465	0.184519	0.204696	0.22332	0.231944	0.233252	0.228823	0.21839	0.203154	0.181995	0.15847	0.138276	0.123394	0.11584	0.114635	0.115225	0.116921	0.117432	0.117275
1	-1	1	-1	0.0512	0.0523	0.0505	0.0424	0.0449	0.0592	0.0895	0.108	0.12	0.131	0.139	0.142	0.138	0.138	0.147	0.164	0.18	0.202	0.259	0.439	0.707	0.987	1.22	1.38	1.46	1.68	1.37	1.22	1.01	0.753	0.466	0.203	0.0295	-0.00434	0.013	0.0272	0.0278	0.0256	0.0229	0.0191	0.0155	0.0119	0.00853	0.00624	0.00457	0.0033
1	-1	1	-1	0.0449	0.0417	0.0447	0.0473	0.0579	0.0704	0.0877	0.0991	0.106	0.11	0.112	0.113	0.11	0.11	0.12	0.143	0.163	0.184	0.233	0.382	0.62	0.875	1.09	1.24	1.32	1.33	1.26	1.12	0.936	0.706	0.446	0.203	0.0354	-0.00979	0.00594	0.0212	0.0238	0.0232	0.0218	0.0186	0.0151	0.0118	0.00904	0.007	0.00549	0.00463
1	-1	1	-1	0.0851	0.0794	0.0761	0.0699	0.0712	0.0797	0.094	0.102	0.108	0.114	0.119	0.124	0.127	0.131	0.14	0.153	0.169	0.192	0.227	0.282	0.351	0.424	0.487	0.531	0.553	0.549	0.521	0.472	0.408	0.329	0.244	0.166	0.106	0.0733	0.0566	0.0475	0.04	0.0342	0.0286	0.023	0.0188	0.0145	0.0106	0.00798	0.00565	0.00411
1	-1	1	-1	0.0695	0.0656	0.0652	0.0733	0.0806	0.112	0.155	0.172	0.183	0.188	0.184	0.174	0.155	0.139	0.145	0.174	0.209	0.245	0.31	0.442	0.639	0.841	0.998	1.1	1.13	1.09	1	0.871	0.72	0.538	0.332	0.14	0.0189	-0.0123	0.00874	0.024	0.0254	0.0246	0.0214	0.017	0.0137	0.011	0.00869	0.00716	0.00612	0.00555
1	-1	1	-1	0.0904	0.1	0.0985	0.0827	0.0824	0.0948	0.12	0.135	0.142	0.148	0.149	0.142	0.13	0.125	0.134	0.162	0.193	0.23	0.294	0.427	0.612	0.798	0.941	1.03	1.05	1.01	0.928	0.808	0.658	0.487	0.296	0.127	0.0211	0	0.0153	0.0284	0.0296	0.0278	0.0241	0.0206	0.0182	0.016	0.0137	0.0115	0.00965	0.00888
1	-1	1	-1	0.0512	0.0806	0.099	0.0877	0.0859	0.0989	0.138	0.167	0.177	0.182	0.184	0.18	0.17	0.161	0.164	0.183	0.208	0.237	0.291	0.418	0.605	0.796	0.946	1.04	1.08	1.05	0.973	0.855	0.708	0.533	0.337	0.154	0.029	-0.00199	0.0121	0.0254	0.0275	0.0253	0.0218	0.0181	0.0155	0.0131	0.0104	0.00795	0.00596	0.00506
1	-1	1	-1	0.0692	0.0722	0.0821	0.0898	0.114	0.138	0.174	0.198	0.213	0.219	0.215	0.204	0.186	0.178	0.195	0.234	0.278	0.33	0.402	0.535	0.718	0.902	1.04	1.12	1.13	1.08	0.978	0.849	0.699	0.526	0.336	0.162	0.0455	0.0126	0.0232	0.0342	0.0346	0.0318	0.0277	0.0232	0.0197	0.0166	0.0137	0.0111	0.00888	0.00756
1	-1	1	-1	0.0707	0.065	0.0635	0.0712	0.0805	0.117	0.172	0.199	0.216	0.224	0.22	0.207	0.186	0.167	0.172	0.205	0.248	0.297	0.368	0.499	0.669	0.831	0.949	1.01	1.02	0.966	0.87	0.748	0.614	0.461	0.289	0.134	0.0321	0.0111	0.0219	0.0281	0.0267	0.024	0.021	0.0174	0.0146	0.0121	0.00967	0.00799	0.00667	0.00583
1	-1	1	-1	0.0593	0.0591	0.0751	0.0836	0.107	0.154	0.226	0.258	0.278	0.283	0.277	0.26	0.229	0.21	0.22	0.264	0.325	0.392	0.477	0.636	0.847	1.05	1.19	1.27	1.27	1.21	1.08	0.937	0.768	0.578	0.371	0.173	0.0387	0.0141	0.0296	0.0388	0.0378	0.0348	0.03	0.0255	0.0219	0.0183	0.0149	0.0121	0.00966	0.00795
1	-1	1	-1	0.103	0.107	0.11	0.12	0.124	0.156	0.248	0.292	0.316	0.324	0.318	0.3	0.272	0.243	0.237	0.261	0.301	0.363	0.449	0.545	0.645	0.73	0.777	0.78	0.744	0.673	0.577	0.477	0.389	0.301	0.204	0.119	0.0623	0.0424	0.0418	0.0441	0.0412	0.0365	0.032	0.0275	0.0237	0.0209	0.0183	0.0158	0.0137	0.0128
1	-1	1	-1	0.149	0.14	0.139	0.147	0.16	0.193	0.257	0.287	0.302	0.307	0.297	0.277	0.246	0.22	0.225	0.269	0.332	0.406	0.497	0.603	0.713	0.806	0.858	0.863	0.82	0.735	0.622	0.509	0.409	0.311	0.21	0.118	0.0552	0.0343	0.0353	0.0382	0.0354	0.0311	0.0272	0.0232	0.02	0.0173	0.0144	0.0124	0.0111	0.0107
1	-1	1	-1	0.133	0.109	0.0901	0.089	0.117	0.168	0.231	0.268	0.291	0.298	0.29	0.269	0.238	0.215	0.223	0.267	0.322	0.386	0.466	0.577	0.697	0.793	0.847	0.854	0.814	0.735	0.63	0.522	0.42	0.316	0.202	0.104	0.0435	0.031	0.0336	0.0352	0.033	0.0298	0.0261	0.0223	0.0191	0.0164	0.0143	0.0128	0.0118	0.0112
1	-1	1	-1	0.0933	0.0978	0.101	0.118	0.158	0.204	0.281	0.318	0.341	0.349	0.338	0.307	0.266	0.241	0.255	0.308	0.381	0.459	0.547	0.635	0.712	0.763	0.775	0.742	0.667	0.561	0.445	0.349	0.278	0.218	0.155	0.0943	0.0556	0.0444	0.0442	0.0447	0.0411	0.0358	0.0309	0.0265	0.0234	0.0205	0.0182	0.0168	0.0154	0.0143
1	-1	1	-1	0.074	0.104	0.13	0.139	0.169	0.202	0.316	0.369	0.395	0.403	0.393	0.366	0.322	0.288	0.289	0.32	0.365	0.425	0.517	0.601	0.674	0.726	0.741	0.714	0.653	0.564	0.461	0.375	0.309	0.246	0.178	0.115	0.0703	0.0522	0.0478	0.0448	0.0381	0.0314	0.0265	0.0217	0.0178	0.0157	0.0141	0.0129	0.0119	0.0116
1	-1	1	-1	0.0784	0.0956	0.112	0.108	0.128	0.175	0.246	0.286	0.308	0.317	0.315	0.297	0.263	0.235	0.236	0.278	0.344	0.418	0.501	0.594	0.679	0.739	0.76	0.74	0.679	0.586	0.476	0.372	0.291	0.224	0.154	0.0887	0.0476	0.0363	0.0358	0.0354	0.0322	0.0279	0.024	0.0204	0.0176	0.0153	0.0132	0.0115	0.0104	0.0101
1	-1	1	1	0.0150012	0.0253813	0.0384211	0.0420752	0.0450389	0.0554217	0.0676391	0.0785058	0.0828777	0.0836761	0.0813956	0.0784146	0.0733705	0.0695872	0.0728333	0.0847416	0.102974	0.126621	0.156272	0.200031	0.253207	0.302038	0.338359	0.358523	0.361406	0.348993	0.324963	0.295091	0.262593	0.22576	0.18429	0.144902	0.115505	0.100612	0.0924453	0.0827956	0.0705508	0.057253	0.0444447	0.0334299	0.0258102	0.0213194	0.0184793	0.0163365	0.0150416	0.0151401
1	-1	1	1	0.0455951	0.0446143	0.038643	0.0318025	0.0296438	0.040048	0.0521636	0.0630259	0.0686036	0.0738364	0.0757929	0.0750265	0.0720939	0.0694751	0.0749885	0.0888131	0.108903	0.135337	0.166772	0.212867	0.26936	0.322752	0.36168	0.382974	0.38583	0.371498	0.345327	0.314855	0.282398	0.244288	0.201582	0.161988	0.13255	0.118506	0.110648	0.101207	0.0868542	0.070086	0.0540948	0.0404784	0.0318198	0.027381	0.0239106	0.0215956	0.0203817	0.0205909
1	-1	1	1	0.0033125	0.0179022	0.032269	0.0366279	0.0417446	0.0539005	0.0653367	0.0738954	0.0787512	0.0809036	0.0806899	0.0779987	0.0728559	0.0690277	0.0723588	0.082951	0.100025	0.123814	0.155827	0.204157	0.260956	0.313898	0.354651	0.377399	0.38063	0.366778	0.340512	0.308512	0.272416	0.231172	0.188217	0.149183	0.121847	0.109282	0.100963	0.0910068	0.078124	0.0627722	0.0478178	0.0352566	0.026856	0.0222232	0.0189239	0.0173789	0.0167042	0.0166465
1	-1	1	1	0.0382879	0.0341887	0.0351333	0.0416919	0.04549	0.0460093	0.0610555	0.0717329	0.0780202	0.0802025	0.079395	0.0767548	0.0717552	0.0685549	0.0735045	0.0834786	0.0962955	0.114977	0.142323	0.179619	0.225642	0.271393	0.307292	0.328595	0.33442	0.326651	0.311519	0.296908	0.281161	0.257859	0.228804	0.198165	0.171186	0.154476	0.143164	0.128909	0.109604	0.0875255	0.0660499	0.0486454	0.0382279	0.0333381	0.0295657	0.0267252	0.0251854	0.0248652
1	-1	1	1	0.0211468	0.0268676	0.0341469	0.039583	0.0431798	0.0507973	0.0598801	0.0672643	0.0721565	0.0746643	0.0746256	0.0733609	0.0712151	0.0710636	0.0783516	0.0927725	0.112361	0.137194	0.16785	0.20597	0.247779	0.285973	0.313883	0.326072	0.322414	0.308958	0.290447	0.271686	0.254775	0.235205	0.213025	0.191818	0.174205	0.161734	0.149399	0.134269	0.114104	0.0898961	0.0666858	0.0492864	0.0379132	0.0317706	0.0283538	0.0268878	0.0264692	0.0269814
1	-1	1	1	0.02884	0.0325514	0.0362963	0.030948	0.0247722	0.0266888	0.0380396	0.0444337	0.0478112	0.0516155	0.054762	0.0564686	0.0543914	0.0520398	0.0540487	0.0611504	0.0738094	0.0901017	0.111661	0.139684	0.173009	0.205278	0.230929	0.245411	0.248246	0.242197	0.230147	0.216734	0.202615	0.185321	0.16519	0.142618	0.123479	0.111735	0.102971	0.0918288	0.0764938	0.0589477	0.0434577	0.0323611	0.0251713	0.0210336	0.0185253	0.017121	0.0159878	0.0157232
1	-1	1	1	0.0117961	0.017126	0.0250682	0.0287739	0.0361884	0.0517278	0.0688208	0.0778505	0.0820605	0.0828506	0.0810426	0.0764666	0.0695377	0.0655087	0.0677483	0.0784722	0.0993523	0.128559	0.170975	0.23715	0.323033	0.410016	0.47973	0.524385	0.53936	0.524527	0.485075	0.426905	0.354972	0.273824	0.189196	0.112571	0.059096	0.0363033	0.0331807	0.0340285	0.0313931	0.0271455	0.0220927	0.0170881	0.0135841	0.0112729	0.00932901	0.00748323	0.00590187	0.00541895
1	-1	1	1	0.0126737	0.0207324	0.0308144	0.0337441	0.0389482	0.0553256	0.0669053	0.0759899	0.08027	0.0822445	0.0826923	0.080059	0.0753631	0.0730417	0.0783672	0.0931989	0.116251	0.145705	0.187896	0.267655	0.377899	0.489197	0.577626	0.63468	0.655833	0.6408	0.595514	0.525975	0.438566	0.336875	0.228889	0.131125	0.0641073	0.0413488	0.0414193	0.0419551	0.036638	0.0296623	0.0230206	0.0170431	0.0127232	0.00976923	0.00770211	0.00636103	0.00578889	0.00608267
1	-1	1	1	0.00869865	0.015124	0.0244357	0.0261733	0.0277873	0.0343605	0.0466225	0.0545639	0.0581748	0.0600956	0.0603012	0.0594621	0.0580255	0.0588187	0.0642347	0.0755296	0.0919558	0.115105	0.152441	0.220324	0.312072	0.40401	0.478258	0.526951	0.546	0.535129	0.49909	0.441651	0.36696	0.280127	0.188342	0.10588	0.0492128	0.0291807	0.028738	0.0288892	0.0256991	0.0218757	0.0179469	0.0136584	0.0107053	0.00851837	0.00679486	0.00576419	0.00529599	0.00534291
1	-1	1	1	0.0292673	0.0239567	0.0231768	0.0337866	0.0326178	0.0388212	0.0458141	0.0521569	0.057642	0.0593054	0.0587464	0.0611198	0.0639668	0.063135	0.0649631	0.0753316	0.0914379	0.105734	0.127553	0.182915	0.25687	0.327643	0.384215	0.422555	0.443389	0.445268	0.425992	0.391559	0.347923	0.295119	0.231598	0.166958	0.124498	0.11319	0.103956	0.0898731	0.0748766	0.0604666	0.0476076	0.0366044	0.029414	0.0259921	0.0230555	0.0201707	0.0183019	0.0186085
1	-1	1	1	0.0173695	0.0288564	0.0430607	0.0534256	0.0545867	0.0571933	0.0626852	0.0648877	0.0644161	0.0620329	0.0588486	0.055933	0.0532965	0.050876	0.0535106	0.0617392	0.073304	0.0923989	0.122668	0.168415	0.228807	0.291137	0.341111	0.372942	0.385753	0.382618	0.365294	0.336549	0.298624	0.251066	0.19828	0.150446	0.114417	0.0952632	0.0868187	0.0771273	0.0621836	0.0460795	0.0329262	0.0244969	0.0194303	0.0166281	0.0147989	0.0135257	0.012712	0.0129407
1	-1	1	1	0.0243967	0.0271073	0.033351	0.0409313	0.0437354	0.0475139	0.0590649	0.0645118	0.068299	0.0694701	0.0686712	0.0670924	0.0628243	0.0594512	0.0623571	0.0712514	0.0843345	0.105341	0.138208	0.186066	0.248645	0.312198	0.364976	0.399552	0.414029	0.409584	0.388296	0.356223	0.316852	0.268435	0.214227	0.16428	0.12661	0.106388	0.0971513	0.0863627	0.0722173	0.0569993	0.0432252	0.0328899	0.0259319	0.0216577	0.0190295	0.017439	0.0166434	0.0171833
1	-1	1	1	0.0242417	0.0336194	0.0412694	0.0483925	0.0471541	0.0510588	0.0649597	0.0713998	0.0761018	0.0802435	0.0809066	0.0815497	0.0823263	0.0824003	0.085718	0.0936297	0.108817	0.134544	0.174159	0.241627	0.335546	0.436269	0.523394	0.58289	0.610265	0.605954	0.571347	0.511199	0.431789	0.337176	0.237945	0.146107	0.0767371	0.0458482	0.0388973	0.0368027	0.0326301	0.026613	0.0206729	0.0156075	0.0119909	0.00966478	0.00775697	0.00627592	0.00508388	0.00444102
1	-1	1	1	0.0210651	0.0396484	0.060118	0.0603813	0.0603441	0.0627471	0.0747564	0.0805415	0.0822325	0.0830171	0.0838365	0.0855482	0.0840122	0.0825709	0.0893532	0.103402	0.118496	0.13931	0.184894	0.26748	0.379274	0.496515	0.593185	0.657222	0.686241	0.679658	0.638903	0.570484	0.480612	0.371629	0.251625	0.143356	0.0734263	0.0461591	0.040915	0.0397127	0.0333762	0.0255287	0.0200183	0.0159325	0.0129846	0.0105553	0.00815989	0.00618473	0.00492551	0.00427473
1	-1	1	1	0.0334674	0.0510739	0.0640493	0.0584486	0.0548693	0.0550313	0.0660741	0.074994	0.0777191	0.0797856	0.0830979	0.0876641	0.0894734	0.0899102	0.0945343	0.1047	0.122728	0.153518	0.201505	0.279145	0.388031	0.502774	0.595453	0.655616	0.68235	0.674228	0.631147	0.559503	0.467767	0.36193	0.253213	0.154915	0.0829223	0.0515926	0.0483995	0.0480496	0.0409178	0.0318116	0.0243125	0.0187573	0.0147702	0.0120176	0.00991201	0.00822804	0.00692222	0.00660081
1	-1	1	1	0.0125754	0.0102928	0.00935394	0.0149159	0.0219842	0.0328234	0.0432329	0.0488736	0.0541142	0.0580538	0.0587114	0.0564905	0.052488	0.0495979	0.0526636	0.062906	0.0781967	0.101615	0.139751	0.208941	0.303438	0.40033	0.480899	0.534049	0.554196	0.542986	0.505576	0.448296	0.376568	0.293267	0.20276	0.121548	0.0675907	0.048479	0.0472172	0.0463104	0.0401222	0.0310845	0.0213421	0.0137714	0.00956222	0.00803867	0.00777927	0.00782695	0.00741929	0.00726963
1	-1	1	1	0.0245903	0.0203371	0.0148289	0.0191692	0.0178277	0.0233376	0.0338917	0.0408143	0.0473563	0.052765	0.0534616	0.0523619	0.0517712	0.0493451	0.0513125	0.0634663	0.0802869	0.0997902	0.138222	0.206028	0.296741	0.393437	0.473445	0.523192	0.54123	0.530876	0.494333	0.436975	0.368141	0.289293	0.201025	0.120069	0.0691704	0.0497624	0.0488917	0.0504285	0.0444186	0.0344619	0.0251255	0.0176973	0.012319	0.0100635	0.00938333	0.00870967	0.00841006	0.00900327
1	-1	1	1	0.0407004	0.0295826	0.0217629	0.0212995	0.0223817	0.0292622	0.0404036	0.0466248	0.0525712	0.0570509	0.0585796	0.0574366	0.0541489	0.0505979	0.0514455	0.059385	0.074638	0.096647	0.132	0.199039	0.293204	0.393849	0.479798	0.538031	0.563429	0.557518	0.52402	0.467904	0.396391	0.313202	0.22316	0.138778	0.079413	0.0574946	0.055919	0.0562643	0.0506434	0.0411902	0.031149	0.0229674	0.0170889	0.0135456	0.0119309	0.0111539	0.0102695	0.010132
1	-1	1	1	0.0371783	0.0284456	0.0279833	0.0385535	0.0470896	0.0535707	0.0623172	0.066409	0.0727986	0.0764772	0.0767029	0.0772007	0.0777188	0.0787143	0.086815	0.103679	0.124332	0.150482	0.194883	0.269624	0.370725	0.480672	0.574192	0.636304	0.663205	0.658185	0.62484	0.568274	0.493805	0.403836	0.304217	0.211186	0.145332	0.114493	0.104012	0.0971304	0.0828721	0.0648586	0.0483389	0.0361183	0.0286285	0.024336	0.0207328	0.0180958	0.0166871	0.0168618
1	-1	1	1	0.0272741	0.0462012	0.060088	0.0631335	0.0657881	0.0682977	0.0823632	0.0879796	0.0899834	0.0922176	0.0925729	0.0918444	0.0911055	0.0933025	0.0997162	0.10975	0.125122	0.153013	0.201164	0.277409	0.378156	0.48588	0.576941	0.637805	0.664826	0.661285	0.630904	0.578262	0.504695	0.414293	0.318552	0.231015	0.166365	0.135357	0.123049	0.113067	0.0964689	0.0753515	0.0559095	0.0421041	0.0334964	0.0289771	0.0265976	0.0250253	0.0240113	0.0242472
1	-1	1	1	0.0251581	0.041963	0.0528611	0.0571878	0.0555709	0.0580084	0.0670426	0.0723009	0.0755334	0.0784897	0.0789798	0.0789203	0.0794299	0.0814268	0.0887739	0.105056	0.125097	0.145237	0.178856	0.244617	0.333046	0.425227	0.50187	0.552055	0.57438	0.571392	0.545505	0.501382	0.44284	0.370645	0.286426	0.202927	0.144155	0.120217	0.109412	0.098449	0.0829973	0.0656835	0.0501518	0.0385096	0.0306535	0.0259671	0.0228761	0.0209491	0.0196678	0.0192185
1	-1	1	1	0.00988348	0.0217349	0.030589	0.0257501	0.0291881	0.0520593	0.0722623	0.0861774	0.0921946	0.0950355	0.0942536	0.087957	0.0754782	0.0652111	0.0678165	0.0852229	0.111721	0.143038	0.179967	0.228382	0.280905	0.32499	0.351648	0.358865	0.345788	0.314845	0.272862	0.229753	0.18925	0.14787	0.104231	0.0665944	0.0423347	0.033065	0.0314176	0.0295185	0.0248042	0.0194005	0.0144447	0.0107135	0.00839305	0.00690439	0.00560867	0.00469069	0.00406505	0.00378798
1	-1	1	1	0.0150289	0.0195365	0.0267536	0.027915	0.0350723	0.0544028	0.0777092	0.0938058	0.101598	0.103978	0.102429	0.0953246	0.0829494	0.0746008	0.0784368	0.0969328	0.124908	0.15641	0.195151	0.246184	0.303037	0.350281	0.378357	0.385862	0.372049	0.339355	0.295859	0.250653	0.207225	0.163456	0.117146	0.0751267	0.0481282	0.038991	0.0375155	0.0348005	0.0293589	0.0234318	0.0177956	0.0133694	0.0106187	0.00857788	0.00681681	0.00553068	0.0048594	0.00496071
1	-1	1	1	0.0125948	0.0183475	0.0240689	0.0243743	0.0305795	0.0447713	0.0703245	0.084404	0.0909744	0.0929541	0.0902931	0.0829551	0.0716205	0.0617314	0.0657494	0.0836616	0.108456	0.13896	0.176853	0.222759	0.271397	0.311365	0.335379	0.33987	0.324922	0.294201	0.253753	0.212056	0.175625	0.138534	0.0982858	0.0623549	0.0378757	0.0291031	0.0275007	0.0256931	0.0220057	0.0169607	0.0124808	0.00929135	0.00732942	0.00616341	0.00489335	0.0040113	0.00347972	0.00320441
1	-1	1	1	0.0184394	0.0323476	0.0420094	0.0495179	0.0505724	0.0635166	0.0868913	0.0994135	0.105063	0.108341	0.106524	0.100603	0.0936087	0.0910188	0.0947412	0.107012	0.128028	0.15419	0.18371	0.21642	0.254095	0.285975	0.305444	0.310649	0.301465	0.280994	0.257715	0.238843	0.219893	0.199248	0.176528	0.151687	0.129958	0.116773	0.109485	0.0981704	0.0823225	0.065417	0.0491804	0.035831	0.0279461	0.0243451	0.0216885	0.0197722	0.0187883	0.0186951
1	-1	1	1	0.0622739	0.069716	0.078706	0.0669096	0.0629254	0.0777872	0.105156	0.119741	0.127765	0.131414	0.132159	0.127902	0.117082	0.105342	0.104129	0.116085	0.138244	0.168225	0.204152	0.242875	0.282417	0.317271	0.340065	0.344971	0.331943	0.30721	0.277613	0.250327	0.22817	0.205944	0.182026	0.157375	0.136602	0.123033	0.112283	0.100878	0.0855543	0.0665207	0.0483915	0.0352348	0.026987	0.0224975	0.0197186	0.0178369	0.0167032	0.0170896
1	-1	1	1	0.0366732	0.0525309	0.0673319	0.072451	0.0736626	0.0860725	0.109845	0.125171	0.132097	0.132773	0.129892	0.12322	0.113329	0.104316	0.103879	0.116904	0.139837	0.169441	0.205424	0.245206	0.284948	0.318114	0.336405	0.336613	0.32273	0.299384	0.270771	0.244263	0.22413	0.205863	0.184664	0.162599	0.143915	0.130821	0.118895	0.104728	0.0863391	0.0658616	0.0485259	0.0358188	0.0275969	0.0235859	0.0211222	0.0196929	0.0191151	0.0193904
1	-1	1	1	0.0285029	0.0351377	0.0408877	0.0385296	0.041394	0.0497231	0.071872	0.0841258	0.0906978	0.0951782	0.0970723	0.0953996	0.0892824	0.0842053	0.0881466	0.0996901	0.114266	0.135221	0.167304	0.211428	0.268149	0.321679	0.360848	0.381902	0.384675	0.370521	0.344141	0.312688	0.278128	0.236094	0.187714	0.142719	0.11005	0.0949985	0.0895324	0.0800104	0.0660809	0.0510942	0.0382286	0.0284612	0.0221867	0.0188153	0.0160724	0.0141962	0.0132077	0.0132409
1	-1	1	1	0.0564244	0.0492644	0.0442979	0.0386228	0.0360369	0.0445236	0.060549	0.0714407	0.0782714	0.081798	0.0828101	0.0822877	0.0783767	0.0730413	0.0763145	0.0905861	0.111709	0.138329	0.172939	0.219597	0.276515	0.331376	0.371962	0.393935	0.398015	0.386527	0.360637	0.327601	0.292837	0.253112	0.208223	0.164194	0.130409	0.112338	0.10172	0.090263	0.0748721	0.0583687	0.0444289	0.0342475	0.0266987	0.0222766	0.0198178	0.0184709	0.0178988	0.0183654
1	-1	1	1	0.0309103	0.0468828	0.061797	0.0626963	0.0595959	0.0633195	0.0725251	0.0789367	0.0814904	0.0814255	0.0801487	0.0781013	0.0738277	0.0723783	0.0786311	0.0927975	0.11344	0.138116	0.170558	0.220216	0.280568	0.338205	0.381798	0.404356	0.405622	0.389602	0.360606	0.325395	0.285318	0.23884	0.188921	0.141705	0.107382	0.0933206	0.0860343	0.0773001	0.0659508	0.0520303	0.0386606	0.0292255	0.0234149	0.0199331	0.0174699	0.0158671	0.0149794	0.0149071
1	-1	1	1	0.0324827	0.0352871	0.037362	0.0449168	0.0510171	0.0650491	0.0851042	0.0936789	0.10146	0.10651	0.106453	0.102492	0.0947123	0.087031	0.0917138	0.111777	0.137835	0.168354	0.215499	0.292458	0.396689	0.503397	0.588166	0.638187	0.651177	0.62898	0.575884	0.503481	0.419828	0.324387	0.219715	0.123193	0.057889	0.0342608	0.0346847	0.0355462	0.0308917	0.0238511	0.0176631	0.0131458	0.00978131	0.00745176	0.0057006	0.00478715	0.00420131	0.00375916
1	-1	1	1	0.0158649	0.027042	0.0407465	0.0465619	0.0478134	0.060458	0.0830138	0.0932106	0.0992353	0.102441	0.103377	0.100404	0.0922195	0.085807	0.0905649	0.106769	0.13083	0.163104	0.211022	0.287542	0.384423	0.479751	0.554339	0.597833	0.606997	0.583001	0.532244	0.465275	0.387853	0.298179	0.202718	0.116719	0.0587923	0.0392367	0.0368385	0.0354793	0.0302333	0.0229821	0.0169288	0.0127068	0.00994368	0.0081623	0.00658564	0.00520597	0.00395776	0.0031509
1	-1	1	1	0.036991	0.0294866	0.0295565	0.0402571	0.0467605	0.058027	0.0735609	0.0860616	0.0948406	0.099488	0.099478	0.0977482	0.0927725	0.0906661	0.100131	0.119494	0.145929	0.176274	0.217423	0.28805	0.380376	0.471834	0.541305	0.579836	0.586371	0.563501	0.515267	0.451433	0.377145	0.290646	0.199021	0.114047	0.0551325	0.0347022	0.0334705	0.0334628	0.028294	0.021433	0.0166237	0.0137144	0.0118203	0.00994919	0.00772227	0.00575334	0.00416289	0.00341348
1	-1	1	1	0.0230344	0.0277782	0.0361889	0.0508514	0.0513604	0.0490362	0.0598411	0.0687973	0.0757934	0.0807156	0.0807631	0.0773657	0.0723085	0.070421	0.0731184	0.0831847	0.10178	0.133673	0.185943	0.271137	0.374491	0.472496	0.547647	0.589821	0.59544	0.568546	0.517639	0.449466	0.370141	0.284005	0.196542	0.121814	0.0758006	0.0632582	0.0599328	0.0539998	0.0443452	0.0326268	0.0219131	0.0149119	0.0118035	0.0105496	0.00995346	0.0099546	0.00963739	0.00937104
1	-1	1	1	0.0417832	0.0291186	0.0165215	0.0157191	0.0206134	0.028548	0.0492294	0.0638269	0.0744606	0.0831274	0.0847885	0.0814648	0.0744054	0.0703198	0.0733352	0.0845948	0.104599	0.129198	0.172973	0.243518	0.33744	0.432194	0.506293	0.550679	0.561295	0.541899	0.497829	0.438298	0.367316	0.287323	0.202045	0.122193	0.0702184	0.0504219	0.0508993	0.0505587	0.0435124	0.0338986	0.0243096	0.0168599	0.0120624	0.0100669	0.00849122	0.00765388	0.00721864	0.00719641
1	-1	1	1	0.0233484	0.0231868	0.0185989	0.0191896	0.0259661	0.0432258	0.067726	0.0799239	0.0882129	0.0947875	0.0949568	0.089882	0.0821733	0.0749103	0.0749274	0.0894814	0.114891	0.14485	0.189559	0.268033	0.368078	0.465009	0.539124	0.58255	0.592969	0.570983	0.523091	0.457591	0.383238	0.302593	0.214662	0.130562	0.0777384	0.0645048	0.0643109	0.0618222	0.0527378	0.0419252	0.0313127	0.021169	0.0141577	0.0109551	0.0098043	0.008921	0.00790857	0.00749797
1	-1	1	1	0.0297036	0.0480817	0.0611961	0.0521898	0.0511216	0.0587734	0.0839362	0.094883	0.100792	0.104633	0.106862	0.106866	0.102228	0.0964208	0.0971077	0.107309	0.123927	0.149503	0.194507	0.261362	0.34508	0.429641	0.497104	0.537428	0.551237	0.540334	0.5059	0.453838	0.390999	0.319237	0.240822	0.16828	0.118356	0.0963727	0.0879413	0.0797007	0.0669533	0.0521159	0.039879	0.0303288	0.0235992	0.0193918	0.0166237	0.0153104	0.0143462	0.0136413
1	-1	1	1	0.024968	0.0327691	0.0371163	0.0393376	0.0395259	0.052112	0.0678196	0.0736639	0.0781006	0.0816226	0.082793	0.081254	0.0771281	0.0748459	0.0796152	0.0924397	0.113122	0.140629	0.177371	0.23454	0.310322	0.387943	0.450435	0.489049	0.502702	0.491855	0.460661	0.416303	0.362029	0.296981	0.225719	0.158648	0.110058	0.0886064	0.0819611	0.0750897	0.0633283	0.0497317	0.0380509	0.0289291	0.0229938	0.0192042	0.0162554	0.014074	0.0124019	0.0117635
1	-1	1	1	0.0552252	0.0660805	0.0837713	0.090293	0.0914026	0.104531	0.123243	0.132917	0.139533	0.141328	0.141592	0.14033	0.134343	0.127611	0.129046	0.144578	0.170686	0.204863	0.2545	0.334991	0.440511	0.547636	0.635461	0.69012	0.709002	0.696211	0.654389	0.591151	0.51521	0.427684	0.330132	0.238039	0.171035	0.140535	0.128619	0.116159	0.0982294	0.0769903	0.0585147	0.0451359	0.0359267	0.029874	0.0252785	0.02227	0.0208033	0.0214485
1	-1	1	1	0.0945464	0.0890559	0.0739411	0.0721134	0.0794959	0.106746	0.138599	0.158049	0.169597	0.17773	0.17199	0.154965	0.134575	0.122553	0.126173	0.152667	0.199364	0.255501	0.311024	0.367571	0.421023	0.459256	0.473642	0.460162	0.420288	0.361707	0.298599	0.243412	0.200798	0.16859	0.138305	0.108197	0.0862356	0.0754003	0.0696482	0.0631143	0.0524304	0.0401095	0.0288977	0.0200086	0.0149647	0.0133302	0.0130218	0.0133309	0.0135614	0.0139671
1	-1	1	1	0.0344902	0.0322488	0.0309475	0.0384519	0.0452446	0.0709526	0.11274	0.137198	0.154417	0.164139	0.163919	0.154027	0.135928	0.119357	0.120048	0.149064	0.198851	0.255404	0.309333	0.364549	0.411684	0.442277	0.450947	0.433281	0.391071	0.330939	0.26282	0.202995	0.165854	0.144585	0.120493	0.0925736	0.0735026	0.0670286	0.0622164	0.0560558	0.0473407	0.0372416	0.0281084	0.020718	0.0156441	0.0128038	0.0112427	0.0102685	0.00937924	0.00895926
1	-1	1	1	0.0826718	0.0646365	0.0485591	0.0418812	0.047354	0.0700701	0.127791	0.155721	0.174031	0.184437	0.18303	0.16796	0.143653	0.125336	0.124675	0.144119	0.180771	0.234892	0.295165	0.353503	0.405837	0.442545	0.45628	0.442671	0.402895	0.343293	0.277662	0.22117	0.178742	0.144398	0.110905	0.0795424	0.0569352	0.0486469	0.0465178	0.0430739	0.0359226	0.0277433	0.0212217	0.0158165	0.012192	0.0107156	0.0102897	0.00989122	0.00919917	0.00900718
1	-1	1	1	0.0382581	0.0406695	0.0409243	0.0428163	0.0508107	0.0736747	0.111821	0.134247	0.147227	0.153735	0.152205	0.141065	0.121743	0.106978	0.108227	0.127855	0.159176	0.197374	0.240793	0.284373	0.321387	0.34652	0.354747	0.342964	0.312909	0.268425	0.221028	0.184437	0.160929	0.142532	0.122437	0.102278	0.087466	0.0789115	0.0721193	0.0646143	0.0540751	0.0413453	0.0296388	0.0208965	0.0157444	0.0129661	0.011599	0.0113179	0.0111975	0.0113717
1	-1	1	1	0.0648865	0.0462964	0.0340298	0.0356244	0.0448303	0.0688887	0.109112	0.128949	0.144179	0.150997	0.147244	0.134462	0.115079	0.0972203	0.0943605	0.10849	0.136962	0.177792	0.222682	0.266557	0.306553	0.33665	0.350172	0.34253	0.315005	0.272828	0.226406	0.186479	0.158555	0.13648	0.115504	0.094672	0.0791669	0.071528	0.0663162	0.0600154	0.0505365	0.0393373	0.0285824	0.0200584	0.0147928	0.0121706	0.0108794	0.0103496	0.0099394	0.0102404
1	-1	1	1	0.0456662	0.0293006	0.0192312	0.0216542	0.0315589	0.053834	0.0894702	0.105009	0.116958	0.120775	0.117753	0.107065	0.0878432	0.0720308	0.0713194	0.0864312	0.119242	0.161024	0.204059	0.246589	0.281422	0.306181	0.316887	0.307789	0.281039	0.24139	0.19491	0.156175	0.132959	0.116184	0.100423	0.0833511	0.0699864	0.0641004	0.0594072	0.0542539	0.0464327	0.0357428	0.0262689	0.0192205	0.0143068	0.0125017	0.0116505	0.0106306	0.00994774	0.0098406
1	-1	1	1	0.0494806	0.0454536	0.0452531	0.045585	0.0470054	0.0626595	0.085581	0.0959611	0.102458	0.104658	0.101554	0.0956195	0.0844022	0.0722195	0.0728895	0.0893108	0.115094	0.145584	0.178807	0.214722	0.249199	0.275903	0.290016	0.288771	0.273253	0.247014	0.215368	0.188359	0.17158	0.156789	0.138141	0.117617	0.102011	0.0935785	0.0855108	0.0751793	0.0622749	0.0479331	0.0349849	0.0251552	0.019695	0.0173795	0.0152388	0.0139319	0.0131421	0.012549
1	-1	1	1	0.0734241	0.0769879	0.0712441	0.0609939	0.0647581	0.0849393	0.114876	0.132099	0.141932	0.148722	0.14556	0.136755	0.122602	0.110234	0.117497	0.141867	0.172863	0.207662	0.245637	0.286864	0.329121	0.361372	0.375014	0.36845	0.344502	0.309012	0.268321	0.235432	0.214474	0.192422	0.164889	0.136662	0.115746	0.106082	0.0991569	0.0886795	0.0750668	0.0597432	0.045344	0.0339152	0.0260854	0.0219369	0.0191281	0.0174615	0.01648	0.0167906
1	-1	1	1	0.0502372	0.0502542	0.052319	0.051612	0.0551604	0.0761753	0.112612	0.132023	0.142321	0.147308	0.146465	0.139617	0.126649	0.113078	0.110291	0.1224	0.145231	0.175286	0.210833	0.246713	0.280736	0.305855	0.316383	0.312695	0.294983	0.265617	0.232162	0.203845	0.184243	0.168186	0.149548	0.129472	0.112709	0.102445	0.0945834	0.0837063	0.0693624	0.053934	0.0396905	0.0282771	0.0208893	0.0171955	0.0152981	0.0144163	0.0135967	0.0137122
1	-1	1	1	0.100646	0.0644019	0.0426382	0.0473942	0.0583911	0.0850328	0.123178	0.147393	0.166178	0.175436	0.173285	0.161464	0.142565	0.126786	0.131056	0.155667	0.192442	0.238577	0.296166	0.374716	0.463915	0.541793	0.592221	0.608346	0.588566	0.537447	0.46768	0.393954	0.32487	0.253693	0.178006	0.109046	0.0649852	0.0515266	0.0494348	0.0467275	0.0399174	0.0312113	0.0230019	0.0159342	0.0111022	0.00857385	0.00754628	0.0074418	0.00714724	0.00655445
1	-1	1	1	0.0333228	0.039196	0.0513523	0.0667246	0.0562477	0.0815307	0.140024	0.166753	0.187085	0.199892	0.200746	0.19048	0.171296	0.157114	0.153906	0.167502	0.196872	0.242325	0.3027	0.384981	0.474995	0.554475	0.605541	0.620255	0.598657	0.545395	0.474137	0.401692	0.328412	0.25183	0.172066	0.100726	0.0592785	0.0517662	0.0510004	0.047401	0.0405934	0.0329537	0.026721	0.0204399	0.0150279	0.0113577	0.00963126	0.00863785	0.00761596	0.00731738
1	-1	1	1	0.0527152	0.0379618	0.0308564	0.0392281	0.0501716	0.073878	0.101731	0.120189	0.134503	0.141251	0.138527	0.12553	0.107727	0.099075	0.110187	0.141473	0.185347	0.231788	0.281806	0.351271	0.431783	0.50463	0.552382	0.566308	0.544314	0.492435	0.427019	0.362136	0.302186	0.241199	0.173666	0.107786	0.0633558	0.0491431	0.0489797	0.0490211	0.0433791	0.0347451	0.0253639	0.0171551	0.011989	0.0089554	0.00756947	0.00729531	0.00691576	0.00663899
1	-1	1	1	0.048448	0.0519897	0.0454496	0.0352041	0.0312652	0.0440982	0.0834871	0.106562	0.11921	0.128999	0.130563	0.124282	0.112223	0.0994704	0.0967807	0.109759	0.135569	0.173435	0.217748	0.266629	0.315068	0.354173	0.376305	0.377245	0.3579	0.322651	0.278048	0.233717	0.197721	0.166634	0.132524	0.0987819	0.0747262	0.0634551	0.05716	0.0507717	0.041728	0.0313611	0.0221196	0.014852	0.0102712	0.00782575	0.00623749	0.00534387	0.00459221	0.00455636
1	-1	1	1	0.0694046	0.0456804	0.0289122	0.0300206	0.041809	0.0639957	0.103337	0.125285	0.142533	0.151076	0.149449	0.138271	0.119955	0.106517	0.108692	0.125163	0.154392	0.194151	0.243737	0.296923	0.349917	0.396439	0.424554	0.428329	0.408146	0.368279	0.319504	0.274422	0.236887	0.19991	0.160782	0.124253	0.0969753	0.0813579	0.0730742	0.0660905	0.0553174	0.0423258	0.0301376	0.0204217	0.0143373	0.0118302	0.0107853	0.0100973	0.0092867	0.00928545
1	-1	1	1	0.0812438	0.0403724	0.013407	0.013834	0.0171639	0.0344952	0.065592	0.0831495	0.0980602	0.105671	0.106703	0.101013	0.0891175	0.077749	0.0814141	0.102196	0.133754	0.172664	0.217619	0.269632	0.321885	0.364687	0.389442	0.392055	0.371722	0.331528	0.281051	0.232308	0.193717	0.157901	0.120053	0.0850369	0.0618164	0.0535369	0.0505998	0.0470629	0.0399831	0.0306818	0.0214551	0.0141439	0.00956936	0.00714505	0.00619718	0.00629828	0.00621293	0.00633255
1	-1	1	1	0.0576904	0.0495724	0.0446816	0.0517952	0.0535482	0.0643412	0.093291	0.109328	0.1206	0.127202	0.128253	0.124998	0.117099	0.10848	0.106591	0.116198	0.133894	0.159031	0.196946	0.240336	0.285877	0.327769	0.356699	0.366943	0.358396	0.334418	0.300018	0.263883	0.230752	0.197341	0.16059	0.125719	0.102258	0.0888035	0.0797438	0.0715466	0.0599158	0.0458225	0.0331083	0.0242822	0.0193373	0.0170647	0.0157388	0.0149573	0.0143783	0.0141464
1	-1	1	1	0.0679894	0.0643583	0.0683331	0.0754348	0.0766792	0.0944476	0.121559	0.137257	0.14731	0.14989	0.146806	0.141015	0.130428	0.120125	0.123605	0.142561	0.171623	0.208633	0.252796	0.304476	0.361673	0.413224	0.445808	0.453467	0.438046	0.406455	0.363621	0.320295	0.282268	0.241944	0.196353	0.153518	0.123489	0.107422	0.0982157	0.0890757	0.0750481	0.0576177	0.0425013	0.0324728	0.026286	0.0226968	0.0199899	0.0177326	0.0162106	0.0161053
1	-1	1	1	0.0379922	0.0537246	0.0668593	0.0674654	0.0647977	0.0775615	0.0975552	0.107128	0.11071	0.111919	0.109979	0.104704	0.0952009	0.0884745	0.0951372	0.116799	0.148484	0.184701	0.226288	0.273731	0.321514	0.361504	0.387145	0.392423	0.37711	0.346204	0.306558	0.268576	0.235779	0.201924	0.165267	0.129552	0.103885	0.0898679	0.0803919	0.0710539	0.0594864	0.0452137	0.0322711	0.0233961	0.017965	0.0148315	0.0125592	0.011035	0.0102292	0.0109045
1	-1	1	1	0.0311228	0.0347391	0.0460479	0.0544109	0.0598072	0.0707918	0.0948634	0.113623	0.124033	0.12728	0.1253	0.121118	0.1124	0.102469	0.102787	0.11496	0.135132	0.162148	0.206624	0.280617	0.373867	0.463295	0.528684	0.562646	0.566366	0.541258	0.490449	0.422574	0.346896	0.2635	0.174569	0.0935838	0.0425108	0.0262733	0.0259189	0.0259741	0.0214655	0.0160609	0.012875	0.0105054	0.00844772	0.00673091	0.00497876	0.00348606	0.00236558	0.0016708
1	-1	1	1	0.0473704	0.0531151	0.0700985	0.0807289	0.082397	0.108722	0.140586	0.156297	0.165096	0.166027	0.162539	0.155051	0.141505	0.129508	0.129958	0.149257	0.183887	0.2297	0.292078	0.377908	0.476928	0.56758	0.631782	0.661499	0.655386	0.615908	0.551022	0.472796	0.386922	0.295328	0.201934	0.1192	0.0661812	0.0458797	0.0405361	0.0373128	0.0310268	0.023629	0.0178217	0.0144001	0.0121778	0.0106045	0.0089908	0.00760554	0.00658084	0.00574368
1	-1	1	1	0.100122	0.0890598	0.0869076	0.095637	0.0884401	0.107025	0.136783	0.150792	0.161172	0.165995	0.163835	0.1585	0.149099	0.139535	0.14244	0.159782	0.190207	0.228118	0.275512	0.347546	0.440943	0.533955	0.602052	0.636435	0.636104	0.604726	0.549043	0.479865	0.403293	0.316045	0.222828	0.134442	0.0726392	0.0499802	0.0477821	0.0461653	0.0387438	0.02965	0.0226703	0.0185325	0.0159109	0.0133469	0.0107852	0.00913581	0.00813905	0.00719443
1	-1	1	1	0.0437337	0.0298306	0.0152231	0.0189414	0.0233496	0.0455127	0.0771474	0.0988319	0.112567	0.121911	0.12395	0.11698	0.104308	0.0969161	0.0984571	0.110556	0.137932	0.176088	0.21719	0.286034	0.375129	0.456629	0.515429	0.546969	0.546855	0.515235	0.464118	0.405113	0.339815	0.267862	0.193955	0.123178	0.0697081	0.0543558	0.0548696	0.0513415	0.0434864	0.034654	0.0249813	0.0164631	0.0121486	0.0104732	0.00923439	0.00872738	0.00858157	0.00844541
1	-1	1	1	0.0572799	0.0448877	0.0323902	0.0457608	0.0691142	0.088464	0.118589	0.138475	0.153001	0.161192	0.159303	0.14813	0.132456	0.118611	0.11544	0.138336	0.175498	0.215018	0.270585	0.358003	0.46361	0.563704	0.636178	0.673089	0.671219	0.63297	0.56808	0.487234	0.40505	0.326422	0.238557	0.151217	0.0949167	0.0778583	0.0750122	0.0712118	0.0605748	0.0478413	0.0352665	0.0248313	0.0184398	0.014673	0.0124496	0.0111641	0.00999515	0.00958895
1	-1	1	1	0.0412332	0.0310191	0.0222583	0.0210525	0.0317255	0.0440621	0.0637866	0.0750509	0.084998	0.0914609	0.0909433	0.0844971	0.0729882	0.0657545	0.0715024	0.089108	0.115238	0.148994	0.190921	0.255022	0.340173	0.423557	0.485103	0.515563	0.51409	0.483419	0.43256	0.372768	0.308151	0.23805	0.164476	0.0964754	0.0488917	0.0351004	0.0395408	0.0411232	0.0354973	0.0270715	0.0187387	0.0117321	0.00782604	0.00617561	0.0053299	0.00499172	0.00476245	0.00487504
1	-1	-1	1	0.0218	0.0258	0.0271	0.0271	0.029	0.0316	0.0492	0.0572	0.0594	0.0605	0.0583	0.0524	0.0423	0.0357	0.0404	0.0553	0.0761	0.101	0.126	0.144	0.154	0.157	0.155	0.147	0.134	0.121	0.115	0.127	0.155	0.189	0.216	0.235	0.241	0.237	0.222	0.199	0.169	0.134	0.0997	0.0716	0.0531	0.0434	0.0388	0.0374	0.0372	0.0395
1	-1	-1	1	0.0145	0.0101	0.00757	0.00858	0.0144	0.0232	0.039	0.0473	0.0518	0.0524	0.0502	0.045	0.0367	0.0301	0.0321	0.0448	0.0639	0.0852	0.106	0.12	0.13	0.133	0.131	0.124	0.112	0.101	0.0959	0.107	0.134	0.165	0.192	0.211	0.218	0.215	0.204	0.184	0.157	0.126	0.0922	0.0649	0.0475	0.0394	0.0347	0.032	0.0312	0.0323
1	-1	-1	1	0.0214	0.0174	0.0162	0.0202	0.0222	0.0312	0.0402	0.046	0.0491	0.049	0.0454	0.0397	0.0314	0.0247	0.0264	0.0394	0.0577	0.0759	0.0926	0.107	0.117	0.122	0.122	0.116	0.105	0.0957	0.0919	0.102	0.125	0.152	0.173	0.187	0.192	0.188	0.176	0.157	0.132	0.103	0.0749	0.053	0.0385	0.0317	0.029	0.028	0.0274	0.0285
1	-1	-1	1	0.046	0.0342	0.0258	0.0266	0.0286	0.0426	0.0699	0.083	0.0896	0.0913	0.0873	0.0778	0.0626	0.0514	0.0569	0.0785	0.107	0.139	0.168	0.189	0.197	0.194	0.181	0.159	0.128	0.0946	0.0663	0.0579	0.0721	0.0936	0.11	0.12	0.124	0.122	0.115	0.103	0.0872	0.0686	0.0494	0.0333	0.0224	0.0176	0.0165	0.0163	0.016	0.0165
1	-1	-1	1	0.0108	0.0149	0.0163	0.0211	0.0322	0.0546	0.08	0.0915	0.0969	0.0975	0.0922	0.0798	0.0616	0.046	0.048	0.0733	0.111	0.151	0.185	0.209	0.22	0.219	0.207	0.184	0.152	0.115	0.082	0.067	0.0769	0.0999	0.118	0.129	0.132	0.129	0.12	0.107	0.0907	0.0718	0.0519	0.0359	0.0251	0.0197	0.0172	0.0164	0.0158	0.0162
1	-1	-1	1	0.00593	0.0125	0.0166	0.0165	0.0222	0.0394	0.0645	0.0749	0.0802	0.082	0.0786	0.0701	0.0554	0.0421	0.0452	0.0655	0.0948	0.126	0.155	0.174	0.182	0.181	0.17	0.15	0.122	0.0925	0.0659	0.0554	0.0665	0.0862	0.102	0.112	0.115	0.112	0.104	0.092	0.0765	0.0593	0.0419	0.0279	0.0181	0.0135	0.0122	0.0123	0.0124	0.0129
1	-1	-1	1	0.0114	0.0224	0.0348	0.0412	0.0548	0.0802	0.111	0.125	0.13	0.129	0.121	0.108	0.0887	0.0717	0.0778	0.109	0.153	0.199	0.237	0.263	0.275	0.271	0.252	0.221	0.178	0.131	0.0883	0.0637	0.0687	0.0882	0.104	0.111	0.113	0.11	0.104	0.093	0.0795	0.0643	0.0478	0.0344	0.0253	0.0198	0.0181	0.0181	0.0181	0.0186
1	-1	-1	1	0.0425	0.0475	0.054	0.0613	0.0682	0.0882	0.121	0.133	0.138	0.135	0.127	0.113	0.0931	0.0745	0.0782	0.106	0.144	0.186	0.223	0.247	0.257	0.252	0.234	0.205	0.165	0.121	0.0796	0.0585	0.0678	0.0891	0.106	0.115	0.119	0.117	0.111	0.102	0.0897	0.0753	0.0593	0.0444	0.0343	0.03	0.0286	0.0283	0.0281	0.0279
1	-1	-1	1	0.0244	0.0189	0.0181	0.0295	0.0469	0.0727	0.114	0.132	0.143	0.146	0.139	0.123	0.0994	0.081	0.0893	0.124	0.17	0.22	0.264	0.29	0.301	0.297	0.277	0.242	0.192	0.136	0.088	0.0653	0.0751	0.0979	0.116	0.124	0.126	0.123	0.116	0.104	0.0878	0.0694	0.0496	0.0337	0.024	0.0193	0.0172	0.0164	0.0158	0.0163
1	-1	-1	1	0.114	0.0721	0.0526	0.0678	0.077	0.104	0.158	0.188	0.208	0.21	0.202	0.183	0.156	0.136	0.143	0.181	0.232	0.285	0.336	0.371	0.384	0.375	0.345	0.296	0.232	0.161	0.096	0.0602	0.0596	0.0729	0.0819	0.0846	0.0846	0.0813	0.0751	0.0669	0.0571	0.0462	0.0352	0.0262	0.0197	0.0164	0.0145	0.0136	0.0125	0.012
1	-1	-1	1	0.0187	0.033	0.0446	0.0396	0.0508	0.0861	0.146	0.175	0.188	0.192	0.186	0.169	0.138	0.111	0.109	0.138	0.181	0.229	0.277	0.309	0.322	0.315	0.291	0.251	0.197	0.136	0.0797	0.0463	0.0439	0.0553	0.0631	0.0653	0.065	0.0628	0.0582	0.0519	0.0442	0.0355	0.0264	0.0187	0.0132	0.00995	0.00811	0.00716	0.00649	0.00654
1	-1	-1	1	0.0587	0.0557	0.0625	0.0752	0.0966	0.13	0.18	0.208	0.222	0.223	0.212	0.192	0.16	0.134	0.141	0.187	0.249	0.309	0.365	0.402	0.416	0.407	0.374	0.322	0.252	0.173	0.0995	0.0554	0.051	0.0667	0.0774	0.0804	0.0794	0.0759	0.0705	0.0634	0.0545	0.0443	0.0333	0.0245	0.0185	0.0151	0.0132	0.0123	0.0117	0.012
1	-1	-1	1	0.103	0.103	0.106	0.111	0.124	0.163	0.232	0.267	0.284	0.286	0.274	0.25	0.213	0.182	0.187	0.23	0.291	0.358	0.422	0.464	0.48	0.468	0.43	0.368	0.288	0.2	0.119	0.0691	0.0602	0.0699	0.0758	0.0765	0.0745	0.0701	0.0635	0.0558	0.047	0.0382	0.0297	0.0233	0.0184	0.0148	0.0123	0.0113	0.011	0.0112
1	-1	-1	1	0.244	0.167	0.114	0.104	0.114	0.173	0.248	0.283	0.31	0.317	0.305	0.277	0.233	0.191	0.186	0.228	0.295	0.369	0.433	0.474	0.491	0.481	0.443	0.381	0.299	0.206	0.117	0.0612	0.0524	0.0661	0.075	0.0756	0.0731	0.0696	0.0645	0.0572	0.0487	0.0398	0.0301	0.0221	0.0168	0.0143	0.0129	0.0115	0.0102	0.00994
1	-1	-1	1	0.153	0.0853	0.0388	0.0411	0.0671	0.105	0.177	0.209	0.233	0.241	0.232	0.211	0.175	0.142	0.146	0.188	0.246	0.307	0.368	0.405	0.417	0.406	0.372	0.318	0.246	0.164	0.0851	0.0366	0.0313	0.0456	0.0528	0.0531	0.0525	0.0509	0.0478	0.043	0.0366	0.0293	0.0213	0.0152	0.0115	0.00916	0.0072	0.00576	0.00469	0.00454
-1	1	-1	-1	0.13	0.142	0.16	0.195	0.247	0.273	0.281	0.265	0.248	0.217	0.182	0.143	0.105	0.0784	0.0618	0.0525	0.0513	0.0611	0.0794	0.0968	0.115	0.132	0.149	0.17	0.192	0.219	0.251	0.288	0.327	0.361	0.389	0.407	0.411	0.402	0.382	0.353	0.323	0.293	0.267	0.25	0.247	0.255	0.266	0.277	0.285	0.286
-1	1	-1	-1	0.174	0.163	0.168	0.192	0.256	0.303	0.308	0.29	0.274	0.243	0.204	0.161	0.116	0.0815	0.0616	0.0564	0.0612	0.0692	0.0822	0.1	0.121	0.14	0.158	0.176	0.197	0.221	0.249	0.284	0.32	0.354	0.381	0.396	0.401	0.396	0.378	0.352	0.322	0.293	0.268	0.253	0.248	0.256	0.269	0.283	0.291	0.294
-1	1	-1	-1	0.0906	0.117	0.157	0.208	0.271	0.316	0.32	0.297	0.279	0.245	0.204	0.161	0.119	0.0875	0.0679	0.0618	0.0678	0.0768	0.0879	0.103	0.119	0.139	0.162	0.186	0.211	0.243	0.281	0.322	0.364	0.402	0.431	0.446	0.449	0.438	0.414	0.383	0.351	0.32	0.296	0.284	0.28	0.287	0.301	0.316	0.328	0.333
-1	1	1	-1	0.037	0.0485	0.0581	0.0561	0.0674	0.0722	0.0729	0.0721	0.0697	0.0671	0.063	0.0601	0.0563	0.0569	0.0618	0.0642	0.0544	0.0401	0.0622	0.218	0.469	0.733	0.962	1.13	1.24	1.63	1.24	1.13	0.96	0.731	0.467	0.221	0.065	0.043	0.0593	0.0647	0.0611	0.0553	0.0489	0.0439	0.0417	0.0419	0.0428	0.0441	0.0446	0.0444
-1	1	1	-1	0.00094	0.0181	0.0377	0.0516	0.0635	0.0705	0.0757	0.079	0.081	0.0791	0.0779	0.0772	0.0758	0.0768	0.0793	0.0783	0.0701	0.0608	0.0778	0.253	0.537	0.84	1.1	1.29	1.41	2.08	1.4	1.28	1.08	0.826	0.533	0.257	0.0731	0.0537	0.0746	0.0838	0.0776	0.0679	0.0601	0.0535	0.0496	0.0488	0.0496	0.0511	0.0525	0.0531
-1	1	1	-1	0.094	0.0672	0.051	0.0618	0.0857	0.0982	0.102	0.101	0.102	0.0981	0.0911	0.0833	0.0765	0.0741	0.0758	0.0775	0.0732	0.0705	0.0979	0.251	0.526	0.822	1.08	1.27	1.39	1.77	1.39	1.27	1.08	0.831	0.548	0.282	0.0986	0.0583	0.0847	0.0936	0.0865	0.0775	0.0696	0.0621	0.0572	0.0553	0.0553	0.0556	0.056	0.0563
-1	1	1	-1	0.108	0.0958	0.0877	0.0974	0.139	0.157	0.165	0.161	0.158	0.148	0.131	0.114	0.0986	0.0925	0.0948	0.0949	0.0904	0.0873	0.117	0.248	0.454	0.672	0.861	1.01	1.1	1.14	1.12	1.04	0.91	0.731	0.526	0.332	0.205	0.177	0.178	0.171	0.158	0.144	0.131	0.119	0.113	0.113	0.117	0.121	0.125	0.126
-1	1	1	-1	0.0843	0.082	0.0788	0.0884	0.124	0.138	0.14	0.136	0.131	0.12	0.107	0.092	0.0778	0.0702	0.0679	0.0646	0.0584	0.057	0.0953	0.223	0.423	0.642	0.832	0.973	1.06	1.09	1.07	0.992	0.858	0.681	0.481	0.296	0.178	0.145	0.15	0.153	0.141	0.123	0.11	0.103	0.101	0.104	0.108	0.113	0.116	0.118
-1	1	1	-1	0.0549	0.0475	0.0401	0.0448	0.0826	0.101	0.108	0.111	0.113	0.11	0.1	0.0896	0.0777	0.0701	0.067	0.0617	0.0529	0.0452	0.0616	0.18	0.374	0.583	0.767	0.909	1	1.04	1.03	0.953	0.828	0.66	0.469	0.284	0.158	0.133	0.138	0.136	0.126	0.114	0.104	0.0962	0.0918	0.0935	0.0982	0.103	0.106	0.106
-1	1	1	-1	0.0661	0.052	0.0553	0.0878	0.121	0.141	0.146	0.145	0.144	0.132	0.115	0.0986	0.0833	0.0729	0.0676	0.0641	0.0586	0.0534	0.0731	0.177	0.349	0.533	0.695	0.823	0.906	0.944	0.936	0.884	0.787	0.65	0.488	0.33	0.221	0.192	0.191	0.182	0.167	0.151	0.136	0.126	0.123	0.127	0.134	0.14	0.144	0.145
-1	1	1	-1	0.0953	0.0603	0.056	0.102	0.175	0.21	0.21	0.192	0.187	0.167	0.14	0.113	0.0878	0.0709	0.0704	0.0742	0.0716	0.0836	0.127	0.244	0.425	0.618	0.786	0.913	0.993	1.03	1.01	0.944	0.832	0.679	0.506	0.353	0.248	0.213	0.209	0.199	0.178	0.159	0.144	0.137	0.136	0.138	0.144	0.15	0.155	0.155
-1	1	1	-1	0.0477	0.0589	0.0743	0.102	0.13	0.145	0.143	0.134	0.128	0.115	0.0979	0.0828	0.0712	0.0633	0.0593	0.0583	0.0572	0.0582	0.0851	0.175	0.316	0.473	0.611	0.717	0.785	0.814	0.803	0.753	0.666	0.549	0.413	0.284	0.199	0.175	0.172	0.168	0.155	0.14	0.126	0.116	0.112	0.112	0.116	0.119	0.122	0.122
-1	1	1	-1	0.121	0.108	0.105	0.136	0.181	0.217	0.222	0.213	0.207	0.189	0.162	0.131	0.105	0.0858	0.0751	0.0738	0.0737	0.0762	0.0961	0.168	0.278	0.396	0.5	0.583	0.639	0.671	0.677	0.661	0.62	0.553	0.466	0.38	0.32	0.302	0.292	0.274	0.249	0.224	0.202	0.188	0.182	0.186	0.196	0.203	0.208	0.21
-1	1	1	-1	0.0751	0.0946	0.119	0.141	0.216	0.245	0.251	0.238	0.225	0.202	0.173	0.141	0.105	0.0821	0.0777	0.0803	0.0787	0.0789	0.104	0.179	0.29	0.41	0.515	0.6	0.662	0.697	0.702	0.682	0.638	0.567	0.476	0.386	0.326	0.307	0.296	0.279	0.255	0.232	0.214	0.201	0.195	0.198	0.203	0.21	0.215	0.216
-1	1	1	-1	0.114	0.0968	0.105	0.147	0.205	0.248	0.269	0.257	0.249	0.226	0.193	0.161	0.13	0.105	0.0892	0.085	0.0892	0.101	0.135	0.217	0.333	0.458	0.568	0.657	0.72	0.757	0.764	0.743	0.694	0.622	0.531	0.439	0.376	0.356	0.344	0.326	0.301	0.276	0.255	0.24	0.234	0.236	0.243	0.25	0.255	0.257
-1	1	1	-1	0.15	0.135	0.121	0.142	0.203	0.246	0.247	0.228	0.218	0.198	0.167	0.132	0.0994	0.076	0.066	0.0659	0.0687	0.0767	0.0973	0.15	0.228	0.316	0.398	0.465	0.519	0.559	0.579	0.579	0.559	0.52	0.467	0.413	0.372	0.353	0.337	0.317	0.291	0.264	0.243	0.228	0.217	0.217	0.224	0.235	0.242	0.245
-1	1	1	-1	0.131	0.115	0.113	0.142	0.223	0.266	0.276	0.265	0.257	0.234	0.2	0.16	0.119	0.0903	0.0778	0.0727	0.0715	0.078	0.101	0.155	0.236	0.324	0.404	0.471	0.52	0.553	0.571	0.573	0.557	0.521	0.471	0.418	0.376	0.354	0.337	0.317	0.291	0.265	0.242	0.228	0.226	0.232	0.242	0.252	0.258	0.261
-1	1	1	-1	0.166	0.132	0.126	0.153	0.239	0.275	0.29	0.282	0.277	0.254	0.223	0.187	0.144	0.114	0.104	0.0973	0.0938	0.0981	0.122	0.185	0.271	0.365	0.455	0.532	0.591	0.631	0.653	0.659	0.647	0.615	0.563	0.502	0.454	0.432	0.41	0.385	0.355	0.323	0.295	0.279	0.275	0.28	0.292	0.303	0.308	0.308
-1	1	1	1	0.0107812	0.0126643	0.0208738	0.0307635	0.0358741	0.0365914	0.0376613	0.0362753	0.0344433	0.0299593	0.0249935	0.0218715	0.0204241	0.0200554	0.0202079	0.0201769	0.0209089	0.0261274	0.0383473	0.0633242	0.102657	0.147512	0.189606	0.223532	0.245915	0.259211	0.265322	0.263766	0.252696	0.232893	0.206941	0.179394	0.155054	0.140016	0.131054	0.120049	0.104603	0.0860916	0.0671476	0.053098	0.0457861	0.0435024	0.0434047	0.0446029	0.0453034	0.0455741
-1	1	1	1	0.0186341	0.0137376	0.014093	0.021919	0.0315734	0.0353677	0.0381194	0.0369157	0.0365958	0.033766	0.0299494	0.0262238	0.022988	0.0215218	0.0217199	0.0217459	0.0212256	0.0234537	0.0349021	0.0596242	0.0975876	0.140468	0.179139	0.210871	0.231993	0.244822	0.250796	0.249239	0.239657	0.22139	0.194928	0.167222	0.147041	0.135197	0.127221	0.116227	0.100741	0.0837222	0.0663924	0.0541147	0.0477363	0.045671	0.046039	0.0468976	0.0467685	0.0464911
-1	1	1	1	0.0291173	0.0213335	0.0170564	0.0275107	0.0339326	0.0394522	0.0418588	0.040535	0.0410784	0.0400897	0.0357697	0.0299841	0.0251824	0.0224044	0.0205517	0.0220719	0.0264263	0.034593	0.0502176	0.0801814	0.125858	0.178735	0.226859	0.263028	0.285354	0.295304	0.296449	0.290798	0.276157	0.25337	0.224103	0.193225	0.16792	0.154225	0.146765	0.136554	0.119963	0.100371	0.0819426	0.0672091	0.0580953	0.054764	0.0539795	0.054659	0.0550287	0.0553647
-1	1	1	1	0.0223149	0.0139431	0.0130107	0.0220824	0.029045	0.0300344	0.0323487	0.0310126	0.0303069	0.0268121	0.0220648	0.0179595	0.0151929	0.0133096	0.0128406	0.0132052	0.0131285	0.0146209	0.0228211	0.0428714	0.0744669	0.109526	0.14092	0.166401	0.183652	0.194501	0.201932	0.205757	0.204011	0.196282	0.181554	0.163056	0.148405	0.140055	0.132576	0.120409	0.103148	0.0834742	0.0634549	0.0480727	0.0396455	0.0368801	0.0371102	0.0390195	0.0406629	0.0416509
-1	1	1	1	0.0435593	0.0410935	0.0380509	0.0388268	0.0388902	0.0350492	0.034847	0.0314983	0.0285265	0.025192	0.022692	0.0193062	0.0175882	0.0174352	0.017676	0.018345	0.0183686	0.0218133	0.0331591	0.0585698	0.098268	0.14123	0.179167	0.209357	0.229673	0.241439	0.247664	0.247782	0.240711	0.226151	0.202834	0.177763	0.158298	0.148481	0.141729	0.128647	0.110115	0.0901582	0.0709449	0.0560802	0.0482759	0.0459076	0.0464807	0.0477994	0.0475106	0.0479164
-1	1	1	1	0.0252681	0.0145709	0.0109293	0.0234317	0.0370063	0.0442038	0.0480881	0.0465441	0.0467345	0.0436216	0.0380996	0.0324918	0.027439	0.0249647	0.024079	0.0246064	0.0257002	0.0304405	0.0446154	0.0722861	0.1128	0.15716	0.196629	0.228476	0.250598	0.264692	0.272285	0.273547	0.267852	0.254491	0.233747	0.211572	0.194805	0.183509	0.173041	0.15727	0.135491	0.111816	0.0889256	0.0711086	0.0606142	0.0567717	0.0567947	0.0585679	0.0602401	0.0613309
-1	1	1	1	0.0533713	0.0359657	0.0271574	0.0343748	0.0456251	0.0553617	0.0589583	0.0579941	0.0594633	0.0581639	0.0546196	0.0505804	0.046659	0.045041	0.0460934	0.0502153	0.0542663	0.0643558	0.0936007	0.151237	0.237354	0.329147	0.409313	0.470876	0.50728	0.519168	0.507584	0.473052	0.41746	0.345411	0.262804	0.188209	0.137292	0.112765	0.105615	0.0967543	0.0843162	0.0721196	0.0605626	0.0526551	0.0488837	0.047817	0.048351	0.0495585	0.0497611	0.0497928
-1	1	1	1	0.0116123	0.0113665	0.014047	0.0231192	0.0298863	0.0321163	0.0354752	0.0336365	0.0331082	0.0311299	0.0272698	0.0234451	0.02127	0.0217879	0.0243588	0.0268569	0.0281513	0.0363855	0.0553486	0.0961675	0.162499	0.239058	0.308638	0.361008	0.392393	0.40493	0.39904	0.375388	0.334415	0.277555	0.211039	0.14879	0.101595	0.0790789	0.0741366	0.0703483	0.0618045	0.0509622	0.0407894	0.0338448	0.0296922	0.0288158	0.0295198	0.0301732	0.0306149	0.030726
-1	1	1	1	0.0248336	0.0167463	0.0160956	0.0239734	0.0337618	0.0370065	0.043355	0.044235	0.045735	0.0439584	0.0402353	0.0367436	0.034112	0.0324582	0.0322721	0.0315587	0.0293321	0.0303399	0.0472185	0.0934607	0.166928	0.246903	0.31725	0.370943	0.403607	0.417536	0.413605	0.390002	0.347725	0.289915	0.221227	0.155451	0.110584	0.0938276	0.0908007	0.0841054	0.0725366	0.0594674	0.0463978	0.0374128	0.0327668	0.0312024	0.0319614	0.0332462	0.0331409	0.0326316
-1	1	1	1	0.0284985	0.0259193	0.0328612	0.0425439	0.0460238	0.0505313	0.0584827	0.0575644	0.0576659	0.0541989	0.050627	0.0478546	0.0450284	0.0434681	0.0430309	0.0440307	0.0455387	0.0500174	0.0656496	0.10286	0.163119	0.23079	0.291571	0.338159	0.368624	0.385393	0.389128	0.380103	0.356106	0.317007	0.266387	0.214161	0.174871	0.156144	0.14757	0.134471	0.115047	0.0935636	0.0742842	0.0611668	0.0539691	0.0512867	0.0505788	0.0509564	0.0513268	0.051737
-1	1	1	1	0.02738	0.0186408	0.0143535	0.022798	0.0297402	0.0302525	0.0312963	0.0305462	0.0310118	0.0296249	0.0276265	0.0250866	0.0229943	0.023634	0.0252945	0.025826	0.0261571	0.029211	0.0405599	0.0725226	0.124085	0.181048	0.231884	0.272501	0.300091	0.314372	0.317232	0.310771	0.29206	0.260332	0.220362	0.179426	0.147929	0.133354	0.12547	0.113283	0.0957986	0.0773284	0.0600484	0.0463845	0.0387272	0.0364401	0.0354063	0.0352846	0.0355827	0.0360135
-1	1	1	1	0.0287338	0.0231288	0.0236422	0.0283552	0.0361375	0.0404032	0.0416991	0.0400001	0.0389155	0.0363319	0.0330967	0.031062	0.0298541	0.0304314	0.0323032	0.0335729	0.0351594	0.0397627	0.0546668	0.0912646	0.147485	0.209407	0.265535	0.31025	0.338884	0.35372	0.355193	0.343529	0.317521	0.278734	0.231906	0.185193	0.150019	0.132738	0.123806	0.112769	0.0970555	0.079195	0.0614091	0.0481443	0.0404821	0.0384115	0.0387666	0.0396228	0.0399384	0.03996
-1	1	1	1	0.0240285	0.0159735	0.0157533	0.0269897	0.0332343	0.0341752	0.0403765	0.0429568	0.0452446	0.0446113	0.0428188	0.0418768	0.0433816	0.0459812	0.04772	0.0482653	0.0469638	0.0532763	0.0799274	0.141601	0.234698	0.336567	0.426753	0.494709	0.537111	0.553265	0.542257	0.503101	0.436761	0.350381	0.252886	0.164091	0.102516	0.0759384	0.0699508	0.0650799	0.0561579	0.0465355	0.0395126	0.0350638	0.0323982	0.0315831	0.0313306	0.031456	0.0311117	0.0307518
-1	1	1	1	0.0320645	0.0243244	0.0254371	0.0345103	0.0399556	0.0385341	0.041929	0.0438655	0.0456841	0.0439295	0.0418298	0.0415008	0.0422164	0.0444244	0.0472863	0.0473744	0.0451019	0.0477194	0.0725752	0.139808	0.242873	0.355081	0.453288	0.528321	0.575204	0.591988	0.578425	0.536121	0.465946	0.371881	0.265949	0.168263	0.103113	0.0794173	0.0755426	0.0709444	0.0619285	0.0529759	0.0440477	0.0365297	0.0325269	0.0318099	0.0317902	0.0319107	0.0317804	0.0315001
-1	1	1	1	0.033494	0.0287504	0.0287457	0.0365909	0.043974	0.0476429	0.0529859	0.0527299	0.0540505	0.0535624	0.0525435	0.0517448	0.05199	0.0545085	0.057903	0.0617386	0.0635216	0.0690284	0.0958141	0.164431	0.270641	0.386269	0.487896	0.565191	0.611819	0.626559	0.610634	0.56481	0.49174	0.396367	0.285893	0.18352	0.115237	0.0892889	0.0859093	0.0817681	0.0724024	0.062375	0.0522302	0.0445174	0.040775	0.0400292	0.0404122	0.0410271	0.0408442	0.040362
-1	1	1	1	0.0296006	0.0192555	0.0190344	0.0307301	0.0405796	0.0399904	0.0419732	0.0404571	0.0411578	0.0387215	0.0350299	0.0328907	0.0321479	0.0341211	0.0375047	0.0387342	0.0385835	0.0463183	0.0745169	0.134735	0.225738	0.32439	0.411156	0.476396	0.515316	0.528424	0.515958	0.479416	0.419598	0.341221	0.253782	0.174717	0.12055	0.0975232	0.0924623	0.0855754	0.073594	0.0599039	0.0468301	0.0370346	0.0314955	0.0300623	0.0306097	0.0318941	0.0324844	0.0324518
-1	1	1	1	0.0373091	0.0321326	0.0322625	0.0387065	0.0499447	0.053589	0.0554957	0.0543771	0.0543391	0.0518727	0.0486762	0.0461844	0.0431225	0.0431345	0.0443974	0.0454414	0.0468254	0.052232	0.0743998	0.139143	0.242469	0.354603	0.452975	0.52862	0.576395	0.595294	0.584234	0.545191	0.47977	0.393777	0.296139	0.202629	0.136549	0.1132	0.1097	0.102663	0.0902767	0.0767808	0.063931	0.0543649	0.0482532	0.0459815	0.0463495	0.0477661	0.0478834	0.0472582
-1	1	1	1	0.0623472	0.0452511	0.0327252	0.0404794	0.0462475	0.0473974	0.0491108	0.0495325	0.0507347	0.0507073	0.050185	0.0483402	0.0476568	0.0498611	0.0526501	0.055121	0.0582112	0.0668395	0.088066	0.144406	0.240183	0.349758	0.447679	0.524235	0.573914	0.594689	0.586847	0.553438	0.494589	0.414242	0.321472	0.231038	0.161153	0.130106	0.123815	0.116715	0.102324	0.0863996	0.0719185	0.0607995	0.0532185	0.0502078	0.0497479	0.0499651	0.0501159	0.0505391
-1	1	1	1	0.0353882	0.0353725	0.0437547	0.0533072	0.06182	0.0586883	0.0602781	0.0579112	0.0562727	0.0523428	0.0493304	0.0478057	0.0452339	0.0455679	0.0492314	0.0519336	0.0518489	0.0551316	0.0755302	0.130864	0.222224	0.325287	0.418715	0.49076	0.535462	0.553699	0.547008	0.518727	0.468662	0.397718	0.312154	0.228499	0.168053	0.142431	0.137296	0.129831	0.114914	0.0957357	0.0765112	0.0621276	0.0539852	0.0509894	0.0507192	0.0516717	0.0517368	0.0513045
-1	1	1	1	0.0257502	0.0169439	0.0148917	0.0218489	0.029175	0.0315057	0.0354043	0.0351976	0.0365342	0.0356625	0.0335068	0.0318482	0.030721	0.0305645	0.0312095	0.0321319	0.0318549	0.0351282	0.0525546	0.0990522	0.174868	0.260516	0.338395	0.398713	0.436639	0.452503	0.447384	0.422671	0.378726	0.318478	0.246511	0.177519	0.128362	0.108097	0.103995	0.0977873	0.0856597	0.0706908	0.0555611	0.0435406	0.0366373	0.0344482	0.0340345	0.0341173	0.0339014	0.0342193
-1	1	1	1	0.0475174	0.0351736	0.02534	0.047258	0.0508265	0.0538299	0.05786	0.0575694	0.0593002	0.0601725	0.0572134	0.0531655	0.0548244	0.0579241	0.0557792	0.0535266	0.0593929	0.0687629	0.0901547	0.160068	0.263191	0.364487	0.453216	0.523095	0.563783	0.576757	0.56603	0.529656	0.468435	0.392327	0.309034	0.225612	0.168206	0.155075	0.149902	0.133834	0.116915	0.100303	0.0814599	0.0663882	0.058775	0.0554742	0.0542767	0.0554945	0.0564729	0.0562694
-1	1	1	1	0.0440393	0.0450392	0.0637009	0.118274	0.156226	0.174216	0.18332	0.174553	0.165917	0.147311	0.121931	0.0988716	0.0797182	0.0683732	0.0608993	0.0573268	0.0598369	0.0690623	0.0899913	0.138372	0.208982	0.28622	0.356927	0.413239	0.451512	0.47511	0.483903	0.48034	0.460305	0.426241	0.381279	0.33108	0.292242	0.274736	0.262412	0.245696	0.2231	0.197892	0.174377	0.158443	0.151006	0.151481	0.153818	0.1573	0.159648	0.158671
-1	1	1	1	0.141892	0.0816502	0.0642869	0.0989847	0.149402	0.176636	0.185348	0.176872	0.175568	0.157302	0.131366	0.107127	0.0843098	0.0673421	0.0615605	0.0625182	0.0613775	0.0650932	0.0839195	0.128012	0.197398	0.274981	0.346936	0.404948	0.448818	0.481842	0.502309	0.506275	0.490302	0.457369	0.40943	0.356875	0.313034	0.287286	0.269913	0.246883	0.218507	0.190048	0.168803	0.157002	0.152226	0.153567	0.1594	0.166323	0.170214	0.171483
-1	1	1	1	0.064479	0.0469495	0.0469248	0.0759115	0.098477	0.111998	0.116362	0.114002	0.112981	0.10325	0.0879815	0.0732615	0.0612147	0.0524111	0.0473346	0.0458398	0.0450748	0.0483748	0.0640829	0.106035	0.172375	0.244038	0.30372	0.348035	0.379471	0.400068	0.410828	0.409821	0.393206	0.36246	0.321325	0.278202	0.245019	0.230723	0.222681	0.205563	0.179313	0.152539	0.13195	0.119915	0.115851	0.116732	0.120043	0.125163	0.128858	0.129963
-1	1	1	1	0.0476759	0.0381732	0.034186	0.0679687	0.0919099	0.0988247	0.106089	0.104148	0.102584	0.0949971	0.0818936	0.0661982	0.0544291	0.0475232	0.0409959	0.0372529	0.0365238	0.0382257	0.0521048	0.0813939	0.121367	0.163536	0.202086	0.234263	0.257598	0.274682	0.284972	0.289712	0.289986	0.283655	0.26603	0.244276	0.228617	0.217434	0.204527	0.185844	0.161911	0.137642	0.116679	0.101015	0.0917715	0.0908977	0.0937248	0.0960132	0.0974355	0.0992431
-1	1	1	1	0.0989523	0.0664425	0.0440788	0.0460417	0.0578622	0.060979	0.0680028	0.0668601	0.0680799	0.0643026	0.057087	0.049144	0.0417152	0.0358879	0.0325114	0.02955	0.0271277	0.0287628	0.039876	0.0658362	0.104832	0.147328	0.18607	0.21809	0.243739	0.264441	0.278326	0.284902	0.283531	0.273446	0.254105	0.230116	0.21068	0.198874	0.186778	0.169151	0.147079	0.125043	0.10638	0.0927663	0.0843267	0.0822076	0.0837674	0.0862552	0.0869483	0.0866353
-1	1	1	1	0.0654809	0.0432353	0.0341625	0.0533355	0.0754754	0.0793368	0.080844	0.0759574	0.0745578	0.0666564	0.0553778	0.0443463	0.0359882	0.0308891	0.0295945	0.0300451	0.0275156	0.0273937	0.0362377	0.057654	0.0945514	0.137341	0.175999	0.207005	0.230148	0.248791	0.261965	0.269471	0.269928	0.261794	0.243658	0.221055	0.202562	0.191616	0.182782	0.167752	0.146209	0.122976	0.102914	0.0887704	0.0801209	0.0784001	0.0806028	0.0836707	0.0850837	0.085113
-1	1	1	1	0.0575456	0.0561107	0.0557342	0.0848108	0.103792	0.115161	0.119383	0.115754	0.112169	0.104022	0.0919033	0.0786156	0.0701825	0.0635046	0.0616642	0.0661375	0.0696813	0.0768619	0.102439	0.15671	0.240497	0.332696	0.413126	0.47523	0.51426	0.532635	0.532506	0.516656	0.483836	0.432297	0.366765	0.302087	0.256011	0.234294	0.225628	0.211308	0.187411	0.160776	0.135512	0.117613	0.107383	0.104347	0.103942	0.104414	0.104594	0.104952
-1	1	1	1	0.0818981	0.0961844	0.126692	0.136573	0.14048	0.147732	0.148245	0.145493	0.138134	0.122233	0.10553	0.0963396	0.0900894	0.0840651	0.0796102	0.0805955	0.088004	0.103219	0.127633	0.179587	0.26932	0.369765	0.4566	0.518939	0.557	0.581597	0.590428	0.577064	0.540072	0.485609	0.421543	0.355318	0.297656	0.266583	0.254495	0.236907	0.211094	0.180146	0.15246	0.136055	0.128253	0.125366	0.123667	0.124742	0.126432	0.127781
-1	1	1	1	0.0481079	0.0506348	0.057721	0.0728416	0.0897691	0.092352	0.0967525	0.0949531	0.0921908	0.085245	0.0766754	0.0681829	0.0612567	0.0574544	0.0565594	0.0547596	0.0521813	0.0555789	0.076442	0.124127	0.194373	0.269122	0.336791	0.39077	0.426796	0.448275	0.453841	0.44223	0.412294	0.367293	0.312281	0.258054	0.219239	0.199717	0.186932	0.168972	0.147707	0.125127	0.103852	0.0899152	0.0804044	0.0748982	0.0734379	0.0746546	0.0757737	0.07611
-1	1	1	1	0.0504039	0.0420917	0.041718	0.0632727	0.0803779	0.0845527	0.0915539	0.0916947	0.0935226	0.090015	0.0826271	0.0755071	0.0706182	0.0686144	0.0702733	0.0736468	0.0774555	0.0900805	0.122142	0.190575	0.300744	0.420858	0.524836	0.601824	0.648301	0.664092	0.648563	0.603849	0.532001	0.438081	0.332107	0.23293	0.158998	0.12701	0.122864	0.114279	0.0997981	0.0856839	0.0746414	0.0678635	0.0649824	0.0647482	0.0659139	0.0677307	0.0684517	0.0678556
-1	1	1	1	0.0719504	0.0431095	0.0321719	0.0435378	0.0548648	0.0634937	0.0674569	0.0655633	0.0680243	0.063112	0.0572102	0.0527534	0.0482732	0.0474831	0.0486591	0.0502367	0.0510609	0.0577619	0.0839902	0.148576	0.239728	0.334825	0.418317	0.479697	0.515287	0.527867	0.515	0.477546	0.417144	0.336909	0.246892	0.167629	0.115867	0.0986568	0.094854	0.0885019	0.0785212	0.0673171	0.0574644	0.0518953	0.0489955	0.047744	0.0467918	0.0466019	0.0461635	0.0452295
-1	1	1	1	0.179291	0.101768	0.0517288	0.0439873	0.0488096	0.0497832	0.0536924	0.0528181	0.0604777	0.061262	0.0611488	0.059836	0.0570126	0.0555646	0.0564249	0.0582941	0.0618078	0.0727691	0.0948386	0.144799	0.230337	0.332519	0.427918	0.503771	0.554294	0.576085	0.568279	0.532783	0.472137	0.392288	0.300876	0.211004	0.138364	0.100837	0.0908985	0.086175	0.0779187	0.0700507	0.0640367	0.0577423	0.0534102	0.0515881	0.0513831	0.0526836	0.054072	0.0544526
-1	1	1	1	0.0163391	0.022274	0.0399602	0.0570712	0.0769098	0.0907754	0.102806	0.103668	0.104313	0.0989079	0.0899185	0.0810862	0.0706776	0.0613611	0.0544716	0.0489069	0.0453467	0.0520762	0.0782743	0.135299	0.228981	0.339788	0.441551	0.522548	0.578457	0.609097	0.611986	0.586021	0.532979	0.456891	0.365083	0.274946	0.204157	0.163923	0.146693	0.131269	0.109889	0.0887015	0.0721779	0.0610979	0.0548078	0.0540003	0.0566556	0.0604236	0.0629116	0.0644858
-1	1	1	1	0.0592093	0.0494693	0.0407096	0.0420781	0.0519161	0.0541631	0.0560031	0.0545178	0.0544305	0.0514048	0.046377	0.0416163	0.0389527	0.037968	0.0394239	0.04031	0.0407549	0.0455375	0.073759	0.130833	0.21388	0.302947	0.380436	0.43722	0.473444	0.48796	0.479519	0.447952	0.395803	0.327063	0.249958	0.179256	0.134412	0.114102	0.107833	0.100045	0.0873752	0.0730079	0.0611973	0.0521574	0.046567	0.0440817	0.0437062	0.0440292	0.0434609	0.0427305
-1	1	1	1	0.053574	0.0333022	0.0276059	0.0429832	0.0470286	0.0447532	0.0562201	0.0585534	0.0620374	0.060808	0.0579922	0.0560342	0.0548181	0.0525899	0.0505461	0.0467421	0.0432569	0.0487793	0.0734889	0.13333	0.221156	0.318536	0.407202	0.476103	0.519963	0.537628	0.530038	0.498252	0.443206	0.36856	0.283737	0.203882	0.145601	0.122755	0.113308	0.104423	0.0919061	0.0777103	0.0643279	0.054484	0.049139	0.0474255	0.0473372	0.0486285	0.0493258	0.0497231
-1	1	1	1	0.0356844	0.0311013	0.033935	0.0471772	0.0592619	0.0596148	0.0622688	0.0590207	0.0584294	0.0539915	0.0481119	0.0432101	0.0408739	0.0424441	0.0455123	0.0466885	0.045926	0.0491249	0.0669507	0.108019	0.176112	0.254867	0.325439	0.379741	0.416104	0.435298	0.436548	0.418698	0.380461	0.324876	0.25816	0.193258	0.145533	0.121791	0.11339	0.103817	0.0889882	0.0733947	0.0605581	0.0512421	0.0460988	0.0444223	0.0439157	0.0444991	0.0447546	0.0446862
-1	1	1	1	0.0216136	0.0244123	0.0301119	0.0391054	0.0463801	0.0499282	0.0578784	0.0600455	0.0608459	0.0575649	0.0541937	0.0502413	0.0461367	0.0445054	0.0431999	0.0409865	0.0394101	0.0443797	0.0688585	0.12312	0.204501	0.294906	0.374235	0.434378	0.473793	0.492242	0.488886	0.46495	0.419464	0.35561	0.281565	0.21181	0.163171	0.141374	0.133511	0.124091	0.108625	0.0919395	0.0774513	0.0671219	0.0606802	0.0577456	0.0565456	0.0557783	0.0548118	0.053731
-1	1	1	1	0.06154	0.0522147	0.0500022	0.0611436	0.0642552	0.0620887	0.0656683	0.0641776	0.0630968	0.0585998	0.0537945	0.0503035	0.0486584	0.0486533	0.0484279	0.0466774	0.0447273	0.0499977	0.0778386	0.136853	0.220493	0.308831	0.385713	0.444071	0.48122	0.496666	0.491049	0.465126	0.417319	0.350959	0.275736	0.20703	0.161946	0.142261	0.132936	0.120423	0.10344	0.0853112	0.0695443	0.0586404	0.0532658	0.0520451	0.0522217	0.053169	0.0537975	0.0540352
-1	1	1	1	0.123572	0.116565	0.110355	0.123864	0.15535	0.161649	0.160025	0.150731	0.142172	0.129884	0.114536	0.0962877	0.0805031	0.0737586	0.073095	0.0738915	0.0780218	0.0878672	0.10973	0.152291	0.211245	0.272688	0.328027	0.37224	0.404987	0.426396	0.435787	0.433458	0.417327	0.390875	0.355451	0.316545	0.285595	0.267587	0.252669	0.234342	0.212707	0.190572	0.172993	0.161169	0.154748	0.15433	0.157206	0.161007	0.161442	0.158757
-1	1	1	1	0.107084	0.0714927	0.0503032	0.0621542	0.0893218	0.098796	0.105065	0.101052	0.102063	0.0959335	0.0842312	0.0711181	0.0578396	0.0494921	0.0463587	0.0446429	0.0442878	0.0493677	0.0631245	0.0888523	0.128071	0.17167	0.211279	0.243198	0.266692	0.281312	0.286484	0.282722	0.271069	0.252153	0.225884	0.197964	0.174908	0.161356	0.153156	0.142043	0.127893	0.114426	0.103165	0.0940516	0.0889144	0.0879676	0.0892723	0.0917524	0.0926173	0.0922273
-1	1	1	1	0.160201	0.11459	0.0915257	0.0993829	0.116245	0.118015	0.118958	0.116068	0.116274	0.107005	0.0960716	0.0843416	0.0727346	0.065688	0.0641591	0.063396	0.0628094	0.0687044	0.0857028	0.116478	0.159518	0.210235	0.257871	0.295655	0.320631	0.336341	0.343388	0.339952	0.325604	0.302008	0.269705	0.235258	0.208643	0.191019	0.179428	0.168951	0.154366	0.138051	0.123255	0.114345	0.110174	0.108603	0.108814	0.110929	0.111001	0.109483
-1	1	1	1	0.080807	0.0698292	0.068414	0.0759695	0.0943658	0.0978553	0.113588	0.117103	0.118631	0.112244	0.103451	0.0919427	0.0799672	0.0714012	0.0643757	0.0587108	0.0550645	0.060157	0.0783658	0.106343	0.145041	0.188502	0.228842	0.26133	0.286514	0.306032	0.321038	0.329263	0.327243	0.317672	0.299204	0.275818	0.253367	0.23457	0.218002	0.198461	0.17376	0.14806	0.1264	0.11189	0.105522	0.105618	0.107778	0.110922	0.112699	0.113814
-1	1	1	1	0.100707	0.0751105	0.0647914	0.0872766	0.109523	0.115107	0.121624	0.120383	0.120913	0.112079	0.0986164	0.0844838	0.0739452	0.0664029	0.0626024	0.0598707	0.0594339	0.0654362	0.0842737	0.116005	0.160781	0.212191	0.259671	0.296135	0.320203	0.338589	0.350191	0.352564	0.34539	0.329323	0.306532	0.279405	0.255939	0.238904	0.225226	0.208694	0.186973	0.162686	0.141002	0.126361	0.116985	0.113459	0.11396	0.116396	0.117422	0.116426
-1	1	1	1	0.1069	0.0624725	0.0427922	0.0644447	0.0800471	0.0940802	0.106812	0.103719	0.105747	0.0987772	0.0858041	0.07292	0.0615227	0.0523017	0.0444367	0.0388127	0.0381727	0.0458624	0.065496	0.0960804	0.135814	0.17788	0.217081	0.247854	0.268493	0.283319	0.291486	0.292107	0.284145	0.268949	0.247576	0.226116	0.21068	0.200627	0.189658	0.17495	0.156735	0.136314	0.118107	0.105806	0.0981871	0.0955366	0.0956664	0.096884	0.0964712	0.0960558
-1	1	1	1	0.107152	0.0645969	0.0477179	0.0899788	0.128838	0.154632	0.172892	0.166542	0.164307	0.148981	0.122707	0.0980764	0.0793881	0.0661406	0.0581232	0.0568836	0.0632677	0.0781079	0.104217	0.145358	0.203092	0.264607	0.319836	0.361125	0.388402	0.413544	0.436803	0.45378	0.460458	0.457868	0.443715	0.41858	0.394139	0.377594	0.360869	0.333359	0.294544	0.250114	0.211501	0.186677	0.172443	0.167851	0.169103	0.173256	0.175029	0.174418
-1	1	1	1	0.143199	0.112459	0.0963067	0.109503	0.135408	0.142048	0.150219	0.144767	0.142018	0.13214	0.117768	0.102773	0.0881344	0.0782621	0.0737222	0.0714173	0.0704654	0.0772681	0.0963801	0.126097	0.167561	0.215113	0.259067	0.297	0.329566	0.353644	0.370236	0.379252	0.375577	0.363819	0.345573	0.322243	0.299489	0.280931	0.26366	0.243148	0.217277	0.19175	0.170648	0.152816	0.142382	0.137216	0.133318	0.135244	0.137709	0.137028
-1	1	1	1	0.131231	0.121399	0.123075	0.132416	0.168545	0.172115	0.183546	0.175455	0.169313	0.154141	0.136955	0.116427	0.0939964	0.0814042	0.0766664	0.0729527	0.0738377	0.0857522	0.11222	0.14921	0.200221	0.258089	0.309757	0.352638	0.387401	0.415868	0.434383	0.447306	0.452717	0.450475	0.440074	0.420899	0.397542	0.376775	0.356704	0.329187	0.290657	0.250386	0.215419	0.187591	0.167225	0.161164	0.162612	0.168093	0.172016	0.173349
-1	1	1	1	0.0760391	0.0635271	0.0563626	0.0839195	0.109916	0.111242	0.117608	0.114239	0.112151	0.104255	0.0915774	0.0777094	0.0668021	0.0612525	0.0584929	0.0538303	0.0513403	0.0559239	0.0747438	0.121141	0.190738	0.266784	0.333911	0.386262	0.422681	0.443719	0.44619	0.430839	0.399132	0.353095	0.2975	0.240693	0.198646	0.181388	0.173468	0.161157	0.143354	0.125769	0.111249	0.101515	0.0953408	0.0937651	0.0951044	0.0973415	0.0984987	0.0978192
-1	1	1	1	0.0570363	0.0529928	0.0603795	0.0895613	0.113279	0.117384	0.119048	0.112629	0.107369	0.0960534	0.0824707	0.0696635	0.0602837	0.0541879	0.0518583	0.0517315	0.0525833	0.0579211	0.0782765	0.122651	0.191548	0.269174	0.338313	0.392204	0.428259	0.446073	0.446377	0.430348	0.397367	0.350156	0.292549	0.233727	0.190589	0.17059	0.162491	0.152213	0.136482	0.119135	0.104047	0.0932905	0.088306	0.0883908	0.0903697	0.0929697	0.0937805	0.0928319
-1	1	1	1	0.0714131	0.0448182	0.0310607	0.0543476	0.0746566	0.0864336	0.092915	0.0880059	0.0872643	0.0802417	0.0692309	0.0577479	0.0484501	0.0431548	0.040347	0.0402333	0.0412624	0.0456765	0.0597032	0.0990615	0.1658	0.241692	0.30868	0.359809	0.394565	0.413263	0.415213	0.400989	0.368965	0.321623	0.263158	0.20319	0.158682	0.140863	0.136378	0.128538	0.113424	0.0971104	0.0846307	0.076594	0.0729766	0.0729736	0.0742649	0.0760469	0.0771586	0.0770068
-1	1	1	1	0.091615	0.0693973	0.0550421	0.0868931	0.124551	0.134132	0.145993	0.142986	0.14166	0.130593	0.113723	0.0933113	0.076943	0.0712473	0.068518	0.066722	0.0660099	0.0738427	0.103266	0.158042	0.234962	0.317388	0.391285	0.451654	0.493778	0.517689	0.523979	0.513406	0.484994	0.441076	0.38478	0.327974	0.284678	0.260097	0.243738	0.223009	0.198433	0.174403	0.150937	0.133707	0.125397	0.125282	0.129619	0.135585	0.139097	0.139874
-1	1	1	1	0.0737019	0.0531313	0.0464854	0.0726803	0.0922685	0.0946651	0.0989123	0.0955486	0.0941157	0.0855348	0.0730289	0.0608744	0.0521531	0.048877	0.0470018	0.0437712	0.0405392	0.0425354	0.0588554	0.101375	0.164534	0.233784	0.29497	0.343092	0.376563	0.394238	0.397822	0.387108	0.35976	0.318397	0.268588	0.218781	0.183569	0.169523	0.160864	0.149074	0.133063	0.116396	0.102131	0.0914577	0.0868404	0.0865649	0.0879274	0.0905311	0.0920343	0.091426
-1	1	1	1	0.110588	0.0785287	0.0583016	0.0752547	0.102187	0.107047	0.108938	0.103928	0.103733	0.0968268	0.0857836	0.0722487	0.0603679	0.0555433	0.055702	0.0548474	0.054342	0.0592439	0.078299	0.120282	0.181015	0.247114	0.306756	0.352812	0.382842	0.399316	0.402253	0.392478	0.367853	0.329746	0.284205	0.239209	0.206413	0.191271	0.180953	0.166918	0.148746	0.128863	0.111609	0.100276	0.0936335	0.0920749	0.0931878	0.0957735	0.0979578	0.0985015
-1	1	1	1	0.0738203	0.0617993	0.0573296	0.0726779	0.087571	0.0883717	0.0972151	0.0956869	0.0939733	0.0870886	0.0779448	0.0676196	0.058606	0.0528827	0.0500048	0.0460352	0.042174	0.0437581	0.0585581	0.0942444	0.150421	0.212012	0.267353	0.311351	0.342865	0.362281	0.368534	0.364247	0.347383	0.31697	0.275726	0.232089	0.198471	0.181627	0.171289	0.156438	0.13697	0.116691	0.0996453	0.0873004	0.0805608	0.0807098	0.0829215	0.0855497	0.08698	0.0870817
-1	1	1	1	0.0714061	0.0634253	0.0651852	0.082056	0.0905234	0.0947697	0.0999405	0.095283	0.0929068	0.0857048	0.0760428	0.0671141	0.0594734	0.0531287	0.0471694	0.0431485	0.0423428	0.0469415	0.0630538	0.103158	0.165824	0.235177	0.297565	0.346845	0.380131	0.397674	0.400309	0.390176	0.365118	0.328625	0.283782	0.236512	0.201309	0.186816	0.178904	0.165983	0.148239	0.128265	0.109185	0.0947877	0.08651	0.0844003	0.0845735	0.0869435	0.0882656	0.0873332
-1	1	1	1	0.0787486	0.0511991	0.0400004	0.0540545	0.070284	0.0748729	0.082393	0.0818578	0.0835794	0.0784204	0.069095	0.0603444	0.0529175	0.0488985	0.0467748	0.0421859	0.0396932	0.0445758	0.0613879	0.100093	0.158379	0.221953	0.27884	0.322117	0.350718	0.36867	0.374548	0.367497	0.347034	0.313992	0.272338	0.229657	0.198374	0.18401	0.174603	0.160992	0.142003	0.120843	0.102738	0.0908854	0.0836912	0.0823943	0.0845968	0.0869727	0.0879725	0.0883732
-1	1	1	1	0.139222	0.0815875	0.047653	0.0946517	0.120092	0.123883	0.145596	0.153292	0.160406	0.155551	0.142794	0.129795	0.12141	0.115553	0.11033	0.105252	0.100763	0.110782	0.147849	0.219567	0.323657	0.435037	0.532454	0.606298	0.654198	0.675064	0.665961	0.62829	0.564824	0.480356	0.383809	0.294134	0.227092	0.195534	0.183697	0.171395	0.154536	0.137128	0.123538	0.114501	0.10947	0.106874	0.106702	0.108871	0.108979	0.107227
-1	1	1	1	0.0786899	0.0638335	0.0678784	0.0825059	0.0946023	0.0980648	0.105151	0.103728	0.104386	0.0967151	0.0891241	0.0845767	0.0801512	0.0782103	0.0795847	0.0807857	0.0832123	0.0950109	0.128364	0.192617	0.284216	0.385269	0.474988	0.542305	0.585179	0.602595	0.59217	0.555369	0.494675	0.413507	0.32321	0.240295	0.181348	0.152584	0.140701	0.131054	0.117955	0.104084	0.0927443	0.0842773	0.0793684	0.0776016	0.0771541	0.0774938	0.0771367	0.0761059
-1	1	1	1	0.0427912	0.0282853	0.029365	0.0556	0.0765365	0.0745489	0.0779732	0.0810846	0.0831992	0.0780667	0.0706118	0.0654926	0.0623819	0.0623684	0.0638505	0.0627742	0.0620288	0.0699191	0.0963033	0.152478	0.234168	0.319991	0.393253	0.449575	0.486593	0.501645	0.491704	0.458577	0.404544	0.334949	0.259274	0.189163	0.138684	0.11603	0.107632	0.0977966	0.0856761	0.0760402	0.0689229	0.0637085	0.0601893	0.0593962	0.0601201	0.0611208	0.0611546	0.0600809
-1	1	1	1	0.100046	0.0526125	0.0299697	0.0611222	0.0788661	0.0772891	0.0804656	0.0823503	0.0879063	0.0841564	0.0767787	0.0702751	0.0666821	0.0675321	0.0684723	0.0658175	0.0613624	0.0657587	0.0877849	0.137554	0.212837	0.294835	0.36918	0.426739	0.462195	0.478949	0.475745	0.451679	0.407848	0.346608	0.275916	0.211531	0.165508	0.142391	0.133067	0.122207	0.107784	0.0920278	0.0773816	0.0682261	0.0631423	0.0602826	0.0592554	0.0597929	0.0601818	0.0605532
-1	1	1	1	0.0522449	0.0471677	0.0522932	0.0718991	0.0837611	0.0888129	0.0950356	0.0963463	0.0960896	0.0895439	0.0819215	0.0754803	0.0714265	0.0698209	0.0702975	0.0699628	0.0688716	0.0776742	0.108466	0.168375	0.249713	0.336273	0.412768	0.470665	0.508046	0.525273	0.521523	0.496281	0.448205	0.381245	0.30562	0.237115	0.189782	0.165763	0.151759	0.138436	0.122332	0.105047	0.090725	0.0818227	0.0772759	0.0754	0.0742276	0.0742701	0.0738402	0.0726645
-1	1	1	1	0.129709	0.107153	0.0905855	0.086535	0.0820846	0.0857587	0.0972058	0.0996681	0.102278	0.100786	0.0985224	0.0940934	0.0885298	0.08314	0.0768679	0.0743719	0.0759664	0.0849589	0.111024	0.166065	0.249555	0.343273	0.428084	0.492805	0.533837	0.551731	0.546921	0.520707	0.472342	0.406114	0.329129	0.253506	0.197575	0.170043	0.158023	0.146602	0.13008	0.111527	0.0952916	0.0834032	0.077278	0.0754097	0.0748597	0.0756505	0.0766585	0.0769648
-1	1	-1	1	0.0472	0.0339	0.0309	0.032	0.0405	0.0446	0.0509	0.0519	0.0531	0.0501	0.045	0.0397	0.0327	0.026	0.0215	0.0185	0.0165	0.0177	0.023	0.0289	0.0347	0.0424	0.0522	0.0625	0.0731	0.09	0.114	0.146	0.183	0.217	0.245	0.264	0.27	0.265	0.249	0.224	0.192	0.156	0.122	0.0961	0.08	0.0739	0.0737	0.0749	0.0759	0.0782
-1	1	-1	1	0.0919	0.0717	0.0613	0.0611	0.0758	0.0787	0.0817	0.0785	0.0774	0.0702	0.0614	0.0526	0.0424	0.0354	0.032	0.0281	0.0252	0.0271	0.0338	0.0417	0.0501	0.0598	0.0712	0.0838	0.0992	0.123	0.154	0.195	0.24	0.281	0.314	0.336	0.344	0.338	0.317	0.285	0.245	0.201	0.16	0.129	0.11	0.105	0.105	0.108	0.111	0.114
-1	1	-1	1	0.0335	0.0434	0.0543	0.0604	0.0634	0.0593	0.0549	0.051	0.0462	0.0402	0.0341	0.0291	0.0247	0.0217	0.0193	0.0163	0.0144	0.0154	0.0185	0.024	0.0317	0.0416	0.0532	0.0654	0.0785	0.0967	0.121	0.153	0.189	0.225	0.254	0.273	0.281	0.277	0.261	0.236	0.203	0.165	0.129	0.102	0.0848	0.0783	0.0787	0.0814	0.0832	0.0856
-1	1	-1	1	0.153	0.111	0.0741	0.0628	0.0879	0.1	0.108	0.103	0.102	0.0958	0.0842	0.0683	0.0496	0.0357	0.0283	0.0236	0.0223	0.0261	0.0347	0.0431	0.052	0.0623	0.074	0.0856	0.101	0.123	0.15	0.184	0.222	0.257	0.286	0.305	0.311	0.306	0.287	0.26	0.229	0.193	0.163	0.14	0.127	0.126	0.129	0.134	0.138	0.14
-1	1	-1	1	0.0489	0.059	0.0674	0.0758	0.0985	0.111	0.119	0.114	0.108	0.0971	0.0827	0.0662	0.0494	0.0359	0.0271	0.0217	0.0201	0.0235	0.0322	0.0421	0.053	0.0659	0.0807	0.0965	0.113	0.134	0.16	0.193	0.23	0.265	0.292	0.309	0.315	0.309	0.292	0.268	0.237	0.202	0.168	0.143	0.127	0.123	0.126	0.13	0.131	0.133
-1	1	-1	1	0.164	0.117	0.0936	0.12	0.15	0.158	0.162	0.156	0.151	0.135	0.112	0.0894	0.0695	0.0548	0.0464	0.0392	0.0352	0.0381	0.0476	0.063	0.0796	0.0942	0.11	0.129	0.151	0.181	0.216	0.26	0.309	0.354	0.389	0.411	0.418	0.412	0.389	0.353	0.311	0.267	0.228	0.197	0.178	0.175	0.181	0.187	0.192	0.195
-1	1	-1	1	0.0648	0.0767	0.0892	0.0932	0.117	0.134	0.139	0.131	0.123	0.11	0.0933	0.0761	0.0574	0.0415	0.0323	0.0287	0.0295	0.0342	0.0427	0.0518	0.0607	0.0703	0.0821	0.0946	0.111	0.135	0.167	0.206	0.247	0.285	0.316	0.335	0.342	0.336	0.317	0.288	0.252	0.214	0.181	0.16	0.151	0.151	0.155	0.16	0.164	0.167
-1	1	-1	1	0.0897	0.0658	0.0537	0.0713	0.112	0.139	0.146	0.138	0.134	0.12	0.1	0.0779	0.0559	0.0384	0.0291	0.026	0.0269	0.0333	0.0422	0.052	0.0631	0.0746	0.0879	0.101	0.119	0.143	0.173	0.21	0.248	0.285	0.316	0.337	0.345	0.342	0.325	0.298	0.265	0.228	0.197	0.173	0.16	0.157	0.161	0.167	0.173	0.176
-1	1	-1	1	0.0827	0.106	0.12	0.129	0.16	0.166	0.173	0.167	0.157	0.142	0.125	0.104	0.0817	0.0654	0.0556	0.0491	0.0448	0.0453	0.0541	0.0635	0.0732	0.0843	0.0963	0.111	0.13	0.153	0.179	0.215	0.254	0.292	0.324	0.344	0.351	0.346	0.329	0.303	0.271	0.235	0.203	0.177	0.163	0.161	0.166	0.172	0.177	0.18
-1	1	-1	1	0.215	0.145	0.105	0.151	0.185	0.194	0.2	0.19	0.187	0.168	0.14	0.112	0.0904	0.0765	0.0646	0.0578	0.0559	0.0594	0.0711	0.0842	0.0971	0.11	0.124	0.138	0.156	0.18	0.204	0.232	0.264	0.294	0.317	0.33	0.334	0.328	0.313	0.292	0.265	0.236	0.211	0.193	0.181	0.18	0.185	0.189	0.192	0.193
-1	1	-1	1	0.142	0.116	0.108	0.129	0.161	0.167	0.181	0.179	0.175	0.16	0.137	0.115	0.094	0.0752	0.0625	0.0519	0.0452	0.0494	0.0626	0.0753	0.0878	0.1	0.113	0.126	0.144	0.168	0.194	0.222	0.252	0.28	0.302	0.315	0.319	0.313	0.298	0.276	0.251	0.224	0.203	0.188	0.179	0.177	0.179	0.182	0.183	0.182
-1	1	-1	1	0.13	0.142	0.157	0.157	0.168	0.166	0.175	0.171	0.161	0.145	0.128	0.112	0.0944	0.0775	0.065	0.0566	0.0521	0.0543	0.0665	0.0812	0.0954	0.108	0.12	0.134	0.15	0.172	0.197	0.226	0.256	0.287	0.312	0.326	0.333	0.331	0.318	0.295	0.268	0.239	0.214	0.197	0.186	0.183	0.185	0.19	0.192	0.191
-1	1	-1	1	0.0805	0.0989	0.116	0.141	0.18	0.193	0.209	0.206	0.197	0.181	0.156	0.128	0.1	0.0775	0.0626	0.0533	0.0463	0.0455	0.059	0.0734	0.0866	0.0987	0.112	0.127	0.141	0.16	0.184	0.213	0.244	0.271	0.292	0.305	0.31	0.305	0.291	0.271	0.247	0.222	0.199	0.184	0.177	0.178	0.182	0.187	0.19	0.192
-1	1	-1	1	0.157	0.132	0.12	0.145	0.174	0.184	0.19	0.182	0.176	0.16	0.138	0.113	0.0923	0.0751	0.0637	0.0564	0.0528	0.0563	0.0676	0.08	0.0929	0.108	0.124	0.14	0.16	0.184	0.21	0.238	0.267	0.295	0.317	0.33	0.334	0.327	0.312	0.29	0.265	0.24	0.219	0.203	0.194	0.194	0.2	0.207	0.212	0.214
-1	1	-1	1	0.161	0.141	0.129	0.176	0.233	0.259	0.272	0.265	0.258	0.238	0.204	0.167	0.136	0.113	0.0974	0.0885	0.0833	0.0874	0.103	0.121	0.14	0.161	0.181	0.201	0.225	0.254	0.288	0.324	0.356	0.384	0.408	0.423	0.428	0.421	0.405	0.379	0.349	0.319	0.293	0.277	0.267	0.265	0.27	0.278	0.283	0.284
-1	-1	1	-1	0.0209	0.0288	0.0373	0.0339	0.0333	0.0369	0.041	0.0441	0.0469	0.0516	0.0606	0.0719	0.0832	0.0969	0.112	0.125	0.128	0.144	0.209	0.371	0.623	0.907	1.16	1.34	1.45	1.47	1.41	1.27	1.06	0.795	0.5	0.241	0.0657	0.00139	0.00588	0.0227	0.0261	0.0243	0.021	0.0166	0.0136	0.011	0.00826	0.00555	0.00347	0.00256
-1	-1	1	-1	0.0371	0.0339	0.0309	0.0352	0.0418	0.0462	0.0505	0.0512	0.0538	0.0586	0.0634	0.0688	0.0767	0.0877	0.0983	0.109	0.117	0.135	0.193	0.347	0.592	0.87	1.11	1.3	1.4	1.43	1.37	1.24	1.04	0.781	0.501	0.246	0.0685	0.00367	0.00791	0.023	0.0243	0.0218	0.0194	0.0162	0.0136	0.0108	0.00812	0.00628	0.00512	0.00443
-1	-1	1	-1	0.0488	0.0465	0.0487	0.0484	0.0535	0.0573	0.0609	0.0627	0.0653	0.0712	0.0782	0.0876	0.0977	0.112	0.131	0.156	0.169	0.194	0.276	0.449	0.691	0.959	1.2	1.38	1.48	1.5	1.43	1.29	1.08	0.82	0.53	0.277	0.109	0.0372	0.0227	0.0295	0.029	0.0268	0.0254	0.0216	0.0175	0.0134	0.0101	0.00732	0.00482	0.00331
-1	-1	1	1	0.0421	0.0284	0.0185	0.0122	0.0123	0.00998	0.019	0.0261	0.0313	0.0338	0.035	0.036	0.0352	0.0333	0.0312	0.028	0.0233	0.0202	0.0315	0.078	0.149	0.225	0.292	0.342	0.378	0.398	0.403	0.394	0.371	0.333	0.283	0.231	0.193	0.183	0.175	0.158	0.132	0.103	0.0765	0.0543	0.0383	0.0299	0.0262	0.0252	0.0252	0.0261
-1	-1	1	1	0.0393	0.0308	0.0213	0.015	0.0134	0.0123	0.015	0.0189	0.0214	0.0235	0.0246	0.0254	0.0258	0.0261	0.0263	0.0259	0.024	0.0219	0.0293	0.0675	0.131	0.2	0.263	0.312	0.346	0.365	0.37	0.363	0.344	0.311	0.264	0.215	0.178	0.165	0.158	0.144	0.123	0.0975	0.0717	0.0507	0.0358	0.0288	0.0263	0.0253	0.0242	0.0243
-1	-1	1	1	0.0521	0.0435	0.0355	0.0296	0.0283	0.0221	0.0231	0.0241	0.0249	0.0261	0.0275	0.0287	0.0293	0.0317	0.0337	0.0329	0.0285	0.028	0.0444	0.0938	0.171	0.257	0.334	0.393	0.433	0.457	0.462	0.452	0.425	0.381	0.323	0.265	0.224	0.207	0.197	0.179	0.151	0.118	0.0883	0.0639	0.0465	0.0385	0.0357	0.0345	0.0331	0.0337
-1	-1	1	1	0.0504	0.0283	0.0128	0.0118	0.014	0.0148	0.0171	0.0186	0.0225	0.0251	0.0268	0.0292	0.0319	0.0358	0.0396	0.0408	0.0375	0.0332	0.0447	0.118	0.241	0.377	0.497	0.589	0.649	0.675	0.667	0.627	0.554	0.451	0.328	0.209	0.127	0.106	0.105	0.0997	0.0845	0.0663	0.0493	0.0357	0.0264	0.0217	0.0197	0.0185	0.0179	0.0182
-1	-1	1	1	0.0446	0.035	0.0242	0.0144	0.0112	0.0116	0.0142	0.0172	0.0211	0.0253	0.0279	0.0309	0.0337	0.0358	0.0357	0.0341	0.0324	0.0311	0.0471	0.124	0.246	0.38	0.496	0.583	0.638	0.66	0.649	0.606	0.531	0.431	0.316	0.204	0.129	0.113	0.112	0.105	0.0896	0.0701	0.0515	0.0368	0.027	0.0219	0.0192	0.0183	0.0181	0.0189
-1	-1	1	1	0.0713	0.0419	0.0215	0.0158	0.0162	0.0132	0.0199	0.0261	0.0329	0.0367	0.0399	0.0431	0.0449	0.046	0.0457	0.041	0.0337	0.0288	0.0495	0.137	0.268	0.409	0.534	0.629	0.687	0.709	0.693	0.644	0.562	0.45	0.324	0.205	0.128	0.112	0.111	0.104	0.091	0.0729	0.0538	0.0384	0.0281	0.0232	0.0207	0.0192	0.0183	0.0186
-1	-1	1	1	0.0541	0.0363	0.0208	0.0131	0.0112	0.00817	0.0129	0.0183	0.024	0.0287	0.0322	0.0355	0.0381	0.0412	0.0434	0.0416	0.0324	0.0218	0.0429	0.146	0.305	0.476	0.623	0.73	0.795	0.817	0.794	0.731	0.626	0.486	0.326	0.177	0.0872	0.0739	0.0806	0.0806	0.0688	0.0525	0.0378	0.0257	0.0173	0.0135	0.0112	0.00971	0.00892	0.00895
-1	-1	1	1	0.04	0.043	0.0463	0.0346	0.0351	0.0283	0.0302	0.0286	0.0297	0.0298	0.0318	0.0351	0.038	0.0414	0.0438	0.0452	0.0432	0.0325	0.0397	0.142	0.305	0.478	0.629	0.744	0.816	0.842	0.822	0.759	0.653	0.513	0.35	0.188	0.0827	0.0731	0.0798	0.0767	0.0663	0.054	0.0403	0.0271	0.0188	0.0154	0.0131	0.0117	0.0115	0.0121
-1	-1	1	1	0.0986	0.0543	0.0227	0.0139	0.0124	0.00953	0.018	0.0251	0.0346	0.0403	0.0434	0.0464	0.0485	0.0516	0.0543	0.0526	0.0463	0.0451	0.0738	0.194	0.381	0.578	0.746	0.871	0.946	0.971	0.944	0.869	0.748	0.586	0.404	0.236	0.126	0.106	0.111	0.106	0.0889	0.0696	0.0521	0.0369	0.0265	0.0205	0.017	0.0152	0.0145	0.0149
-1	-1	1	1	0.0789	0.0457	0.0226	0.0173	0.0165	0.0133	0.0175	0.0237	0.0314	0.0364	0.0401	0.0445	0.0485	0.0533	0.057	0.0567	0.0498	0.0419	0.0651	0.189	0.388	0.601	0.785	0.92	1	1.03	0.994	0.904	0.762	0.577	0.368	0.174	0.0482	0.0258	0.038	0.043	0.0372	0.0287	0.0211	0.014	0.00869	0.0055	0.00349	0.00244	0.00185	0.00184
-1	-1	1	1	0.105	0.0637	0.0317	0.0221	0.0251	0.0214	0.0292	0.0344	0.0425	0.0485	0.0527	0.0565	0.0583	0.0612	0.0647	0.065	0.0611	0.054	0.0787	0.209	0.422	0.658	0.865	1.02	1.12	1.17	1.11	1.02	0.864	0.664	0.437	0.218	0.0725	0.0398	0.0496	0.0554	0.0494	0.0393	0.0294	0.0202	0.0139	0.0103	0.0078	0.00567	0.00398	0.00358
-1	-1	1	1	0.0361	0.0221	0.0142	0.0146	0.0171	0.0171	0.0247	0.0299	0.0352	0.0382	0.04	0.043	0.0458	0.0483	0.0491	0.0456	0.0361	0.0282	0.0496	0.177	0.388	0.614	0.808	0.952	1.04	1.14	1.03	0.937	0.787	0.591	0.372	0.168	0.0342	0.0138	0.0319	0.0399	0.0355	0.0281	0.0209	0.0143	0.00982	0.0074	0.00576	0.00453	0.0036	0.0033
-1	-1	1	1	0.109	0.0676	0.0392	0.0275	0.0256	0.0205	0.0313	0.0432	0.0544	0.0622	0.069	0.078	0.0867	0.0932	0.0978	0.098	0.0867	0.0599	0.0811	0.262	0.566	0.898	1.18	1.39	1.52	2.24	1.51	1.38	1.16	0.871	0.543	0.228	0.0299	-0.000866	0.0273	0.0452	0.0425	0.0346	0.0277	0.0209	0.015	0.0105	0.0072	0.00506	0.00387	0.00359
-1	-1	1	1	0.0467	0.0324	0.021	0.0182	0.0219	0.0229	0.0322	0.0421	0.0501	0.0555	0.0578	0.0614	0.0651	0.0707	0.0761	0.0779	0.0693	0.0537	0.0663	0.202	0.455	0.734	0.975	1.15	1.27	1.65	1.27	1.16	0.985	0.75	0.478	0.216	0.0355	-0.00346	0.0237	0.0378	0.0342	0.0279	0.0219	0.016	0.0113	0.00813	0.00625	0.00505	0.00374	0.00309
-1	-1	1	1	0.0676	0.042	0.0243	0.0232	0.0279	0.027	0.0334	0.0405	0.0497	0.0559	0.0604	0.0658	0.071	0.0791	0.0856	0.0826	0.0723	0.0656	0.0954	0.26	0.528	0.82	1.07	1.26	1.37	1.78	1.36	1.23	1.04	0.775	0.487	0.221	0.0441	0.0107	0.0278	0.0385	0.0338	0.0263	0.0215	0.0159	0.0117	0.00902	0.00658	0.00454	0.00328	0.00291
-1	-1	-1	1	0.0203	0.00853	0.00189	0.00153	0.00224	0.00322	0.00435	0.00481	0.006	0.00546	0.0049	0.00477	0.00421	0.00329	0.00281	0.00417	0.0054	0.00692	0.0106	0.0153	0.0208	0.0275	0.035	0.0445	0.0551	0.0693	0.0895	0.118	0.151	0.184	0.211	0.23	0.239	0.236	0.223	0.2	0.17	0.137	0.103	0.0749	0.0559	0.0464	0.0421	0.0404	0.0399	0.0414
-1	-1	-1	1	0.00569	0.0036	0.00206	0.00488	0.00829	0.00775	0.01	0.0105	0.0104	0.0094	0.00797	0.00672	0.00567	0.00529	0.00545	0.00651	0.00736	0.00888	0.0137	0.0188	0.0239	0.0303	0.0383	0.0476	0.0575	0.071	0.0896	0.116	0.147	0.178	0.204	0.223	0.231	0.229	0.217	0.196	0.169	0.137	0.104	0.0766	0.0572	0.047	0.0422	0.0407	0.041	0.0432
-1	-1	-1	1	0.0327	0.0217	0.0141	0.00942	0.00971	0.00994	0.00812	0.00563	0.00567	0.00537	0.00506	0.00505	0.005	0.00543	0.00682	0.01	0.0145	0.0194	0.0238	0.0292	0.0359	0.0442	0.0544	0.0656	0.0769	0.0925	0.114	0.145	0.182	0.219	0.249	0.269	0.276	0.273	0.258	0.233	0.2	0.162	0.124	0.0914	0.0689	0.0583	0.0535	0.0511	0.05	0.0518
independent test datset
HMX	RDX	TATB	TNT	spectrum
1	1	-1	-1	0.0804	0.0868	0.105	0.157	0.218	0.249	0.271	0.263	0.256	0.235	0.202	0.164	0.126	0.101	0.0951	0.107	0.129	0.159	0.192	0.214	0.227	0.233	0.229	0.218	0.203	0.186	0.17	0.167	0.176	0.195	0.21	0.219	0.221	0.215	0.205	0.19	0.175	0.16	0.148	0.139	0.134	0.136	0.143	0.15	0.153	0.155
1	1	-1	-1	0.0651	0.0833	0.097	0.105	0.141	0.178	0.207	0.21	0.208	0.196	0.175	0.145	0.111	0.0868	0.0821	0.0989	0.128	0.16	0.193	0.217	0.231	0.236	0.23	0.215	0.192	0.169	0.15	0.144	0.152	0.169	0.184	0.192	0.194	0.19	0.181	0.169	0.155	0.141	0.129	0.121	0.118	0.119	0.123	0.129	0.133	0.133
1	1	-1	-1	0.131	0.119	0.113	0.15	0.182	0.219	0.249	0.248	0.245	0.23	0.205	0.172	0.138	0.112	0.0983	0.106	0.132	0.166	0.2	0.228	0.245	0.251	0.25	0.241	0.226	0.207	0.189	0.183	0.191	0.208	0.227	0.238	0.242	0.24	0.232	0.22	0.205	0.191	0.176	0.165	0.159	0.159	0.163	0.168	0.171	0.172
1	1	-1	-1	0.038	0.0607	0.0859	0.0956	0.119	0.162	0.214	0.239	0.249	0.248	0.237	0.214	0.18	0.146	0.136	0.156	0.195	0.243	0.285	0.315	0.332	0.33	0.312	0.281	0.237	0.186	0.138	0.107	0.105	0.118	0.126	0.128	0.124	0.117	0.108	0.0988	0.0888	0.08	0.0744	0.0716	0.0714	0.0742	0.0786	0.0831	0.0856	0.0864
1	1	-1	-1	0.0277	0.0529	0.0698	0.0744	0.0997	0.124	0.158	0.168	0.17	0.165	0.154	0.132	0.102	0.0799	0.0804	0.101	0.132	0.172	0.211	0.237	0.249	0.248	0.235	0.21	0.174	0.13	0.089	0.0644	0.0603	0.066	0.0705	0.0724	0.0716	0.0679	0.0621	0.0568	0.0518	0.0466	0.0413	0.037	0.0352	0.0358	0.037	0.0384	0.0393	0.0393
1	1	-1	-1	0.0806	0.0744	0.0804	0.114	0.149	0.196	0.251	0.266	0.273	0.264	0.241	0.211	0.173	0.142	0.137	0.162	0.203	0.254	0.301	0.329	0.342	0.337	0.316	0.279	0.231	0.178	0.128	0.0996	0.0975	0.108	0.116	0.119	0.118	0.116	0.11	0.102	0.0931	0.0846	0.0768	0.0708	0.0678	0.0676	0.069	0.0715	0.0732	0.0737
1	1	1	-1	0.0734267	0.0792523	0.0843567	0.099506	0.12293	0.152253	0.177771	0.178562	0.178037	0.172051	0.157413	0.140089	0.120194	0.104449	0.105167	0.118724	0.137965	0.168208	0.213992	0.280159	0.362579	0.444895	0.511504	0.553916	0.570764	0.564493	0.537294	0.497511	0.448467	0.38303	0.309112	0.243905	0.19592	0.17347	0.165308	0.156604	0.144017	0.131153	0.120452	0.114102	0.112826	0.113338	0.114457	0.116578	0.118889	0.118923
1	1	1	-1	0.0412654	0.0572996	0.0768079	0.106188	0.133293	0.157041	0.163262	0.162684	0.157272	0.147213	0.131776	0.112876	0.093659	0.0814814	0.0831888	0.100306	0.1208	0.147374	0.189699	0.252625	0.333406	0.412051	0.475833	0.52049	0.540296	0.533294	0.506385	0.468013	0.419772	0.358752	0.287211	0.223406	0.179508	0.155371	0.14353	0.132959	0.120883	0.109513	0.0998082	0.0926288	0.0899488	0.0901682	0.0910412	0.092074	0.0930161	0.0929326
1	1	1	-1	0.0116955	0.0510337	0.0916884	0.128971	0.158859	0.184905	0.195204	0.194366	0.186407	0.170781	0.152303	0.13183	0.112854	0.100452	0.100021	0.111299	0.130428	0.159222	0.198593	0.259023	0.341078	0.425251	0.494978	0.544564	0.569008	0.567128	0.543261	0.504639	0.451538	0.383958	0.31025	0.241191	0.18664	0.157374	0.146371	0.138476	0.1277	0.116414	0.1066	0.0988236	0.0955448	0.0961094	0.0971523	0.0991055	0.101605	0.101945
1	1	1	-1	0.115217	0.126808	0.142774	0.1627	0.182225	0.20561	0.231687	0.244721	0.247266	0.242316	0.227625	0.208044	0.185926	0.169627	0.171378	0.190503	0.221656	0.263835	0.30942	0.362557	0.420837	0.470765	0.502186	0.51042	0.496585	0.464875	0.422605	0.379143	0.340941	0.300535	0.256001	0.212847	0.177217	0.156676	0.147737	0.140958	0.130155	0.118748	0.111335	0.106568	0.104588	0.104544	0.104712	0.105258	0.105391	0.104103
1	1	1	-1	0.0547819	0.0706264	0.0843106	0.095846	0.114136	0.147325	0.179127	0.189545	0.192253	0.187997	0.176111	0.156145	0.131653	0.11348	0.109489	0.123892	0.152646	0.190237	0.230189	0.276549	0.325952	0.36651	0.391207	0.397748	0.384051	0.353932	0.316228	0.27912	0.247341	0.216555	0.180233	0.14531	0.120385	0.109101	0.103352	0.0977472	0.0904637	0.0825049	0.0756965	0.0717386	0.0701725	0.0699484	0.0706628	0.0717882	0.0729817	0.0732727
1	1	1	-1	0.0336224	0.0781603	0.114003	0.108769	0.134094	0.18646	0.225946	0.239527	0.243212	0.23891	0.227866	0.204627	0.17158	0.142626	0.137528	0.158507	0.196581	0.243116	0.295997	0.35899	0.421399	0.471028	0.50103	0.507511	0.488933	0.449759	0.399145	0.347878	0.305822	0.264278	0.217409	0.175718	0.146376	0.131966	0.123438	0.114899	0.105973	0.0975495	0.0901202	0.0840461	0.0807466	0.0803537	0.0809495	0.0816751	0.0821487	0.0819002
1	1	1	-1	0.0182779	0.0283402	0.0469244	0.0529027	0.0547915	0.07202	0.0915407	0.105017	0.110839	0.111543	0.109072	0.103708	0.0930566	0.0810745	0.0795358	0.0912948	0.115203	0.148529	0.189253	0.250357	0.325024	0.394303	0.445705	0.474019	0.474832	0.448344	0.401772	0.343115	0.280874	0.21404	0.146782	0.0868729	0.042726	0.0264471	0.024695	0.0242149	0.0229145	0.0209852	0.0183188	0.015859	0.014658	0.0140181	0.0133391	0.0128751	0.0125755	0.0122148
1	1	1	-1	0.0708273	0.109902	0.147465	0.146446	0.174706	0.218213	0.237881	0.253396	0.257109	0.257321	0.250115	0.239478	0.220717	0.200807	0.208488	0.244557	0.292965	0.343212	0.415603	0.522134	0.648866	0.7678	0.854332	0.901151	0.904993	0.865664	0.790096	0.691253	0.583846	0.464653	0.337016	0.222872	0.14653	0.107269	0.0942356	0.0867264	0.0757286	0.0674876	0.0614836	0.0568928	0.0551222	0.0542977	0.052611	0.0497966	0.0471469	0.0464424
1	1	1	-1	0.000468275	0.0222772	0.0458312	0.0613569	0.0727917	0.0929887	0.112003	0.122354	0.126136	0.125727	0.120601	0.113991	0.105275	0.0977438	0.100056	0.114175	0.137257	0.167873	0.207736	0.268419	0.347918	0.425338	0.484269	0.517677	0.523928	0.503736	0.460815	0.403236	0.337235	0.263533	0.185547	0.115437	0.0660144	0.0461247	0.044925	0.0454906	0.0428934	0.0396155	0.0370947	0.0340054	0.0316564	0.0304156	0.0290244	0.0279727	0.0277234	0.0278521
1	1	1	-1	0.0497718	0.0683086	0.0878392	0.105385	0.116555	0.139847	0.154169	0.15846	0.156882	0.150282	0.137334	0.121898	0.10653	0.0955286	0.0956045	0.10987	0.138263	0.172771	0.213402	0.270418	0.338869	0.402616	0.450915	0.477021	0.478011	0.458072	0.423536	0.380584	0.331451	0.277338	0.221941	0.168306	0.126821	0.108241	0.100933	0.0945361	0.0869112	0.0780378	0.0699485	0.0649852	0.0634832	0.0640961	0.0652637	0.0672102	0.0683565	0.0677641
1	1	1	-1	0.0481569	0.0630656	0.0780826	0.101143	0.133247	0.161486	0.188383	0.194102	0.19643	0.18867	0.173082	0.152017	0.12999	0.115957	0.116755	0.134424	0.161655	0.194237	0.236071	0.291124	0.357074	0.421761	0.468854	0.492176	0.492089	0.47257	0.438168	0.395277	0.34876	0.296621	0.235446	0.173889	0.129734	0.107983	0.099347	0.0931128	0.0843767	0.0763905	0.0705836	0.0681542	0.0688991	0.0710222	0.0730881	0.0748072	0.0755093	0.0746889
1	1	1	-1	0.0169605	0.0626089	0.0929356	0.0977441	0.11238	0.132823	0.15416	0.159754	0.159465	0.157005	0.14981	0.136454	0.120009	0.108606	0.11191	0.129545	0.158525	0.1952	0.240206	0.297586	0.366995	0.43579	0.487239	0.512683	0.512317	0.490565	0.452842	0.407673	0.359007	0.303513	0.243002	0.183804	0.140114	0.118436	0.110181	0.103691	0.0930759	0.0808275	0.0715607	0.0666379	0.0653544	0.0666195	0.0675808	0.0677392	0.0675884	0.0673192
1	1	-1	1	0.0268605	0.073838	0.099228	0.106449	0.132984	0.163534	0.185344	0.182281	0.173517	0.163497	0.148666	0.126469	0.100459	0.083652	0.0792319	0.0883204	0.10916	0.135386	0.162542	0.182373	0.196471	0.204544	0.205417	0.201843	0.194454	0.186118	0.182424	0.192886	0.217219	0.244336	0.266069	0.280403	0.286234	0.283041	0.271853	0.253462	0.228171	0.19956	0.171385	0.148846	0.134573	0.130093	0.130466	0.130242	0.129232	0.128901
1	1	-1	1	0.0183989	0.0344959	0.0470778	0.0586376	0.0923623	0.1126	0.113377	0.110044	0.105993	0.0988213	0.0868676	0.0706504	0.0534782	0.0425872	0.0431353	0.0544405	0.0702154	0.0860603	0.100996	0.115387	0.126796	0.133537	0.136823	0.136004	0.130227	0.123117	0.120479	0.125734	0.137412	0.152007	0.165558	0.174693	0.178204	0.176245	0.168509	0.156286	0.140725	0.122435	0.103879	0.0892524	0.0809596	0.0772657	0.0752483	0.0744261	0.0737098	0.0732216
1	1	-1	1	0.0239586	0.0294095	0.0368248	0.0474889	0.0673185	0.0913768	0.102809	0.105248	0.104318	0.0995507	0.0889169	0.0752223	0.0598145	0.0461819	0.0416197	0.0497297	0.0635119	0.0768884	0.0907086	0.10282	0.112123	0.116665	0.117128	0.114649	0.108503	0.102206	0.10013	0.106026	0.120213	0.136946	0.149216	0.1565	0.158063	0.154397	0.146944	0.135457	0.120845	0.104277	0.0884761	0.07733	0.0709979	0.06919	0.0687581	0.0681862	0.0672585	0.066266
1	1	-1	1	0.0185844	0.0371032	0.0548624	0.0835196	0.106843	0.133801	0.160671	0.170224	0.17145	0.166221	0.152075	0.131214	0.108397	0.0947741	0.100227	0.123377	0.156102	0.192662	0.225668	0.247969	0.259157	0.257221	0.24286	0.219308	0.188068	0.153955	0.127203	0.120348	0.133447	0.152706	0.168192	0.17917	0.182737	0.178646	0.169045	0.154186	0.134687	0.113502	0.0936158	0.0767152	0.0648557	0.058834	0.0558771	0.0553039	0.0558378	0.0572117
1	1	-1	1	0.0357413	0.0386625	0.0518314	0.0734699	0.0953743	0.128388	0.155031	0.165795	0.17018	0.163951	0.147901	0.127152	0.104435	0.0853929	0.08455	0.104517	0.135995	0.171082	0.202033	0.224012	0.236111	0.235695	0.223499	0.200968	0.169944	0.138165	0.112412	0.100495	0.108361	0.124374	0.13744	0.145831	0.147842	0.143726	0.135006	0.122926	0.108206	0.091591	0.0757562	0.0633558	0.0542975	0.0494802	0.0476627	0.0473532	0.0475525	0.0483062
1	1	-1	1	0.00049027	0.0221525	0.0463401	0.0582541	0.0789637	0.0968356	0.106687	0.106829	0.103434	0.0955682	0.0838894	0.0703553	0.0555954	0.046238	0.053062	0.0739521	0.1006	0.127851	0.149856	0.164214	0.170638	0.16798	0.157012	0.139765	0.117604	0.0943416	0.0769075	0.0723602	0.0802671	0.0937739	0.106373	0.114623	0.116726	0.113644	0.106578	0.0957868	0.0824165	0.0685245	0.055555	0.0449096	0.038171	0.0350566	0.0336388	0.0334001	0.0341511	0.0354546
1	1	-1	1	0.0318732	0.0759086	0.102275	0.121143	0.160252	0.189341	0.221329	0.2284	0.224143	0.21376	0.194471	0.165124	0.133001	0.110404	0.106048	0.117727	0.141434	0.175857	0.211059	0.236824	0.252373	0.255621	0.24666	0.229419	0.204626	0.175479	0.150207	0.13672	0.138975	0.15027	0.160974	0.16819	0.169575	0.165471	0.157382	0.146086	0.132604	0.118673	0.104729	0.0930885	0.0856743	0.0821786	0.0812813	0.0823219	0.0832682	0.0833113
1	1	-1	1	0.002106	0.0448945	0.111881	0.179797	0.219678	0.272226	0.327438	0.342595	0.342616	0.326968	0.3002	0.268649	0.230198	0.198939	0.198424	0.225652	0.269131	0.321538	0.372716	0.408553	0.425949	0.423579	0.406008	0.378174	0.339761	0.295059	0.25617	0.243002	0.257824	0.277674	0.290069	0.294492	0.290884	0.279905	0.262751	0.242866	0.220511	0.198527	0.180453	0.166551	0.157551	0.15432	0.154558	0.15611	0.155809	0.154231
1	1	-1	1	0.011385	0.0425769	0.0762808	0.112762	0.144295	0.191095	0.227476	0.238622	0.239624	0.229962	0.208473	0.181076	0.151616	0.127378	0.120939	0.133317	0.161796	0.197736	0.230249	0.254234	0.269021	0.271837	0.262926	0.243913	0.216571	0.185765	0.159503	0.147844	0.151147	0.160213	0.167439	0.171188	0.1699	0.163081	0.153056	0.141635	0.12824	0.114553	0.102686	0.0934873	0.0889157	0.0890492	0.0905928	0.0927355	0.0947194	0.096264
1	1	-1	1	0.123033	0.0636145	0.0254615	0.0528019	0.10025	0.152526	0.180508	0.184487	0.195802	0.192431	0.176402	0.149259	0.117043	0.0902102	0.0795089	0.0913453	0.121706	0.15768	0.188865	0.214467	0.230341	0.23615	0.233218	0.219928	0.19867	0.172991	0.152106	0.14422	0.152944	0.171834	0.189615	0.200784	0.205425	0.204564	0.19457	0.177481	0.155137	0.129918	0.107625	0.0912825	0.0835942	0.0818153	0.0814607	0.082559	0.0827948	0.0830105
1	1	-1	1	0.148591	0.112252	0.0846706	0.0858514	0.0979084	0.11943	0.149784	0.162669	0.173172	0.176595	0.169484	0.153558	0.131641	0.114339	0.109257	0.116507	0.140178	0.174012	0.204957	0.227798	0.240921	0.245598	0.240786	0.224831	0.200851	0.174407	0.153784	0.148449	0.160396	0.182054	0.203102	0.215611	0.219705	0.216734	0.205442	0.188693	0.165919	0.140064	0.118115	0.102665	0.0935812	0.0905415	0.0917643	0.0942334	0.0958043	0.097238
1	1	-1	1	0.0803029	0.0671457	0.0597637	0.0596099	0.0633332	0.0773958	0.115847	0.133629	0.14441	0.148086	0.143321	0.130845	0.111505	0.0941605	0.0858468	0.0879312	0.101645	0.124733	0.153071	0.173374	0.185611	0.190476	0.188009	0.176449	0.156862	0.136126	0.122368	0.12267	0.136303	0.15551	0.171124	0.179863	0.182343	0.178293	0.167847	0.152308	0.132702	0.110071	0.0894703	0.0753316	0.0676941	0.0651438	0.0649889	0.0652235	0.0649962	0.0651017
1	-1	1	-1	0.0592	0.051	0.0455	0.0543	0.0608	0.0646	0.0916	0.11	0.121	0.129	0.131	0.129	0.122	0.12	0.127	0.14	0.16	0.195	0.262	0.387	0.559	0.735	0.876	0.97	1.01	0.985	0.911	0.799	0.652	0.481	0.303	0.145	0.0378	0.00506	0.00925	0.0161	0.0167	0.0162	0.0155	0.0136	0.0119	0.00999	0.00779	0.00598	0.0047	0.004
1	-1	1	-1	0.013	0.022	0.032	0.0352	0.0383	0.049	0.0762	0.0936	0.103	0.109	0.112	0.111	0.104	0.0986	0.102	0.114	0.135	0.168	0.221	0.331	0.484	0.642	0.77	0.853	0.888	0.87	0.805	0.706	0.578	0.428	0.27	0.127	0.0262	-0.000382	0.00487	0.014	0.0153	0.0149	0.0153	0.0144	0.0129	0.0111	0.00889	0.00715	0.00607	0.00542
1	-1	1	-1	0.0496	0.037	0.0284	0.0291	0.0272	0.0284	0.0452	0.0573	0.0644	0.0679	0.0687	0.0682	0.066	0.0646	0.0692	0.0764	0.0855	0.106	0.145	0.23	0.347	0.467	0.564	0.627	0.654	0.642	0.595	0.52	0.423	0.307	0.184	0.0772	0.00594	-0.011	-0.005	0.00307	0.0061	0.00704	0.00729	0.00665	0.00611	0.00538	0.00449	0.00378	0.00322	0.00292
1	-1	1	-1	0.127	0.0714	0.0391	0.0418	0.0737	0.13	0.18	0.206	0.228	0.235	0.229	0.214	0.19	0.17	0.177	0.215	0.265	0.323	0.39	0.497	0.631	0.757	0.846	0.888	0.88	0.825	0.734	0.626	0.511	0.387	0.253	0.13	0.044	0.0196	0.0236	0.0288	0.0283	0.0252	0.0208	0.016	0.0125	0.0101	0.00819	0.00699	0.00591	0.00494
1	-1	1	-1	0.0588	0.0779	0.0852	0.0851	0.104	0.144	0.198	0.227	0.244	0.255	0.255	0.241	0.219	0.205	0.213	0.248	0.301	0.364	0.443	0.556	0.687	0.807	0.89	0.924	0.906	0.841	0.742	0.629	0.509	0.384	0.253	0.133	0.0522	0.0266	0.0254	0.0279	0.0271	0.0245	0.0216	0.0185	0.0158	0.0131	0.0101	0.00775	0.00626	0.00539
1	-1	1	-1	0.0793	0.0591	0.0453	0.0539	0.0761	0.104	0.166	0.197	0.217	0.226	0.224	0.209	0.185	0.169	0.178	0.211	0.258	0.317	0.392	0.496	0.619	0.728	0.801	0.831	0.814	0.753	0.66	0.558	0.456	0.348	0.231	0.121	0.0455	0.0243	0.0267	0.0279	0.0248	0.021	0.0173	0.0135	0.0105	0.00809	0.00609	0.00444	0.00337	0.00276
1	-1	1	1	0.0095167	0.0160924	0.0221192	0.0201943	0.0222913	0.0274647	0.0367135	0.0440027	0.0469744	0.0492669	0.0497092	0.0482831	0.0451748	0.0431106	0.0476405	0.0577208	0.0704486	0.0926284	0.127609	0.185807	0.263914	0.343045	0.407319	0.449228	0.465719	0.457322	0.42832	0.382645	0.32464	0.255267	0.181045	0.116551	0.0699956	0.050548	0.0472092	0.044305	0.0373364	0.0289377	0.0212956	0.0150289	0.0111894	0.00873555	0.00711892	0.00622856	0.00560126	0.00564525
1	-1	1	1	0.0016425	0.00303001	0.00414128	0.0046774	0.00926303	0.0146133	0.0193892	0.022656	0.0247464	0.0257629	0.0261189	0.025516	0.0234012	0.0214565	0.0230363	0.0311901	0.0483236	0.0753969	0.111757	0.155226	0.20225	0.248357	0.289436	0.321773	0.341066	0.343	0.325437	0.29207	0.249345	0.20326	0.158342	0.117862	0.0838672	0.057323	0.0383421	0.0263463	0.0202192	0.018043	0.0170547	0.0149805	0.0113668	0.00773138	0.00511612	0.00369877	0.00325909	0.00360158
1	-1	1	1	0.0111784	0.0187029	0.0205632	0.0233104	0.0276073	0.0327213	0.0371472	0.0406097	0.0408598	0.0415686	0.0414596	0.0388612	0.0356964	0.0356228	0.0411252	0.0537764	0.0716661	0.0929465	0.122025	0.175791	0.25122	0.328125	0.390318	0.432046	0.450114	0.443578	0.416337	0.374267	0.321316	0.259149	0.190164	0.124523	0.0776093	0.0600772	0.0575481	0.0543804	0.0465915	0.0373486	0.0286551	0.0211269	0.0159503	0.0129862	0.0110604	0.00975245	0.0087078	0.00830781
1	-1	1	1	0.0387152	0.0508072	0.0681038	0.0739321	0.074704	0.0871126	0.113884	0.127661	0.134036	0.137695	0.137164	0.133363	0.124178	0.113029	0.114809	0.133681	0.16093	0.198267	0.243214	0.292975	0.345519	0.3905	0.418461	0.42676	0.41205	0.378245	0.334219	0.288507	0.250558	0.215341	0.174969	0.138767	0.113198	0.0995513	0.0932948	0.0856557	0.0736354	0.0601676	0.046803	0.0359193	0.0286552	0.0234602	0.0198932	0.0181331	0.0171126	0.0169332
1	-1	1	1	0.0258506	0.0453566	0.0615844	0.062784	0.062608	0.0927482	0.126701	0.146691	0.15443	0.157041	0.152368	0.141478	0.125548	0.112203	0.112369	0.131558	0.166636	0.210193	0.256301	0.310356	0.368593	0.414959	0.439959	0.441739	0.421279	0.383473	0.337227	0.293473	0.25537	0.219856	0.181762	0.144459	0.117787	0.105272	0.0993916	0.0914244	0.0787314	0.0640834	0.0503707	0.0386919	0.0300412	0.0244505	0.0207688	0.0189817	0.0173412	0.0167948
1	-1	1	1	0	0.0204446	0.0451484	0.049968	0.05682	0.0807257	0.110012	0.122627	0.128918	0.129567	0.126213	0.119085	0.109055	0.100274	0.102651	0.123083	0.152633	0.19121	0.232764	0.279349	0.328793	0.369333	0.392585	0.396152	0.380371	0.349577	0.312189	0.27443	0.241122	0.210621	0.17344	0.138183	0.113876	0.101226	0.0929166	0.082637	0.0693003	0.0550523	0.0421369	0.0317985	0.0253072	0.022337	0.020627	0.0194831	0.0189074	0.0192595
1	-1	1	1	0.0106047	0.0153184	0.0226022	0.0228607	0.0263727	0.0400059	0.061157	0.0725341	0.078552	0.0808167	0.0794602	0.075484	0.0675476	0.0582621	0.0600934	0.0770388	0.10037	0.129554	0.170459	0.232118	0.307854	0.377653	0.427331	0.452534	0.452465	0.428069	0.383471	0.326736	0.267903	0.205053	0.136251	0.0747441	0.0353356	0.0236544	0.0247042	0.0239483	0.0197571	0.0155015	0.0120744	0.00856135	0.00605291	0.00457785	0.0034817	0.00291036	0.00252937	0.0023107
1	-1	1	1	0.0136339	0.0171774	0.0220593	0.0273903	0.034903	0.05147	0.0735642	0.0850328	0.0904962	0.0936104	0.0929426	0.0882848	0.0795098	0.0700198	0.0693833	0.0840382	0.109743	0.142371	0.185759	0.250364	0.327876	0.400567	0.455161	0.486647	0.490973	0.467922	0.423038	0.364234	0.300131	0.232607	0.162262	0.0978395	0.0526526	0.0363854	0.0335933	0.0315164	0.0269574	0.0218352	0.0173564	0.0134633	0.0107822	0.0086782	0.00672746	0.00524841	0.00440523	0.00409526
1	-1	1	1	0.0218151	0.0272641	0.0352374	0.0417541	0.0490399	0.0633034	0.0860167	0.0986749	0.104842	0.106637	0.104861	0.099263	0.0888196	0.0805654	0.0850943	0.105618	0.135312	0.173895	0.220414	0.283749	0.363519	0.438684	0.492726	0.520279	0.519121	0.489597	0.438214	0.377313	0.314115	0.246614	0.173894	0.107234	0.0584995	0.0389415	0.0377382	0.036507	0.0315996	0.0256436	0.0198965	0.0145476	0.0110384	0.00918095	0.0073863	0.00597879	0.00525583	0.00483935
1	-1	1	1	0.0598445	0.0795342	0.0946228	0.0831503	0.0713862	0.0739242	0.0986677	0.115446	0.122884	0.127294	0.129025	0.128706	0.122445	0.113319	0.111575	0.119959	0.138222	0.170241	0.219724	0.285265	0.361413	0.434525	0.488149	0.513535	0.512222	0.488168	0.443439	0.386723	0.326587	0.261968	0.196229	0.138478	0.0995515	0.0814092	0.0756369	0.0705952	0.060298	0.0473388	0.036005	0.0272811	0.0210355	0.0169455	0.0141151	0.0120574	0.0107934	0.0103837
1	-1	1	1	0.0271562	0.0284081	0.0353167	0.0374972	0.0411593	0.050258	0.064398	0.0772918	0.0845814	0.087615	0.0885741	0.0878123	0.0833022	0.0807271	0.0855457	0.0993418	0.119729	0.145301	0.179348	0.231853	0.300259	0.36693	0.417231	0.445358	0.450301	0.433939	0.401556	0.360304	0.31246	0.258008	0.198857	0.143066	0.101495	0.0829732	0.0779005	0.0714958	0.0604822	0.047285	0.0349902	0.0257621	0.0203761	0.0175144	0.0151032	0.0132156	0.0119367	0.0117874
1	-1	1	1	0.0271562	0.0284081	0.0353167	0.0374972	0.0411593	0.050258	0.064398	0.0772918	0.0845814	0.087615	0.0885741	0.0878123	0.0833022	0.0807271	0.0855457	0.0993418	0.119729	0.145301	0.179348	0.231853	0.300259	0.36693	0.417231	0.445358	0.450301	0.433939	0.401556	0.360304	0.31246	0.258008	0.198857	0.143066	0.101495	0.0829732	0.0779005	0.0714958	0.0604822	0.047285	0.0349902	0.0257621	0.0203761	0.0175144	0.0151032	0.0132156	0.0119367	0.0117874
1	-1	-1	1	0	0.0195	0.0371	0.035	0.0395	0.0443	0.0684	0.0811	0.0858	0.0867	0.0839	0.0764	0.063	0.0526	0.0573	0.0767	0.101	0.128	0.156	0.177	0.187	0.189	0.18	0.161	0.135	0.108	0.0888	0.0881	0.108	0.135	0.157	0.17	0.176	0.174	0.164	0.147	0.123	0.097	0.0708	0.05	0.0359	0.0292	0.0265	0.0251	0.0241	0.025
1	-1	-1	1	0.0289	0.0256	0.021	0.0163	0.0216	0.0418	0.0649	0.0795	0.0863	0.0891	0.0866	0.0781	0.0641	0.0511	0.0524	0.0691	0.0931	0.118	0.141	0.159	0.168	0.168	0.16	0.146	0.124	0.101	0.0832	0.0829	0.102	0.127	0.147	0.159	0.164	0.162	0.152	0.137	0.117	0.0937	0.0685	0.0477	0.0342	0.0282	0.0254	0.0242	0.0234	0.024
1	-1	-1	1	0.0431	0.0234	0.0104	0.0147	0.0261	0.0459	0.062	0.0684	0.0737	0.0732	0.0681	0.0588	0.0456	0.0354	0.0381	0.0557	0.0808	0.106	0.127	0.142	0.15	0.151	0.145	0.132	0.113	0.0922	0.0755	0.0735	0.0886	0.11	0.127	0.138	0.142	0.141	0.132	0.119	0.101	0.0805	0.0589	0.0408	0.0282	0.0221	0.0193	0.0181	0.0177	0.0187
1	-1	-1	1	0.125	0.0871	0.0646	0.0715	0.0874	0.116	0.169	0.189	0.201	0.199	0.187	0.167	0.14	0.121	0.13	0.169	0.222	0.28	0.334	0.368	0.38	0.371	0.34	0.292	0.23	0.162	0.104	0.0717	0.072	0.0894	0.102	0.108	0.111	0.108	0.101	0.0906	0.0768	0.0612	0.0448	0.0318	0.0236	0.0187	0.016	0.0154	0.0153	0.0158
1	-1	-1	1	0.0856	0.071	0.0535	0.048	0.0627	0.0908	0.144	0.171	0.188	0.196	0.19	0.174	0.148	0.124	0.129	0.162	0.205	0.253	0.299	0.327	0.337	0.329	0.303	0.261	0.206	0.146	0.0928	0.0634	0.0685	0.0872	0.0993	0.105	0.105	0.101	0.094	0.0835	0.0705	0.0566	0.0428	0.0317	0.0239	0.0204	0.0188	0.0176	0.0171	0.0174
1	-1	-1	1	0.048	0.0439	0.0422	0.0429	0.0532	0.0897	0.148	0.176	0.193	0.198	0.192	0.175	0.147	0.122	0.125	0.161	0.212	0.269	0.321	0.356	0.369	0.361	0.333	0.286	0.223	0.154	0.0905	0.0538	0.054	0.0701	0.082	0.0883	0.0901	0.0882	0.0829	0.0746	0.0636	0.0504	0.0362	0.0253	0.0186	0.0157	0.0147	0.0143	0.0141	0.0147
-1	1	1	-1	0.153	0.105	0.065	0.0503	0.0711	0.088	0.0974	0.0954	0.0973	0.0947	0.0884	0.0799	0.0719	0.0703	0.0736	0.0763	0.0716	0.0657	0.0907	0.227	0.452	0.691	0.896	1.05	1.14	1.33	1.14	1.05	0.905	0.706	0.478	0.263	0.122	0.0982	0.114	0.117	0.108	0.0949	0.0824	0.0731	0.0688	0.0687	0.0709	0.0737	0.0752	0.0747
-1	1	1	-1	0.135	0.118	0.0852	0.0447	0.0631	0.0929	0.0967	0.0902	0.0893	0.0936	0.0922	0.083	0.069	0.0559	0.0519	0.0608	0.0732	0.0872	0.107	0.209	0.415	0.654	0.872	1.04	1.15	1.19	1.16	1.07	0.927	0.743	0.53	0.315	0.146	0.0863	0.0975	0.107	0.105	0.0967	0.0851	0.0743	0.0677	0.0669	0.0711	0.076	0.0784	0.0781
-1	1	1	-1	0.0921	0.0645	0.0489	0.0577	0.078	0.106	0.116	0.116	0.118	0.113	0.102	0.0925	0.0826	0.077	0.0759	0.0774	0.0724	0.0667	0.104	0.262	0.507	0.77	0.995	1.16	1.26	1.46	1.26	1.16	0.99	0.768	0.515	0.284	0.139	0.112	0.124	0.13	0.12	0.108	0.0984	0.0887	0.0827	0.0821	0.0849	0.0886	0.0916	0.0926
-1	1	1	-1	0.175	0.135	0.117	0.125	0.145	0.154	0.151	0.143	0.138	0.124	0.108	0.0951	0.0833	0.0774	0.0766	0.0784	0.0808	0.089	0.118	0.197	0.323	0.459	0.578	0.671	0.735	0.768	0.768	0.737	0.675	0.588	0.485	0.384	0.312	0.284	0.277	0.263	0.239	0.214	0.191	0.175	0.164	0.16	0.162	0.167	0.17	0.17
-1	1	1	-1	0.152	0.12	0.0963	0.115	0.164	0.206	0.218	0.208	0.203	0.19	0.166	0.139	0.112	0.0922	0.0813	0.0772	0.0749	0.0843	0.118	0.211	0.356	0.514	0.654	0.764	0.837	0.871	0.868	0.829	0.752	0.641	0.511	0.389	0.304	0.274	0.266	0.253	0.232	0.208	0.187	0.173	0.168	0.172	0.18	0.189	0.194	0.195
-1	1	1	-1	0.126	0.109	0.1	0.114	0.151	0.174	0.179	0.173	0.171	0.159	0.141	0.119	0.0958	0.0825	0.077	0.0744	0.0715	0.0723	0.0915	0.176	0.313	0.459	0.588	0.687	0.752	0.784	0.782	0.748	0.683	0.584	0.462	0.344	0.262	0.239	0.236	0.223	0.203	0.182	0.163	0.151	0.147	0.15	0.156	0.162	0.165	0.166
-1	1	1	1	0.0169142	0.0193714	0.0216994	0.0258401	0.0321837	0.0336669	0.0366178	0.0365833	0.0369181	0.0365175	0.0348829	0.0327268	0.0310913	0.0310095	0.0328324	0.0349212	0.0367275	0.0411516	0.0568353	0.0956875	0.156577	0.22418	0.284355	0.330219	0.358937	0.372087	0.370632	0.354633	0.324062	0.28072	0.22804	0.175143	0.136505	0.119107	0.112405	0.103131	0.0889536	0.0734394	0.0592825	0.0493144	0.0439222	0.0420446	0.0422681	0.0435964	0.0438561	0.0430891
-1	1	1	1	0.0201939	0.0145314	0.0112952	0.0202896	0.0288731	0.0326929	0.0379924	0.0399255	0.0412447	0.0400276	0.0371465	0.0338099	0.0314798	0.0298148	0.028499	0.0290896	0.0314884	0.0368729	0.0527138	0.0893449	0.145356	0.206412	0.260557	0.302407	0.328927	0.341319	0.339251	0.322349	0.292189	0.252464	0.205275	0.157725	0.122253	0.10578	0.0991217	0.0903157	0.0776448	0.0636206	0.0505669	0.0412373	0.0353909	0.0326522	0.0323214	0.0335873	0.0342514	0.0347794
-1	1	1	1	0.0427451	0.0247271	0.0170483	0.0296956	0.0383248	0.0427326	0.0451268	0.0445949	0.0459922	0.0432054	0.038454	0.0348914	0.0330595	0.0315548	0.0310733	0.0325207	0.0351661	0.0404721	0.0592042	0.104417	0.172788	0.246276	0.310828	0.359418	0.389234	0.401329	0.396251	0.374183	0.336906	0.286938	0.228243	0.171325	0.132265	0.116418	0.110631	0.101975	0.0890325	0.0738306	0.0591259	0.0485898	0.0431742	0.0414254	0.0414732	0.0418673	0.0418981	0.0415963
-1	1	1	1	0.0173443	0.0347987	0.0544853	0.0678805	0.0903567	0.0987735	0.103793	0.10001	0.0940565	0.0840189	0.0719943	0.0586632	0.0452731	0.0349963	0.0307995	0.028217	0.0273787	0.0291142	0.0397692	0.0665603	0.109992	0.158365	0.202606	0.240602	0.268624	0.289257	0.303522	0.310018	0.306667	0.292793	0.268945	0.238871	0.213341	0.198351	0.18741	0.170856	0.149017	0.127025	0.107264	0.0942512	0.0888311	0.088576	0.0906202	0.093588	0.0952384	0.0953428
-1	1	1	1	0.0588363	0.0531728	0.063474	0.0888746	0.115667	0.124638	0.12746	0.12051	0.115287	0.102099	0.0855645	0.0703646	0.0567305	0.0477765	0.0437318	0.0413869	0.0392737	0.0411902	0.0577476	0.0979391	0.158088	0.222776	0.280145	0.325153	0.356424	0.3777	0.390643	0.393513	0.383694	0.361358	0.326598	0.288623	0.263634	0.251914	0.240966	0.221925	0.195838	0.168115	0.143446	0.126598	0.11937	0.119534	0.122619	0.126963	0.129072	0.12892
-1	1	1	1	0.0316487	0.0331911	0.039659	0.0712241	0.0968216	0.113474	0.119378	0.116528	0.112534	0.101327	0.0860788	0.0681718	0.0540713	0.0449272	0.0384113	0.0366745	0.0362744	0.0403059	0.0540197	0.0890564	0.142895	0.201125	0.25196	0.291992	0.319719	0.33823	0.349751	0.355671	0.352216	0.336393	0.309754	0.280065	0.256802	0.245257	0.234598	0.216972	0.191411	0.162605	0.135682	0.117443	0.108195	0.107835	0.110983	0.113832	0.115099	0.115414
-1	1	1	1	0.0913944	0.0856603	0.11014	0.130935	0.155862	0.178442	0.192332	0.182495	0.175979	0.156826	0.134905	0.118656	0.103161	0.0912274	0.0855356	0.0862773	0.0895369	0.111749	0.158366	0.229069	0.333406	0.446529	0.546067	0.621905	0.669714	0.694087	0.692179	0.661629	0.602194	0.520467	0.427526	0.345255	0.282493	0.245295	0.231079	0.213464	0.190733	0.169272	0.150671	0.138649	0.13353	0.133475	0.13496	0.137595	0.138989	0.138525
-1	1	1	1	0.0836703	0.0760886	0.0769828	0.101058	0.124672	0.1315	0.134868	0.131681	0.129425	0.122241	0.109828	0.0974367	0.0880621	0.0815012	0.0796595	0.0801954	0.0812174	0.0886225	0.114501	0.174842	0.275886	0.387567	0.487571	0.56472	0.613875	0.637148	0.634616	0.605274	0.549945	0.473707	0.38352	0.295312	0.229247	0.198367	0.191325	0.179554	0.16087	0.140264	0.122129	0.110571	0.104757	0.102325	0.102523	0.104592	0.10513	0.104527
-1	1	1	1	0.0843658	0.0680572	0.0618245	0.0767705	0.0992636	0.102134	0.103368	0.100417	0.10007	0.0940535	0.0844228	0.0759185	0.0699056	0.0686163	0.0716475	0.0745672	0.0750863	0.0826849	0.110203	0.178053	0.278429	0.38488	0.478771	0.550268	0.594364	0.612993	0.605733	0.571815	0.513053	0.43374	0.342762	0.25857	0.198529	0.175243	0.167403	0.155532	0.139761	0.123281	0.107237	0.0954996	0.0891764	0.0867899	0.0868223	0.0883112	0.0889524	0.0879865
-1	1	1	1	0.0772993	0.0774155	0.080375	0.0868371	0.0965994	0.105695	0.115225	0.116895	0.116013	0.109225	0.101575	0.0940489	0.0857731	0.079443	0.075223	0.0720631	0.0712866	0.0793555	0.106407	0.165187	0.257598	0.35873	0.4471	0.515484	0.560751	0.581485	0.578491	0.554253	0.50761	0.44072	0.363394	0.28931	0.234543	0.209856	0.202327	0.190573	0.170865	0.14858	0.127128	0.110394	0.101554	0.0989354	0.0991561	0.101179	0.101858	0.101751
-1	1	1	1	0.0904091	0.0723818	0.0696697	0.0859147	0.114907	0.123214	0.132037	0.128619	0.127688	0.121323	0.109884	0.0976072	0.0853887	0.0777611	0.076452	0.0774174	0.0778046	0.0831223	0.110547	0.175433	0.269878	0.371241	0.46154	0.533092	0.580908	0.606131	0.608764	0.587659	0.542512	0.478938	0.401947	0.324631	0.266697	0.241091	0.227086	0.206556	0.180502	0.154989	0.133473	0.118191	0.108709	0.105566	0.10706	0.111468	0.11378	0.11378
-1	1	1	1	0.0896621	0.0701252	0.0602167	0.0747863	0.100892	0.111607	0.120295	0.117358	0.119086	0.113561	0.103761	0.0928519	0.0826274	0.0755644	0.0726936	0.0693039	0.0654475	0.0651659	0.0840278	0.141937	0.229099	0.323275	0.40877	0.473125	0.514548	0.537091	0.537326	0.518299	0.479188	0.419962	0.346868	0.272935	0.224274	0.206354	0.197491	0.183086	0.16146	0.13799	0.116638	0.102633	0.0949045	0.0941894	0.0970536	0.0981749	0.0980204	0.0972154
-1	1	-1	1	0.0951	0.0685	0.0477	0.0483	0.0758	0.0833	0.0892	0.0863	0.0857	0.0798	0.0688	0.0558	0.0415	0.0308	0.0264	0.0235	0.0213	0.023	0.0314	0.0408	0.05	0.0606	0.0732	0.0861	0.1	0.12	0.145	0.177	0.213	0.249	0.279	0.298	0.305	0.301	0.285	0.26	0.228	0.193	0.159	0.134	0.119	0.114	0.117	0.122	0.125	0.127
-1	1	-1	1	0.057	0.0608	0.0645	0.0667	0.079	0.0784	0.0771	0.0722	0.0665	0.0583	0.0488	0.0391	0.0288	0.0215	0.0174	0.0144	0.0132	0.0167	0.0253	0.0357	0.0466	0.0579	0.0686	0.0776	0.0878	0.105	0.13	0.164	0.202	0.239	0.27	0.29	0.299	0.295	0.278	0.251	0.217	0.178	0.143	0.118	0.105	0.101	0.102	0.105	0.106	0.106
-1	1	-1	1	0.0568	0.0601	0.0706	0.0723	0.0933	0.0942	0.101	0.0981	0.093	0.083	0.072	0.0604	0.0464	0.0347	0.0297	0.0266	0.0226	0.0239	0.0337	0.0428	0.0504	0.0591	0.0707	0.0841	0.101	0.124	0.151	0.187	0.229	0.271	0.304	0.325	0.333	0.327	0.308	0.28	0.245	0.207	0.171	0.143	0.126	0.121	0.124	0.128	0.129	0.13
-1	1	-1	1	0.0918	0.0812	0.0855	0.107	0.132	0.132	0.13	0.127	0.122	0.107	0.0891	0.0742	0.0607	0.0494	0.0428	0.0387	0.0344	0.034	0.041	0.0516	0.0648	0.0782	0.0904	0.103	0.12	0.142	0.166	0.192	0.22	0.245	0.265	0.279	0.284	0.28	0.267	0.247	0.222	0.195	0.172	0.155	0.142	0.139	0.139	0.141	0.144	0.146
-1	1	-1	1	0.0277	0.0512	0.0738	0.089	0.107	0.109	0.114	0.111	0.104	0.0912	0.0783	0.0648	0.0513	0.0431	0.0369	0.0301	0.0266	0.0297	0.0386	0.0494	0.0619	0.0745	0.0867	0.0978	0.111	0.13	0.152	0.178	0.204	0.228	0.247	0.259	0.263	0.26	0.25	0.232	0.207	0.18	0.156	0.139	0.129	0.126	0.127	0.129	0.13	0.131
-1	1	-1	1	0.111	0.0775	0.0546	0.0606	0.088	0.0999	0.119	0.12	0.122	0.115	0.101	0.0832	0.0642	0.0491	0.0387	0.0301	0.0261	0.0313	0.0437	0.0552	0.0668	0.0785	0.0907	0.103	0.118	0.138	0.161	0.19	0.222	0.252	0.276	0.292	0.297	0.293	0.279	0.255	0.227	0.198	0.171	0.15	0.136	0.133	0.135	0.137	0.14	0.143
-1	-1	1	1	0.0407	0.0327	0.0252	0.0219	0.0216	0.0186	0.0229	0.027	0.0296	0.0316	0.0332	0.0338	0.0342	0.0362	0.0373	0.036	0.0323	0.0263	0.0372	0.104	0.213	0.33	0.433	0.51	0.559	0.579	0.575	0.546	0.492	0.413	0.318	0.222	0.158	0.145	0.145	0.135	0.116	0.0909	0.0659	0.0461	0.0337	0.0276	0.0243	0.0232	0.0229	0.0236
-1	-1	1	1	0.0614	0.0379	0.0231	0.0157	0.014	0.00987	0.0174	0.0234	0.0294	0.0332	0.0356	0.0396	0.0419	0.043	0.0434	0.0409	0.0332	0.0293	0.0491	0.114	0.219	0.334	0.434	0.51	0.559	0.582	0.578	0.551	0.498	0.421	0.329	0.243	0.184	0.166	0.163	0.152	0.129	0.101	0.0748	0.0538	0.0394	0.0324	0.0286	0.0264	0.0257	0.0262
-1	-1	1	1	0.0455	0.0264	0.0118	0.0116	0.0119	0.0106	0.0135	0.0176	0.0224	0.0251	0.026	0.0273	0.0294	0.032	0.0327	0.03	0.0249	0.0191	0.029	0.0905	0.187	0.293	0.387	0.458	0.504	0.528	0.527	0.503	0.453	0.381	0.294	0.207	0.15	0.137	0.133	0.122	0.103	0.0793	0.0574	0.0407	0.0294	0.023	0.0196	0.0179	0.0172	0.0179
-1	-1	1	1	0.0645	0.0434	0.0291	0.0223	0.0253	0.0259	0.0327	0.0399	0.0467	0.0501	0.0533	0.0576	0.0613	0.0657	0.0699	0.0697	0.0605	0.0532	0.0892	0.218	0.413	0.625	0.807	0.943	1.03	1.05	1.02	0.94	0.802	0.621	0.416	0.231	0.116	0.0878	0.0906	0.0908	0.0785	0.0625	0.047	0.033	0.0227	0.0169	0.0136	0.0118	0.011	0.0115
-1	-1	1	1	0.0604	0.0416	0.0267	0.0206	0.0176	0.0141	0.0216	0.0266	0.0316	0.035	0.0382	0.042	0.0446	0.0483	0.0515	0.0511	0.0425	0.0348	0.0603	0.173	0.352	0.544	0.707	0.828	0.902	0.925	0.896	0.821	0.699	0.536	0.351	0.181	0.0736	0.0547	0.0651	0.0663	0.0567	0.0449	0.0344	0.0244	0.0175	0.0144	0.0123	0.0106	0.00924	0.00902
-1	-1	1	1	0.053	0.0384	0.0251	0.019	0.0175	0.0142	0.0199	0.0264	0.0315	0.0356	0.0388	0.0411	0.0431	0.0456	0.0475	0.0476	0.0417	0.0324	0.0524	0.151	0.315	0.499	0.659	0.779	0.854	0.881	0.858	0.789	0.677	0.527	0.353	0.188	0.079	0.0513	0.0581	0.0625	0.0545	0.0435	0.0333	0.0232	0.0157	0.0119	0.00995	0.00844	0.00751	0.00756
real dataset
HMX	RDX	TATB	TNT	spectrum
1	1	-1	-1	0.125	0.117	0.117	0.18	0.251	0.302	0.322	0.319	0.312	0.287	0.248	0.199	0.15	0.117	0.113	0.133	0.169	0.208	0.244	0.274	0.292	0.296	0.29	0.275	0.254	0.23	0.211	0.211	0.23	0.257	0.278	0.288	0.287	0.278	0.26	0.237	0.213	0.188	0.167	0.153	0.15	0.153	0.161	0.17	0.178	0.181
-1	1	-1	-1	0.118	0.17	0.237	0.306	0.395	0.435	0.43	0.394	0.358	0.307	0.245	0.185	0.13	0.0845	0.0638	0.0607	0.0635	0.0762	0.0964	0.118	0.14	0.165	0.19	0.218	0.253	0.298	0.348	0.401	0.453	0.505	0.547	0.573	0.578	0.564	0.532	0.491	0.442	0.393	0.358	0.341	0.336	0.343	0.36	0.383	0.4	0.409
1	-1	-1	-1	0.0629	0.0914	0.12	0.122	0.125	0.148	0.229	0.275	0.297	0.308	0.308	0.288	0.248	0.222	0.238	0.29	0.36	0.435	0.511	0.559	0.572	0.553	0.505	0.429	0.328	0.21	0.103	0.0403	0.023	0.0261	0.0305	0.0297	0.026	0.0215	0.0176	0.0151	0.0117	0.00852	0.0072	0.00618	0.0048	0.0036	0.00294	0.00311	0.00353	0.0044
1	1	-1	1	0.0489	0.0746	0.0967	0.124	0.152	0.163	0.177	0.179	0.172	0.159	0.141	0.12	0.0985	0.0852	0.0869	0.0996	0.119	0.142	0.168	0.189	0.201	0.202	0.195	0.183	0.168	0.152	0.138	0.136	0.146	0.159	0.17	0.175	0.175	0.171	0.16	0.145	0.129	0.113	0.1	0.0917	0.0874	0.0867	0.0877	0.0897	0.0913	0.0923
1	-1	-1	1	0.028	0.0283	0.0308	0.0426	0.0564	0.0833	0.116	0.131	0.139	0.141	0.136	0.124	0.107	0.096	0.101	0.122	0.154	0.188	0.216	0.234	0.238	0.23	0.21	0.181	0.144	0.104	0.069	0.0506	0.0495	0.0568	0.0632	0.0652	0.0641	0.0602	0.0535	0.0455	0.0362	0.0264	0.0183	0.012	0.00694	0.00397	0.00243	0.00169	0.00167	0.00254
[truncated: 1,823 more columns]
